# Supplementary material
Source: publisher site journal article supplement (https://www.dovepress.com/get_supplementary_file.php?f=177206-1.xlsx)
Supplement: Supplementary file 1 [file get_supplementary_file.php]

## Sheet: Temperature
		R150Q			Trajectory #2					R150Q			Trajectory #1					R150Q			Trajectory #3					R150-WT			Trajectory #1					R150-WT			Trajectory #2					R150-WT			Trajectory #3
		t	T (K)			AVG	STDEV			t	T (K)			AVG	STDEV			t	T (K)			AVG	STDEV			t	T (K)			AVG	STDEV			t	T (K)			AVG	STDEV			t	T (K)			AVG	STDEV
		0	298		0-100	293.032	14.8368			0	298		0-100	292.966	15.1073			0	298		0-100	293.13	15.3548			0	298		0-100	293.076	15.0688			0	298		0-100	292.906	14.8796			0	298		0-100	293.165	15.1234
		0.5	361.789		0.5-100.5	292.905	14.9033			0.5	358.956		0.5-100.5	292.835	15.1771			0.5	361.322		0.5-100.5	293.105	15.3895			0.5	363.841		0.5-100.5	292.943	15.1433			0.5	365.269		0.5-100.5	292.881	14.9125			0.5	359.557		0.5-100.5	293.141	15.1575
		1	232.306		1-101	292.626	14.1109			1	231.215		1-101	292.561	14.4575			1	226.821		1-101	292.651	14.6901			1	231.762		1-101	292.608	14.2877			1	233.689		1-101	292.434	14.047			1	230.538		1-101	292.808	14.4402
		1.5	207.594		…	292.948	13.4506			1.5	210.733		…	292.911	13.8015			1.5	208.786		…	293.01	13.9308			1.5	207.657		…	292.971	13.6466			1.5	213.077		…	292.751	13.4161			1.5	212.554		…	293.013	13.8273
		2	365.342			293.309	12.0489			2	374.4			293.254	12.5487			2	371.059			293.465	12.5875			2	371.041			293.291	12.3271			2	373.673			293.207	12.1883			2	372.236			293.439	12.586
		2.5	218.798			293.026	10.9689			2.5	210.908			292.948	11.2425			2.5	211.086			292.973	11.4072			2.5	213.123			293.008	11.1292			2.5	220.476			292.715	10.8346			2.5	214.731			293.1	11.2951
		3	329.691			293.353	9.64453			3	331.177			293.332	9.62832			3	334.732			293.462	9.87097			3	335.051			293.371	9.59504			3	330.558			293.17	9.62819			3	331.491			293.394	9.92304
		3.5	297.562			293.175	9.29432			3.5	299.773			293.108	9.26077			3.5	287.458			293.2	9.45636			3.5	291.376			293.156	9.12935			3.5	295.729			292.942	9.27116			3.5	290.882			293.284	9.61467
		4	243.491			293.199	9.31169			4	235.744			293.134	9.28744			4	244.685			293.235	9.44796			4	244.344			293.244	9.19783			4	244.368			292.899	9.27827			4	245.129			293.251	9.63401
		4.5	346.736			293.389	8.66006			4.5	347.143			293.374	8.37578			4.5	346.549			293.553	8.85714			4.5	348.409			293.405	8.60088			4.5	343.719			293.204	8.65597			4.5	346.971			293.451	9.02347
		5	249.996			293.195	7.85937			5	250.988			293.155	7.49151			5	251.255			293.203	8.1029			5	248.638			293.18	7.69929			5	248.068			292.889	7.92239			5	252.634			293.246	8.22993
		5.5	289.934			293.423	7.2402			5.5	295.204			293.362	6.86956			5.5	293.799			293.457	7.55956			5.5	291.981			293.403	7.02205			5.5	303.141			293.156	7.27784			5.5	293.849			293.366	7.79791
		6	315.911			293.422	7.24035			6	314.438			293.33	6.87604			6	313.117			293.446	7.56058			6	308.006			293.369	7.04577			6	307.412			293.1	7.2438			6	316.696			293.422	7.84097
		6.5	249.133			293.326	7.06626			6.5	257.112			293.273	6.74659			6.5	253.538			293.321	7.44001			6.5	253.482			293.348	7.00937			6.5	256.408			293.004	7.17974			6.5	252.212			293.293	7.66511
		7	326.617			293.555	6.33502			7	324.727			293.41	6.27079			7	324.545			293.583	6.93932			7	328.105			293.495	6.45876			7	326.886			293.239	6.73052			7	334.735			293.479	7.09091
		7.5	279.342			293.378	5.88789			7.5	279.299			293.255	5.86473			7.5	278.863			293.401	6.59238			7.5	275.955			293.34	5.98024			7.5	270.743			293.024	6.32382			7.5	273.649			293.327	6.50201
		8	282.203			293.473	5.81398			8	279.196			293.334	5.78221			8	285.441			293.477	6.5111			8	283.57			293.459	5.87028			8	284.147			293.183	6.1571			8	280.904			293.372	6.3966
		8.5	316.293			293.506	5.76889			8.5	311.039			293.405	5.6947			8.5	315.324			293.553	6.50514			8.5	312.26			293.45	5.88832			8.5	307.104			293.23	6.12359			8.5	320.188			293.439	6.335
		9	270.596			293.416	5.54879			9	265.632			293.354	5.58163			9	262.854			293.402	6.34634			9	270.465			293.389	5.75464			9	266.53			293.14	6.05058			9	264.952			293.303	6.04158
		9.5	305.342			293.531	5.30779			9.5	304.955			293.471	5.23328			9.5	305.957			293.594	5.9882			9.5	304.659			293.495	5.52183			9.5	308.607			293.308	5.76753			9.5	305.459			293.421	5.70525
		10	296.748			293.474	5.24137			10	297.415			293.408	5.17015			10	292.843			293.516	5.92715			10	294.778			293.431	5.46586			10	279.274			293.226	5.66456			10	290.837			293.373	5.64334
		10.5	274.72			293.464	5.23713			10.5	279.477			293.4	5.16495			10.5	275.439			293.498	5.93485			10.5	276.981			293.435	5.46691			10.5	285.808			293.299	5.57731			10.5	273.77			293.375	5.6424
		11	309.939			293.556	5.06586			11	318.158			293.43	5.10128			11	317.918			293.611	5.80274			11	309.683			293.502	5.34523			11	313.687			293.365	5.56625			11	316.442			293.475	5.46677
		11.5	283.909			293.472	4.93099			11.5	276.473			293.333	4.80549			11.5	274.547			293.453	5.56336			11.5	279.384			293.427	5.22139			11.5	274.899			293.256	5.37648			11.5	272.036			293.384	5.22825
		12	292.06			293.497	4.89477			12	298.112			293.399	4.66176			12	299.757			293.557	5.40026			12	292.096			293.501	5.12586			12	296.869			293.36	5.21842			12	300.34			293.487	5.00254
		12.5	306.104			293.526	4.90291			12.5	294.916			293.363	4.65288			12.5	296.826			293.53	5.38264			12.5	305.183			293.491	5.13025			12.5	296.983			293.357	5.21632			12.5	298.059			293.471	4.98535
		13	275.325			293.474	4.82359			13	282.572			293.372	4.65752			13	277.357			293.491	5.38681			13	282.797			293.446	5.06599			13	281.471			293.354	5.21478			13	283.754			293.443	4.97508
		13.5	311.827			293.56	4.6492			13.5	304.975			293.417	4.59584			13.5	306.764			293.587	5.26773			13.5	305.593			293.505	5.01028			13.5	310.346			293.414	5.14595			13.5	305.499			293.492	4.92696
		14	285.682			293.497	4.48318			14	282.946			293.376	4.52814			14	288.978			293.489	5.2035			14	293.776			293.436	4.93791			14	285.493			293.314	5.0074			14	282.754			293.448	4.85804
		14.5	286.64			293.496	4.48472			14.5	292.958			293.429	4.46742			14.5	285.517			293.514	5.19373			14.5	288.05			293.465	4.9566			14.5	292.217			293.362	4.97796			14.5	291.564			293.503	4.79796
		15	302.523			293.522	4.46004			15	301.114			293.42	4.47016			15	302.213			293.561	5.16332			15	301.699			293.497	4.94227			15	307.047			293.375	4.97829			15	303.765			293.498	4.80101
		15.5	278.501			293.494	4.42095			15.5	282.489			293.388	4.4375			15.5	281.766			293.478	5.15674			15.5	285.78			293.437	4.91569			15.5	279.052			293.314	4.88387			15.5	284.271			293.47	4.75763
		16	303.231			293.545	4.30458			16	299.986			293.437	4.37036			16	297.719			293.536	5.08916			16	297.254			293.502	4.89997			16	301.305			293.392	4.77833			16	299.823			293.502	4.71699
		16.5	291.889			293.526	4.26972			16.5	291.983			293.419	4.35056			16.5	290.447			293.491	5.09184			16.5	294.062			293.44	4.92971			16.5	294.94			293.349	4.74543			16.5	293.624			293.498	4.71259
		17	289.361			293.511	4.28108			17	288.162			293.425	4.34939			17	290.465			293.496	5.08933			17	288.903			293.43	4.93058			17	280.79			293.343	4.74417			17	284.639			293.522	4.72475
		17.5	296.877			293.516	4.27667			17.5	297.577			293.447	4.33389			17.5	295.181			293.522	5.08735			17.5	297.207			293.474	4.92921			17.5	300.853			293.406	4.65954			17.5	304.163			293.584	4.68827
		18	290.829			293.505	4.27075			18	290.911			293.453	4.34116			18	294.288			293.5	5.08983			18	288.158			293.443	4.92537			18	286.213			293.38	4.6322			18	287.84			293.517	4.63119
		18.5	296.011			293.497	4.27717			18.5	295.233			293.417	4.39202			18.5	290.12			293.476	5.09767			18.5	299.791			293.474	4.91153			18.5	291.695			293.417	4.6042			18.5	298.313			293.554	4.61521
		19	294.024			293.485	4.27346			19	292.67			293.405	4.39043			19	301.637			293.513	5.10048			19	295.148			293.436	4.89173			19	302.851			293.405	4.61207			19	293.564			293.551	4.61172
		19.5	291.305			293.466	4.27954			19.5	288.459			293.437	4.40932			19.5	285.986			293.455	5.07379			19.5	287.48			293.416	4.89311			19.5	289.256			293.358	4.56296			19.5	290.166			293.544	4.61259
		20	301.498			293.462	4.28218			20	293.014			293.436	4.41058			20	299.011			293.477	5.05035			20	292.57			293.455	4.87667			20	303.026			293.364	4.55858			20	299.949			293.539	4.61753
		20.5	289.383			293.453	4.26753			20.5	288.067			293.464	4.42506			20.5	288.472			293.453	5.03529			20.5	289.213			293.453	4.87706			20.5	287.171			293.319	4.50689			20.5	293.055			293.52	4.59919
		21	290.843			293.451	4.2699			21	293.56			293.47	4.41819			21	292.527			293.466	5.02605			21	295.269			293.463	4.87023			21	293.351			293.339	4.48833			21	300.815			293.518	4.59961
		21.5	289.536			293.473	4.2682			21.5	293.479			293.458	4.42118			21.5	300.659			293.481	5.02787			21.5	298.026			293.467	4.87177			21.5	298.625			293.35	4.49115			21.5	294.035			293.46	4.57919
		22	292.475			293.5	4.26009			22	292.53			293.474	4.42677			22	292.311			293.458	5.0054			22	290.498			293.444	4.86103			22	284.029			293.336	4.47907			22	285.646			293.471	4.58277
		22.5	296.745			293.47	4.28884			22.5	296.532			293.445	4.4517			22.5	295.58			293.449	5.00943			22.5	293.451			293.432	4.87088			22.5	292.861			293.379	4.43036			22.5	294.764			293.512	4.54883
		23	290.247			293.47	4.28919			23	290.589			293.437	4.44765			23	293.34			293.471	5.02885			23	294.285			293.464	4.89117			23	298.268			293.381	4.43021			23	292.863			293.524	4.55483
		23.5	289.812			293.47	4.28939			23.5	291.842			293.475	4.45566			23.5	288.901			293.446	5.04206			23.5	293.002			293.459	4.89083			23.5	290.151			293.366	4.41888			23.5	296.731			293.536	4.55618
		24	292.412			293.495	4.28263			24	287.377			293.471	4.45727			24	301.665			293.487	5.03823			24	292.551			293.433	4.90643			24	300.461			293.353	4.43224			24	296.532			293.522	4.55061
		24.5	289.751			293.482	4.29007			24.5	293.322			293.539	4.4675			24.5	295.018			293.457	5.00738			24.5	292.807			293.453	4.91064			24.5	288.954			293.336	4.41091			24.5	298.997			293.52	4.54929
		25	299.162			293.496	4.28233			25	298.778			293.519	4.47695			25	296.169			293.458	5.0077			25	292.205			293.459	4.9107			25	294.879			293.333	4.41423			25	294.794			293.461	4.55351
		25.5	290.6			293.461	4.26444			25.5	292.11			293.492	4.46142			25.5	291.028			293.464	5.0115			25.5	293.674			293.491	4.92337			25.5	298.734			293.309	4.41845			25.5	300.814			293.466	4.55564
		26	290.799			293.466	4.26182			26	295.314			293.515	4.46576			26	288.976			293.493	5.01381			26	292.097			293.511	4.93199			26	290.731			293.297	4.40632			26	293.604			293.427	4.52559
		26.5	291.661			293.47	4.25958			26.5	297.424			293.475	4.48473			26.5	295.068			293.506	5.00544			26.5	295.115			293.5	4.93787			26.5	295.095			293.305	4.40299			26.5	294.959			293.432	4.52647
		27	290.152			293.477	4.25772			27	293.843			293.474	4.48333			27	298.393			293.526	5.02044			27	293.017			293.538	4.97946			27	296.392			293.301	4.40176			27	290.873			293.435	4.52784
		27.5	288.83			293.479	4.25648			27.5	290.15			293.461	4.48604			27.5	289.995			293.505	5.00871			27.5	288.888			293.52	4.98733			27.5	288.084			293.288	4.39635			27.5	294.395			293.435	4.52787
		28	294.543			293.497	4.24437			28	294.22			293.478	4.4799			28	296.741			293.524	5.00255			28	297.301			293.585	5.01062			28	293.831			293.309	4.3813			28	297.086			293.448	4.53412
		28.5	291.665			293.49	4.24382			28.5	297.403			293.478	4.47988			28.5	293.217			293.512	4.99769			28.5	291.873			293.559	5.00467			28.5	291.914			293.32	4.38559			28.5	287.415			293.421	4.5285
		29	295.528			293.499	4.24185			29	294.557			293.454	4.47157			29	294.199			293.514	4.99765			29	294.349			293.562	5.0039			29	296.175			293.301	4.40048			29	296.152			293.467	4.5141
		29.5	292.319			293.493	4.23983			29.5	291.484			293.446	4.47106			29.5	296.739			293.517	4.99824			29.5	294.048			293.565	5.0045			29.5	290.266			293.288	4.39577			29.5	293.21			293.419	4.53591
		30	289.78			293.493	4.23968			30	294.253			293.477	4.47922			30	293.325			293.52	5.00041			30	290.692			293.532	5.02277			30	292.754			293.328	4.40532			30	288.81			293.43	4.53801
		30.5	295.685			293.486	4.24669			30.5	293.501			293.445	4.49748			30.5	289.471			293.491	5.01779			30.5	291.075			293.535	5.0214			30.5	293.492			293.296	4.43242			30.5	296.534			293.445	4.5277
		31	292.367			293.484	4.24568			31	292.145			293.467	4.50946			31	300.938			293.529	5.01597			31	297.637			293.57	5.02927			31	292.65			293.304	4.43391			31	294.106			293.397	4.54556
		31.5	293.326			293.509	4.25318			31.5	297.436			293.466	4.50978			31.5	293.061			293.493	4.98828			31.5	296.209			293.533	5.02658			31.5	293.254			293.314	4.43484			31.5	289.912			293.425	4.56729
		32	293.115			293.535	4.26806			32	290.056			293.455	4.50276			32	298.102			293.477	4.99447			32	290.769			293.543	5.03352			32	290.705			293.31	4.43526			32	292.782			293.415	4.57752
		32.5	293.136			293.505	4.29211			32.5	291.567			293.468	4.49671			32.5	290.623			293.483	5.00057			32.5	292.564			293.574	5.03543			32.5	288.112			293.332	4.43292			32.5	289.248			293.447	4.59526
		33	295.706			293.496	4.29449			33	295.785			293.467	4.49722			33	296.65			293.46	5.02464			33	298.409			293.581	5.03502			33	294.445			293.331	4.43396			33	294.313			293.456	4.5885
		33.5	291.832			293.491	4.29249			33.5	294.491			293.494	4.52745			33.5	288.493			293.48	5.04475			33.5	292.072			293.567	5.02554			33.5	298.57			293.35	4.44776			33.5	295.912			293.438	4.59217
		34	297.672			293.477	4.30306			34	293.917			293.489	4.52691			34	297.692			293.48	5.04441			34	292.63			293.552	5.03448			34	291.791			293.314	4.43482			34	289.131			293.451	4.60225
		34.5	293.518			293.454	4.29289			34.5	290.254			293.475	4.53033			34.5	296.455			293.475	5.04052			34.5	294.41			293.56	5.03432			34.5	292.607			293.32	4.43353			34.5	295.317			293.447	4.60625
		35	299.349			293.467	4.29698			35	296.924			293.503	4.52795			35	294.874			293.479	5.04369			35	295.396			293.566	5.03585			35	290.201			293.337	4.43726			35	290.405			293.441	4.60456
		35.5	296.025			293.42	4.28389			35.5	289.662			293.478	4.52282			35.5	289.664			293.46	5.04575			35.5	293.757			293.542	5.03833			35.5	290.85			293.328	4.44545			35.5	291.514			293.46	4.59989
		36	295.286			293.416	4.28184			36	292.543			293.5	4.51489			36	295.622			293.488	5.04018			36	296.774			293.575	5.0607			36	293.508			293.373	4.46538			36	298.967			293.463	4.59885
		36.5	297.231			293.403	4.27997			36.5	294.825			293.498	4.51529			36.5	290.19			293.479	5.03795			36.5	286.528			293.538	5.06409			36.5	292.309			293.37	4.46548			36.5	289.385			293.463	4.5988
		37	294.768			293.371	4.27561			37	296.417			293.482	4.51639			37	290.194			293.463	5.0528			37	297.041			293.586	5.04268			37	297.952			293.378	4.46503			37	296.039			293.474	4.59179
		37.5	288.267			293.394	4.29556			37.5	291.228			293.479	4.51483			37.5	297.045			293.491	5.05003			37.5	291.563			293.584	5.04158			37.5	291.368			293.359	4.45363			37.5	296.008			293.485	4.60049
		38	295.388			293.418	4.2802			38	293.821			293.46	4.53251			38	289.57			293.432	5.077			38	293.82			293.585	5.041			38	295.461			293.343	4.46732			38	293.996			293.495	4.60852
		38.5	298.316			293.413	4.27843			38.5	295.857			293.452	4.53324			38.5	293.839			293.47	5.07647			38.5	298.754			293.586	5.04106			38.5	295.737			293.347	4.46986			38.5	295.312			293.509	4.61424
		39	293.079			293.406	4.2716			39	294.705			293.422	4.53785			39	295.639			293.476	5.07754			39	288.106			293.539	5.03688			39	292.947			293.333	4.46674			39	289.211			293.503	4.61261
		39.5	295.011			293.401	4.27253			39.5	293.781			293.392	4.54877			39.5	291.606			293.459	5.07606			39.5	296.793			293.563	5.02228			39.5	291.866			293.342	4.46775			39.5	290.873			293.522	4.60257
		40	291.873			293.409	4.2769			40	295.568			293.408	4.55605			40	292.409			293.497	5.09072			40	293.533			293.566	5.02404			40	294.331			293.356	4.4675			40	294.783			293.513	4.60946
		40.5	295.229			293.391	4.29159			40.5	294.454			293.392	4.55407			40.5	291.993			293.485	5.09597			40.5	292.233			293.553	5.02777			40.5	291.372			293.353	4.46703			40.5	288.256			293.538	4.62919
		41	295.181			293.374	4.29086			41	294.888			293.397	4.55575			41	292.953			293.503	5.09693			41	295.952			293.591	5.0467			41	292.353			293.367	4.46523			41	293.85			293.546	4.62111
		41.5	290.132			293.385	4.29851			41.5	291.752			293.38	4.55691			41.5	294.366			293.514	5.09813			41.5	286.119			293.607	5.05961			41.5	292.264			293.374	4.4647			41.5	292.557			293.553	4.6228
		42	296.636			293.386	4.29794			42	294.551			293.377	4.55792			42	297.292			293.481	5.11419			42	300.465			293.607	5.05889			42	300.472			293.391	4.46715			42	295.862			293.571	4.62558
		42.5	293.48			293.387	4.29834			42.5	293.163			293.415	4.59965			42.5	291.574			293.456	5.10757			42.5	293.697			293.593	5.04326			42.5	291.674			293.36	4.43911			42.5	292.874			293.497	4.7058
		43	294.038			293.394	4.2999			43	292.377			293.375	4.63663			43	295.356			293.458	5.10712			43	290.894			293.567	5.05614			43	290.823			293.368	4.4375			43	295.224			293.538	4.73683
		43.5	296.854			293.362	4.31978			43.5	293.059			293.426	4.68168			43.5	295.344			293.422	5.11828			43.5	295.245			293.607	5.06686			43.5	299.592			293.391	4.43633			43.5	294.078			293.504	4.74912
		44	295.579			293.373	4.33126			44	294.363			293.426	4.68167			44	295.22			293.449	5.14263			44	289.493			293.592	5.06642			44	288.541			293.369	4.41634			44	294.435			293.488	4.75258
		44.5	296.721			293.337	4.34204			44.5	294.37			293.416	4.68188			44.5	294.771			293.437	5.14133			44.5	293.074			293.595	5.06442			44.5	292.222			293.425	4.42499			44.5	293.733			293.517	4.77583
		45	289.655			293.329	4.33719			45	296.652			293.442	4.7012			45	296.227			293.433	5.1406			45	294.939			293.618	5.07269			45	295.879			293.408	4.43555			45	295.638			293.464	4.83244
		45.5	294.071			293.363	4.33471			45.5	292.816			293.424	4.69578			45.5	291.433			293.445	5.14957			45.5	291.384			293.608	5.07204			45.5	293.641			293.415	4.4401			45.5	293.982			293.488	4.85609
		46	297.999			293.351	4.33588			46	295.175			293.419	4.69689			46	294.575			293.453	5.14767			46	295.251			293.588	5.08944			46	295.829			293.398	4.44565			46	291.161			293.514	4.8715
		46.5	293.486			293.355	4.34077			46.5	291.211			293.416	4.69595			46.5	296.385			293.454	5.14797			46.5	286.691			293.602	5.09865			46.5	290.418			293.382	4.44252			46.5	294.725			293.498	4.88392
		47	292.619			293.338	4.34719			47	293.446			293.404	4.70475			47	291.022			293.426	5.14686			47	291.867			293.633	5.07532			47	297.954			293.367	4.45818			47	289.471			293.511	4.89057
		47.5	292.291			293.331	4.3497			47.5	298.474			293.405	4.70479			47.5	291.419			293.412	5.15725			47.5	298.469			293.638	5.07405			47.5	292.906			293.351	4.44722			47.5	289.583			293.504	4.89749
		48	296.149			293.37	4.37582			48	293.244			293.389	4.69288			48	296.446			293.447	5.16739			48	290.556			293.629	5.06665			48	296.258			293.35	4.44727			48	299.207			293.509	4.89402
		48.5	289.452			293.351	4.37193			48.5	293.38			293.371	4.70042			48.5	292.01			293.394	5.1917			48.5	297.302			293.645	5.06199			48.5	295.221			293.345	4.44449			48.5	290.248			293.487	4.87823
		49	293.975			293.398	4.38036			49	296.599			293.384	4.70441			49	305.274			293.425	5.20219			49	290.805			293.623	5.05557			49	294.304			293.347	4.44572			49	294.803			293.486	4.87903
		49.5	291.94			293.367	4.39839			49.5	296.259			293.353	4.70382			49.5	290.288			293.366	5.13359			49.5	293.424			293.632	5.0523			49.5	294.909			293.353	4.44759			49.5	296.15			293.491	4.88102
		50	293.885			293.368	4.3981			50	293.263			293.338	4.69932			50	295.167			293.34	5.16204			50	296.563			293.622	5.0544			50	300.265			293.35	4.44672			50	293.297			293.48	4.87741
		50.5	301.361			293.365	4.39795			50.5	288.127			293.338	4.69932			50.5	297.917			293.356	5.17291			50.5	291.171			293.639	5.06935			50.5	288.154			293.324	4.42116			50.5	293.45			293.493	4.88056
		51	288.169			293.299	4.37635			51	293.209			293.367	4.68495			51	290.163			293.325	5.16419			51	292.919			293.628	5.0774			51	294.309			293.335	4.41062			51	291.969			293.48	4.88423
		51.5	296.803			293.326	4.36122			51.5	292.843			293.361	4.68573			51.5	293.247			293.351	5.16147			51.5	289.666			293.649	5.08372			51.5	292.413			293.348	4.41739			51.5	294.778			293.472	4.88781
		52	291.88			293.326	4.3613			52	291.715			293.352	4.68879			52	289.267			293.347	5.1619			52	294.657			293.66	5.07769			52	297.575			293.355	4.41695			52	292.158			293.473	4.88795
		52.5	293.621			293.308	4.37493			52.5	297.496			293.327	4.71032			52.5	294.344			293.376	5.15517			52.5	294.699			293.662	5.07837			52.5	291.933			293.351	4.41374			52.5	292.414			293.458	4.89664
		53	295.171			293.331	4.38931			53	297.009			293.346	4.73551			53	295.213			293.401	5.17117			53	291.228			293.649	5.07922			53	294.382			293.352	4.41344			53	290.295			293.446	4.90159
		53.5	288.4			293.306	4.39327			53.5	293.884			293.296	4.75069			53.5	288.927			293.384	5.17055			53.5	298.888			293.653	5.07758			53.5	297.413			293.342	4.41333			53.5	292.921			293.479	4.90199
		54	295.763			293.322	4.38109			54	294.229			293.304	4.75321			54	297.258			293.407	5.16084			54	295.474			293.609	5.07029			54	291.767			293.326	4.40432			54	296.198			293.47	4.90459
		54.5	293.719			293.322	4.38093			54.5	293.754			293.309	4.75487			54.5	290.849			293.404	5.15874			54.5	292.028			293.599	5.06859			54.5	294.812			293.352	4.41043			54.5	296.423			293.465	4.9022
		55	294.757			293.3	4.38993			55	293.934			293.313	4.75555			55	293.835			293.426	5.15715			55	299.751			293.585	5.07634			55	298.267			293.34	4.40977			55	296.738			293.443	4.89874
		55.5	296.56			293.305	4.39205			55.5	291.446			293.294	4.76079			55.5	293.956			293.441	5.16285			55.5	293.402			293.553	5.0575			55.5	290.114			293.33	4.40089			55.5	290.421			293.433	4.89427
		56	296.44			293.265	4.39819			56	292.631			293.334	4.77855			56	295.426			293.45	5.16529			56	291.311			293.578	5.06842			56	293.823			293.344	4.39512			56	293.867			293.445	4.88981
		56.5	292.351			293.24	4.39434			56.5	291.22			293.342	4.77873			56.5	295.614			293.455	5.16782			56.5	293.494			293.585	5.06616			56.5	293.234			293.318	4.40769			56.5	290.576			293.414	4.90738
		57	298.107			293.258	4.39789			57	294.425			293.362	4.77827			57	302.554			293.457	5.16856			57	291.074			293.592	5.06708			57	293.618			293.34	4.41878			57	300.319			293.454	4.91676
		57.5	290.601			293.209	4.39881			57.5	303.64			293.372	4.78279			57.5	292.332			293.426	5.13267			57.5	292.606			293.61	5.06452			57.5	299.662			293.335	4.4191			57.5	290.426			293.403	4.89758
		58	296.432			293.21	4.39812			58	289.486			293.317	4.72741			58	291.381			293.454	5.14161			58	292.778			293.625	5.06596			58	289.759			293.282	4.40573			58	292.363			293.414	4.89341
		58.5	292.533			293.194	4.39219			58.5	297.833			293.349	4.72293			58.5	290.027			293.446	5.14613			58.5	295.019			293.624	5.06629			58.5	297.43			293.313	4.4027			58.5	292.3			293.435	4.89805
		59	300.108			293.18	4.3984			59	296.095			293.323	4.71248			59	291.055			293.465	5.14043			59	293.325			293.62	5.06556			59	293.924			293.298	4.39359			59	296.138			293.407	4.91971
		59.5	292.197			293.164	4.37843			59.5	285.673			293.291	4.71514			59.5	289.049			293.499	5.14744			59.5	294.796			293.622	5.06552			59.5	293.051			293.321	4.40948			59.5	293.807			293.427	4.93784
		60	295.317			293.171	4.37798			60	300.427			293.33	4.68412			60	298.06			293.523	5.13773			60	295.583			293.631	5.06943			60	292.42			293.308	4.41454			60	290.198			293.396	4.95442
		60.5	294.695			293.148	4.37859			60.5	286.938			293.279	4.66227			60.5	288.46			293.523	5.13838			60.5	287.532			293.652	5.08571			60.5	289.573			293.3	4.41728			60.5	291.59			293.42	4.95038
		61	296.808			293.163	4.38852			61	294.348			293.314	4.64082			61	296.153			293.545	5.12606			61	294.014			293.705	5.07722			61	299.371			293.335	4.41503			61	293.224			293.432	4.94885
		61.5	290.303			293.126	4.38825			61.5	293.74			293.321	4.64373			61.5	293.991			293.532	5.12271			61.5	294.387			293.676	5.09221			61.5	288.53			293.253	4.45531			61.5	293.807			293.417	4.95429
		62	299.633			293.175	4.41153			62	291.767			293.291	4.66078			62	290.537			293.571	5.15626			62	292.581			293.692	5.09948			62	293.494			293.3	4.45553			62	296.071			293.428	4.95756
		62.5	286.365			293.139	4.38812			62.5	292.076			293.339	4.69407			62.5	299.748			293.58	5.15243			62.5	288.989			293.695	5.09893			62.5	296.869			293.272	4.47268			62.5	292.72			293.42	4.95466
		63	297.299			293.183	4.36395			63	293.607			293.348	4.69339			63	292.722			293.567	5.13973			63	294.159			293.697	5.0979			63	289.038			293.258	4.46583			63	293.726			293.423	4.95443
		63.5	291.41			293.174	4.35753			63.5	286.781			293.31	4.72178			63.5	295.147			293.567	5.13976			63.5	290.195			293.715	5.10642			63.5	296.218			293.297	4.46312			63.5	294.675			293.451	4.97206
		64	290.916			293.166	4.36257			64	298.84			293.369	4.71377			64	288.607			293.553	5.13915			64	297.642			293.734	5.10036			64	288.24			293.28	4.45843			64	295.417			293.448	4.97154
		64.5	293.868			293.174	4.35985			64.5	285.096			293.303	4.72957			64.5	290.013			293.591	5.13059			64.5	293.434			293.716	5.09289			64.5	292.952			293.307	4.44407			64.5	289.344			293.431	4.9705
		65	288.733			293.188	4.367			65	293.516			293.377	4.71648			65	300.143			293.593	5.12956			65	295.091			293.732	5.09679			65	295.371			293.293	4.44954			65	294.913			293.474	4.97178
		65.5	294.062			293.217	4.35643			65.5	294.917			293.368	4.71798			65.5	290.658			293.563	5.10858			65.5	294.964			293.739	5.09963			65.5	295.428			293.266	4.45318			65.5	287.57			293.462	4.97127
		66	293.753			293.19	4.36812			66	292.011			293.357	4.71689			66	292.529			293.58	5.10448			66	294.038			293.742	5.10056			66	293.838			293.266	4.4529			66	296.337			293.492	4.95354
		66.5	292.028			293.195	4.36957			66.5	295.408			293.369	4.71657			66.5	294.87			293.588	5.10415			66.5	288.773			293.754	5.10389			66.5	293.843			293.251	4.45608			66.5	294.228			293.473	4.9499
		67	295.68			293.185	4.37499			67	294.324			293.357	4.71442			67	292.244			293.593	5.10581			67	296.959			293.778	5.09166			67	296.628			293.25	4.45602			67	291.527			293.444	4.96282
		67.5	285.473			293.163	4.37351			67.5	288.07			293.372	4.72178			67.5	295.686			293.599	5.10492			67.5	291.037			293.76	5.08677			67.5	294.569			293.227	4.45051			67.5	298.202			293.461	4.96226
		68	298.054			293.195	4.34038			68	294.116			293.414	4.71194			68	289.35			293.59	5.10279			68	293.131			293.78	5.08376			68	298.448			293.228	4.45098			68	290.525			293.435	4.95088
		68.5	292.883			293.181	4.32938			68.5	291.942			293.43	4.71958			68.5	295.149			293.599	5.09688			68.5	294.491			293.789	5.08426			68.5	289.208			293.222	4.44443			68.5	296.967			293.448	4.9466
		69	288.008			293.196	4.33349			69	295.726			293.436	4.71844			69	297.506			293.59	5.09571			69	293.44			293.785	5.08402			69	296.123			293.227	4.44003			69	296.628			293.444	4.94413
		69.5	300.646			293.217	4.31836			69.5	290.494			293.411	4.71939			69.5	287.964			293.568	5.08822			69.5	292.401			293.807	5.09138			69.5	293.461			293.201	4.43848			69.5	285.24			293.421	4.93974
		70	288.044			293.184	4.28646			70	296.819			293.426	4.71486			70	298.958			293.584	5.07541			70	293.212			293.856	5.12506			70	287.632			293.204	4.43883			70	296.607			293.488	4.91833
		70.5	296.62			293.219	4.27293			70.5	292.531			293.429	4.71732			70.5	288.409			293.592	5.08497			70.5	292.091			293.855	5.12518			70.5	296.919			293.212	4.43043			70.5	290.948			293.434	4.94248
		71	293.261			293.196	4.26681			71	294.547			293.451	4.72346			71	291.029			293.618	5.07161			71	296.193			293.89	5.13695			71	293.365			293.224	4.445			71	293.332			293.48	4.9607
		71.5	288.416			293.206	4.2691			71.5	293.468			293.433	4.72648			71.5	300.851			293.643	5.07126			71.5	291.349			293.87	5.13574			71.5	291.206			293.232	4.44662			71.5	291.741			293.47	4.96294
		72	296.794			293.245	4.2609			72	291.174			293.438	4.72718			72	283.796			293.609	5.0454			72	297.935			293.877	5.13323			72	294.659			293.229	4.4481			72	297.552			293.476	4.9615
		72.5	287.023			293.207	4.26288			72.5	291.187			293.44	4.72656			72.5	295.249			293.668	4.99902			72.5	289.553			293.866	5.12693			72.5	289.029			293.23	4.44814			72.5	292.663			293.456	4.95301
		73	294.682			293.249	4.2429			73	291.264			293.442	4.72572			73	294.477			293.665	4.99824			73	297.038			293.852	5.14202			73	291.233			293.234	4.44422			73	295.953			293.46	4.95269
		73.5	295.315			293.254	4.24532			73.5	296.273			293.466	4.72712			73.5	290.338			293.645	5.00336			73.5	292.745			293.837	5.13707			73.5	291.652			293.233	4.44479			73.5	297.741			293.466	4.95592
		74	289.671			293.264	4.25235			74	293.778			293.447	4.72353			74	298.539			293.67	4.99932			74	292.322			293.84	5.13657			74	292.635			293.253	4.44665			74	297.755			293.452	4.9477
		74.5	292.293			293.299	4.2519			74.5	295.244			293.459	4.72791			74.5	288.127			293.635	4.98957			74.5	296.017			293.838	5.1372			74.5	287.185			293.238	4.45409			74.5	295.956			293.418	4.9409
		75	295.701			293.281	4.26424			75	297.309			293.451	4.72622			75	298.888			293.655	4.97533			75	299.049			293.823	5.13532			75	293.468			293.263	4.43396			75	294.973			293.416	4.9397
		75.5	290.287			293.25	4.26878			75.5	294.967			293.413	4.72591			75.5	296.492			293.642	4.96506			75.5	291.136			293.8	5.12213			75.5	292.793			293.25	4.43683			75.5	296.506			293.381	4.95304
		76	296.277			293.267	4.26372			76	294.086			293.401	4.72495			76	290.331			293.634	4.96161			76	299.494			293.818	5.11916			76	292.781			293.226	4.4527			76	292.742			293.375	4.94993
		76.5	286.199			293.24	4.26182			76.5	293.38			293.393	4.72518			76.5	299.628			293.662	4.95886			76.5	293.806			293.804	5.10738			76.5	291.106			293.242	4.4568			76.5	293.981			293.408	4.96752
		77	300.834			293.313	4.2669			77	288.561			293.396	4.72535			77	287.075			293.644	4.94356			77	291.479			293.807	5.10755			77	291.932			293.256	4.45443			77	292.142			293.365	4.99904
		77.5	292.633			293.281	4.23403			77.5	294.439			293.398	4.72305			77.5	297.711			293.644	4.94374			77.5	293.523			293.834	5.10965			77.5	289.199			293.26	4.45354			77.5	295.505			293.383	5.00097
		78	291.46			293.266	4.24155			78	290.78			293.384	4.7242			78	291.985			293.669	4.9776			78	293.619			293.812	5.12063			78	298.282			293.264	4.45056			78	293.638			293.372	4.99868
		78.5	295.153			293.292	4.24672			78.5	293.426			293.452	4.78416			78.5	291.605			293.656	4.98554			78.5	294.908			293.82	5.12166			78.5	287.992			293.213	4.45113			78.5	295.94			293.378	4.99982
		79	286.594			293.273	4.24695			79	292.765			293.441	4.78677			79	297.202			293.665	4.98345			79	289.57			293.78	5.14555			79	291.682			293.286	4.48567			79	291.696			293.404	5.02536
		79.5	295.028			293.315	4.22239			79.5	286.643			293.421	4.79741			79.5	288.611			293.678	4.99666			79.5	292.337			293.8	5.1369			79.5	290.77			293.295	4.48422			79.5	287.816			293.395	5.02997
		80	288.312			293.317	4.22302			80	294.004			293.48	4.78669			80	293.938			293.69	4.98722			80	301.42			293.803	5.13615			80	289.416			293.308	4.48064			80	298.603			293.41	5.01739
		80.5	294.708			293.344	4.2082			80.5	292.297			293.454	4.79834			80.5	291.178			293.702	4.99033			80.5	284.044			293.758	5.10881			80.5	292.805			293.343	4.47781			80.5	287.26			293.389	5.00418
		81	294.18			293.348	4.20993			81	296.245			293.459	4.79765			81	289.926			293.685	5.00434			81	297.686			293.794	5.065			81	291.176			293.359	4.48129			81	298.226			293.421	4.98514
		81.5	291.036			293.356	4.21311			81.5	289.28			293.439	4.7944			81.5	297.219			293.698	4.99791			81.5	292.495			293.768	5.05836			81.5	297.62			293.383	4.48238			81.5	291.285			293.411	4.97737
		82	291.356			293.361	4.21104			82	293.772			293.442	4.7917			82	289.324			293.703	5.00172			82	290.337			293.763	5.06022			82	290.237			293.367	4.47289			82	296.01			293.433	4.97764
		82.5	291.512			293.383	4.21202			82.5	297.853			293.438	4.79181			82.5	299.179			293.726	4.99207			82.5	302.283			293.801	5.06271			82.5	293.43			293.36	4.4788			82.5	292.317			293.409	4.97684
		83	291.55			293.39	4.21001			83	293.371			293.41	4.78223			83	291.423			293.689	4.9789			83	291.481			293.758	5.02688			83	295.845			293.367	4.47989			83	293.773			293.426	4.97889
		83.5	294.735			293.417	4.21569			83.5	292.385			293.41	4.78225			83.5	290.171			293.701	4.97632			83.5	296.487			293.749	5.03233			83.5	287.313			293.335	4.48468			83.5	298.579			293.421	4.97901
		84	294.477			293.436	4.23008			84	298.439			293.423	4.78328			84	296.459			293.717	4.97008			84	291.909			293.733	5.02876			84	294.509			293.377	4.46739			84	289.136			293.371	4.97747
		84.5	292.707			293.434	4.22964			84.5	284.949			293.38	4.77733			84.5	286.922			293.714	4.96878			84.5	283.529			293.732	5.0289			84.5	293.591			293.352	4.47566			84.5	296.182			293.404	4.97116
		85	294.468			293.444	4.23018			85	297.786			293.433	4.74265			85	294.367			293.732	4.95072			85	299.25			293.776	4.9778			85	292.337			293.363	4.47945			85	294.029			293.388	4.96731
		85.5	290.503			293.458	4.23836			85.5	290.639			293.395	4.73829			85.5	293.661			293.731	4.95063			85.5	292.022			293.714	4.98631			85.5	294.098			293.344	4.49225			85.5	290.951			293.411	4.98144
		86	293.771			293.491	4.24107			86	290.853			293.401	4.73564			86	287.766			293.74	4.95216			86	295.194			293.711	4.9876			86	291.543			293.352	4.49524			86	293.499			293.438	4.98225
		86.5	295.047			293.507	4.24861			86.5	301.754			293.423	4.73388			86.5	301.781			293.744	4.94756			86.5	298.025			293.712	4.98801			86.5	291.802			293.357	4.49381			86.5	289.667			293.42	4.9885
		87	290.599			293.509	4.24909			87	296.011			293.367	4.70132			87	293.252			293.72	4.91969			87	289.42			293.667	4.98952			87	298.557			293.383	4.49926			87	298.489			293.439	4.98133
		87.5	298.594			293.526	4.2443			87.5	289.678			293.357	4.69781			87.5	296.182			293.708	4.92361			87.5	296.207			293.7	4.98292			87.5	285.265			293.36	4.48441			87.5	289.214			293.408	4.96878
		88	289.518			293.533	4.25332			88	298.968			293.374	4.69057			88	298.997			293.693	4.92065			88	293.975			293.681	4.98042			88	296.29			293.382	4.45466			88	293.748			293.438	4.96134
		88.5	297.98			293.554	4.24382			88.5	292.318			293.346	4.67378			88.5	290.863			293.663	4.90638			88.5	288.879			293.674	4.981			88.5	286.035			293.372	4.45028			88.5	291.742			293.423	4.96485
		89	293.94			293.558	4.24885			89	298.299			293.37	4.68036			89	300.905			293.672	4.90296			89	297.327			293.716	4.97546			89	294.911			293.388	4.42929			89	296.802			293.437	4.96391
		89.5	293.2			293.56	4.24902			89.5	284.329			293.331	4.67168			89.5	292.379			293.647	4.87865			89.5	290.808			293.701	4.96909			89.5	294.52			293.369	4.43115			89.5	293.772			293.427	4.95918
		90	297.105			293.558	4.24928			90	292.974			293.392	4.63326			90	290.297			293.646	4.87889			90	295.186			293.717	4.9649			90	289.882			293.373	4.43261			90	291.916			293.423	4.95922
		90.5	293.893			293.577	4.27441			90.5	293.463			293.404	4.63535			90.5	301.179			293.634	4.88968			90.5	293.831			293.723	4.9676			90.5	299.107			293.392	4.42574			90.5	289.642			293.443	4.96083
		91	291.133			293.529	4.32448			91	287.132			293.396	4.63653			91	289.931			293.565	4.88077			91	290.74			293.706	4.97325			91	290.519			293.377	4.41108			91	296.032			293.48	4.96036
		91.5	293.299			293.554	4.32494			91.5	294.448			293.425	4.61534			91.5	294.475			293.573	4.87584			91.5	296.997			293.742	4.97759			91.5	291.021			293.382	4.4081			91.5	288.744			293.465	4.95715
		92	289.914			293.568	4.32846			92	290.149			293.425	4.61544			92	291.829			293.585	4.88088			92	291.892			293.699	4.98584			92	297.347			293.4	4.40556			92	295.247			293.48	4.94729
		92.5	291.698			293.573	4.32462			92.5	294.224			293.443	4.6096			92.5	290.832			293.565	4.89631			92.5	300.932			293.708	4.98419			92.5	284.401			293.382	4.39669			92.5	287.332			293.487	4.95045
		93	293.344			293.592	4.32455			93	295.681			293.423	4.61454			93	299.204			293.588	4.89408			93	293.992			293.68	4.95905			93	297.426			293.41	4.35625			93	294.417			293.505	4.93424
		93.5	294.107			293.572	4.33435			93.5	292.207			293.398	4.61581			93.5	288.309			293.545	4.88242			93.5	291.191			293.652	4.97274			93.5	287.552			293.388	4.34705			93.5	296.23			293.511	4.93608
		94	295.852			293.563	4.33525			94	295.74			293.424	4.62367			94	300.019			293.588	4.87421			94	287.733			293.661	4.96988			94	293.086			293.427	4.32963			94	296.825			293.479	4.93913
		94.5	296.08			293.548	4.33251			94.5	287.878			293.393	4.62938			94.5	295.067			293.539	4.85833			94.5	296.736			293.67	4.96064			94.5	297.861			293.403	4.34533			94.5	297.504			293.454	4.93463
		95	296.536			293.526	4.33051			95	298.295			293.44	4.62149			95	290.048			293.514	4.86324			95	293.144			293.653	4.95597			95	294.293			293.395	4.33899			95	295.207			293.43	4.92648
		95.5	295.123			293.524	4.32901			95.5	290.357			293.395	4.61772			95.5	294.872			293.549	4.8629			95.5	295.827			293.638	4.96196			95.5	300.402			293.402	4.34161			95.5	291.147			293.399	4.93427
		96	292.595			293.526	4.32976			96	291.086			293.407	4.61302			96	292.48			293.554	4.86481			96	289.766			293.609	4.96644			96	295.074			293.345	4.32449			96	294.744			293.436	4.94434
		96.5	289.944			293.541	4.33183			96.5	297.092			293.457	4.64199			96.5	294.686			293.548	4.86679			96.5	290.634			293.629	4.95901			96.5	291.943			293.332	4.32308			96.5	287.086			293.421	4.94487
		97	298.545			293.576	4.33109			97	292.356			293.444	4.63545			97	289.82			293.564	4.87598			97	300.952			293.63	4.95888			97	300.884			293.356	4.32826			97	300.41			293.457	4.92471
		97.5	287.532			293.558	4.31773			97.5	291.468			293.43	4.64261			97.5	292.142			293.565	4.8756			97.5	295.801			293.595	4.93168			97.5	288.609			293.294	4.30902			97.5	288.542			293.437	4.90386
		98	294.721			293.578	4.29907			98	294.851			293.471	4.66123			98	290.203			293.564	4.87567			98	289.624			293.595	4.9319			98	299.747			293.32	4.29635			98	287.935			293.454	4.89255
		98.5	296.486			293.572	4.29831			98.5	297.099			293.437	4.67617			98.5	296.248			293.603	4.8797			98.5	299.384			293.635	4.93251			98.5	290.947			293.273	4.27724			98.5	297.09			293.483	4.87677
		99	292.396			293.542	4.29876			99	292.309			293.433	4.67377			99	298.894			293.579	4.87853			99	291.142			293.596	4.91819			99	292.116			293.28	4.27449			99	293.788			293.469	4.8703
		99.5	300.04			293.542	4.29864			99.5	294.836			293.436	4.67334			99.5	291.011			293.571	4.87109			99.5	293.295			293.632	4.9272			99.5	295.047			293.282	4.27402			99.5	291.029			293.46	4.87131
		100	291.462			293.486	4.28787			100	298.707			293.439	4.67441			100	296.825			293.576	4.86899			100	295.538			293.633	4.92717			100	287.387			293.304	4.29416			100	295.473			293.488	4.87316
		100.5	272.451			293.504	4.28728			100.5	271.709			293.419	4.66047			100.5	270.557			293.549	4.86589			100.5	271.21			293.612	4.92811			100.5	275.784			293.316	4.28134			100.5	271.468			293.491	4.8746
		101	305.656			293.598	4.02233			101	303.868			293.524	4.3993			101	298.543			293.568	4.86135			101	296.536			293.733	4.66706			101	297.24			293.355	4.30708			101	297.274			293.457	4.88668
		101.5	297.014			293.531	3.93171			101.5	301.538			293.47	4.33797			101.5	299.835			293.659	4.59218			101.5	304.732			293.725	4.66355			101.5	304.302			293.433	4.12562			101.5	304.75			293.471	4.87898
		102	280.173			293.539	3.94063			102	279.699			293.431	4.30013			102	272.652			293.629	4.57972			102	271.889			293.708	4.62991			102	275.276			293.401	4.12063			102	273.237			293.557	4.63569
		102.5	308.57			293.592	3.83045			102.5	312.952			293.495	4.18891			102.5	308.727			293.602	4.55879			102.5	314.298			293.822	4.36443			102.5	311.342			293.359	4.05153			102.5	309.547			293.533	4.6289
		103	284.568			293.526	3.68252			103	288.201			293.418	3.9655			103	282.402			293.688	4.31778			103	285.981			293.732	4.12017			103	285.078			293.44	3.84602			103	284.357			293.458	4.56822
		103.5	293.912			293.566	3.62805			103.5	285.996			293.414	3.97121			103.5	294.461			293.606	4.18531			103.5	291.758			293.78	4.08506			103.5	287.079			293.356	3.63152			103.5	284.988			293.569	4.34009
		104	302.34			293.547	3.63588			104	305.087			293.471	3.94603			104	308.237			293.649	4.11324			104	309.148			293.772	4.09039			104	305.261			293.389	3.5856			104	306.172			293.469	4.19924
		104.5	281.542			293.511	3.58393			104.5	283.935			293.421	3.86093			104.5	276.596			293.654	4.11484			104.5	276.768			293.695	3.9425			104.5	280.898			293.401	3.5691			104.5	276.478			293.53	4.1549
		105	307.816			293.557	3.48768			105	303.099			293.469	3.80194			105	302.092			293.579	3.98308			105	303.218			293.76	3.76602			105	301.465			293.369	3.49093			105	304.95			293.551	4.12243
		105.5	295.789			293.522	3.37773			105.5	292.644			293.42	3.74017			105.5	291.663			293.647	3.80422			105.5	293.347			293.681	3.73319			105.5	291.754			293.418	3.38232			105.5	291.183			293.482	4.025
		106	289.875			293.518	3.37543			106	288.734			293.403	3.75156			106	287.952			293.612	3.7582			106	285.096			293.69	3.7346			106	288.326			293.378	3.33387			106	289.179			293.57	3.84057
		106.5	296.506			293.529	3.36701			106.5	302.999			293.431	3.73735			106.5	306.119			293.623	3.7557			106.5	303.951			293.719	3.69005			106.5	303.339			293.396	3.33502			106.5	304.508			293.502	3.75865
		107	295.233			293.537	3.37519			107	284.749			293.361	3.68779			107	288.01			293.622	3.75619			107	282.839			293.682	3.62372			107	284.031			293.435	3.32081			107	282.447			293.522	3.75695
		107.5	291.033			293.508	3.38459			107.5	293.538			293.409	3.63756			107.5	294.182			293.584	3.6661			107.5	296.996			293.718	3.55121			107.5	302.372			293.401	3.25371			107.5	294.41			293.551	3.7458
		108	298.462			293.526	3.38099			108	295.204			293.426	3.64585			108	300.567			293.597	3.6504			108	300.011			293.69	3.54685			108	293.647			293.464	3.1936			108	293.107			293.483	3.66892
		108.5	288.7			293.52	3.37237			108.5	293.339			293.41	3.645			108.5	285.039			293.61	3.65645			108.5	281.616			293.69	3.54682			108.5	289.08			293.402	3.14035			108.5	288.374			293.567	3.60832
		109	298.269			293.521	3.37098			109	300.92			293.418	3.64652			109	301.242			293.571	3.62338			109	300.031			293.729	3.45571			109	300.071			293.39	3.14405			109	295.927			293.564	3.60785
		109.5	293.814			293.523	3.37478			109.5	289.137			293.373	3.60919			109.5	290.547			293.592	3.5863			109.5	291.742			293.719	3.4399			109.5	292.233			293.411	3.1292			109.5	291.296			293.561	3.60851
		110	293.693			293.524	3.37487			110	292.328			293.396	3.59682			110	289.192			293.572	3.55483			110	291.937			293.738	3.43937			110	293.952			293.391	3.09885			110	293.561			293.588	3.58977
		110.5	294.839			293.474	3.44522			110.5	295.714			293.407	3.59672			110.5	297.982			293.572	3.55536			110.5	295.462			293.722	3.45475			110.5	298.998			293.392	3.0983			110.5	298.379			293.533	3.6394
		111	293.116			293.468	3.44386			111	285.443			293.379	3.5999			111	286.234			293.628	3.57595			111	290.517			293.727	3.45798			111	291.911			293.376	3.1043			111	292.591			293.571	3.65577
		111.5	293.196			293.465	3.44442			111.5	298.658			293.442	3.57076			111.5	295.395			293.61	3.56305			111.5	294.607			293.748	3.45126			111.5	295.69			293.358	3.08199			111.5	297.094			293.584	3.6604
		112	288.955			293.435	3.47223			112	289.73			293.409	3.55283			112	294.438			293.632	3.53076			112	294.216			293.748	3.45125			112	296.181			293.344	3.09493			112	292.494			293.53	3.66965
		112.5	297.761			293.469	3.4619			112.5	290.963			293.414	3.54843			112.5	289.046			293.645	3.54197			112.5	290.184			293.757	3.45508			112.5	296.512			293.344	3.09501			112.5	293.427			293.549	3.67465
		113	295.633			293.436	3.45245			113	296.69			293.424	3.54441			113	296.601			293.643	3.54158			113	295.957			293.755	3.45783			113	293.342			293.317	3.09404			113	296.812			293.501	3.69128
		113.5	292.767			293.425	3.44894			113.5	291.673			293.384	3.55258			113.5	287.131			293.638	3.54842			113.5	294.804			293.764	3.46619			113.5	290.461			293.307	3.08711			113.5	293.783			293.534	3.71274
		114	299.151			293.423	3.44938			114	296.642			293.394	3.55058			114	294.003			293.634	3.54518			114	291.748			293.753	3.46656			114	295.08			293.323	3.096			114	290.41			293.549	3.71808
		114.5	285.507			293.377	3.43429			114.5	293.723			293.367	3.54648			114.5	294.83			293.619	3.57742			114.5	299.54			293.754	3.46566			114.5	294.778			293.313	3.1094			114.5	298.341			293.538	3.71165
		115	291.769			293.442	3.40768			115	291.162			293.38	3.55299			115	285.642			293.63	3.58159			115	294.553			293.736	3.44439			115	294.911			293.323	3.11797			115	290.539			293.564	3.7317
		115.5	296.949			293.441	3.40817			115.5	294.524			293.404	3.55392			115.5	293.287			293.627	3.58097			115.5	289.551			293.702	3.46994			115.5	294.626			293.334	3.12786			115.5	299.137			293.552	3.74551
		116	288.777			293.412	3.40303			116	292.387			293.381	3.5616			116	288.704			293.658	3.53819			116	298.786			293.737	3.46359			116	292.6			293.318	3.1279			116	298.278			293.535	3.7316
		116.5	299.385			293.438	3.38742			116.5	296.338			293.384	3.56099			116.5	291.447			293.678	3.54664			116.5	284.94			293.7	3.44901			116.5	293.743			293.329	3.13568			116.5	296.94			293.543	3.72698
		117	288.818			293.39	3.37138			117	293.261			293.396	3.57532			117	295.801			293.697	3.52979			117	291.983			293.75	3.39384			117	293.344			293.316	3.14347			117	290.849			293.498	3.71374
		117.5	290.4			293.417	3.35641			117.5	292.49			293.385	3.57889			117.5	290.716			293.723	3.53215			117.5	297.693			293.787	3.41367			117.5	295.65			293.321	3.1446			117.5	295.324			293.493	3.70759
		118	294.611			293.434	3.34967			118	298.895			293.416	3.5974			118	289.42			293.71	3.52929			118	290.912			293.748	3.41294			118	293.798			293.333	3.14983			118	297.588			293.469	3.70084
		118.5	289.244			293.428	3.34863			118.5	283.678			293.38	3.5785			118.5	297.628			293.701	3.53983			118.5	294.389			293.773	3.41054			118.5	289.241			293.327	3.14646			118.5	292.293			293.462	3.70642
		119	293.58			293.465	3.34323			119	292.693			293.411	3.52029			119	289.958			293.736	3.53221			119	292.304			293.775	3.41086			119	293.439			293.33	3.14721			119	289.021			293.459	3.70508
		119.5	290.206			293.459	3.34402			119.5	299.236			293.417	3.5201			119.5	290.513			293.71	3.52243			119.5	291.043			293.799	3.41803			119.5	290.377			293.334	3.14302			119.5	296.312			293.417	3.70597
		120	290.434			293.477	3.33609			120	288.241			293.374	3.50128			120	294.192			293.737	3.51408			120	295.263			293.822	3.41477			120	294.064			293.349	3.15156			120	292.534			293.451	3.72726
		120.5	299.751			293.503	3.33284			120.5	298.526			293.404	3.48273			120.5	290.935			293.756	3.50695			120.5	292.212			293.8	3.41927			120.5	291.159			293.379	3.15114			120.5	289.419			293.49	3.72135
		121	288.914			293.46	3.30731			121	289.342			293.38	3.46382			121	295.604			293.739	3.51338			121	291.287			293.825	3.42532			121	295.59			293.376	3.15077			121	296.078			293.46	3.7227
		121.5	295.455			293.518	3.32937			121.5	291.165			293.383	3.4608			121.5	296.081			293.752	3.50778			121.5	295.963			293.84	3.42073			121.5	295.858			293.382	3.14765			121.5	293.916			293.457	3.72366
		122	294.817			293.469	3.37323			122	296.611			293.404	3.46009			122	290.398			293.723	3.51627			122	293.458			293.82	3.41962			122	292.545			293.332	3.19139			122	297.034			293.45	3.73298
		122.5	286.402			293.474	3.37599			122.5	286.74			293.386	3.45273			122.5	300.039			293.707	3.51298			122.5	288.164			293.833	3.42282			122.5	293.291			293.366	3.25335			122.5	295.229			293.451	3.73411
		123	296.837			293.525	3.3456			123	294.972			293.42	3.4205			123	288.311			293.735	3.50946			123	299.741			293.835	3.41983			123	295.373			293.369	3.25283			123	293.976			293.427	3.74675
		123.5	290.195			293.47	3.3799			123.5	298.196			293.425	3.4233			123.5	297.093			293.692	3.48465			123.5	293.285			293.805	3.39412			123.5	287.544			293.358	3.25717			123.5	296.106			293.406	3.73823
		124	294.852			293.475	3.37593			124	291.119			293.39	3.41024			124	295.807			293.728	3.46592			124	287.899			293.794	3.39906			124	296.966			293.32	3.27721			124	287.331			293.417	3.74681
		124.5	289.758			293.443	3.39361			124.5	300.976			293.426	3.42449			124.5	295.21			293.697	3.46323			124.5	296.453			293.809	3.37964			124.5	288.334			293.341	3.25373			124.5	295.833			293.386	3.76781
		125	292.659			293.475	3.38943			125	289.412			293.382	3.38346			125	297.323			293.675	3.46437			125	294.18			293.783	3.3792			125	290.182			293.339	3.25188			125	292.948			293.357	3.76929
		125.5	292.161			293.483	3.38932			125.5	293.346			293.39	3.37636			125.5	296.737			293.663	3.46318			125.5	298.628			293.787	3.38028			125.5	296.167			293.354	3.23594			125.5	294.697			293.41	3.75888
		126	291.531			293.47	3.39921			126	296.617			293.42	3.40297			126	291.561			293.652	3.45491			126	297.625			293.747	3.37081			126	292.43			293.377	3.22971			126	295.617			293.369	3.77751
		126.5	291.65			293.486	3.39732			126.5	287.39			293.381	3.41113			126.5	299.204			293.62	3.45586			126.5	289.818			293.728	3.35959			126.5	294.335			293.372	3.22631			126.5	290.861			293.419	3.83787
		127	293.134			293.5	3.39567			127	297.092			293.415	3.38518			127	294.126			293.605	3.47026			127	302.741			293.753	3.34921			127	293.648			293.37	3.22692			127	296.924			293.395	3.84512
		127.5	290.486			293.462	3.44186			127.5	291.23			293.42	3.39125			127.5	293.852			293.571	3.4487			127.5	289.534			293.696	3.29316			127.5	292.358			293.38	3.2333			127.5	291.628			293.368	3.84827
		128	292.436			293.485	3.43707			128	293.595			293.415	3.39555			128	294.362			293.551	3.45672			128	301.818			293.707	3.28264			128	296.099			293.386	3.2346			128	296.693			293.399	3.85299
		128.5	293.092			293.479	3.43989			128.5	294.196			293.404	3.39865			128.5	293.485			293.535	3.4635			128.5	292.159			293.668	3.23195			128.5	288.021			293.384	3.23535			128.5	286.631			293.355	3.86258
		129	293.428			293.495	3.44566			129	292.679			293.419	3.40955			129	294.799			293.539	3.46525			129	292.423			293.674	3.23024			129	293.55			293.366	3.23002			129	295.382			293.373	3.86268
		129.5	294.337			293.494	3.44573			129.5	292.895			293.419	3.40962			129.5	297.351			293.551	3.46883			129.5	294.915			293.682	3.22908			129.5	298.404			293.374	3.21921			129.5	291.736			293.365	3.85774
		130	292.434			293.461	3.46897			130	297.765			293.426	3.41007			130	287.616			293.553	3.47009			130	287.476			293.674	3.22796			130	286.386			293.368	3.22016			130	286.957			293.35	3.89133
		130.5	288.424			293.47	3.46869			130.5	287.68			293.4	3.39666			130.5	297.071			293.541	3.46088			130.5	291.226			293.7	3.19855			130.5	294.932			293.341	3.20037			130.5	299.711			293.346	3.88967
		131	295.252			293.483	3.45449			131	298.101			293.443	3.37785			131	293.666			293.551	3.44669			131	298.239			293.7	3.19856			131	294.751			293.379	3.16256			131	287.867			293.35	3.88833
		131.5	297.242			293.478	3.45262			131.5	291.942			293.419	3.36167			131.5	289.951			293.512	3.45084			131.5	290.195			293.663	3.18943			131.5	292.45			293.375	3.161			131.5	299.143			293.357	3.8785
		132	298.562			293.496	3.48203			132	295.235			293.434	3.36143			132	299.267			293.52	3.45281			132	298.131			293.679	3.17996			132	294.97			293.358	3.16261			132	291.13			293.324	3.85228
		132.5	287.09			293.466	3.46404			132.5	292.616			293.42	3.3597			132.5	285.979			293.545	3.44504			132.5	296.968			293.648	3.1669			132.5	287.938			293.37	3.16379			132.5	290.726			293.357	3.83361
		133	291.448			293.504	3.43552			133	291.34			293.434	3.36224			133	300.569			293.515	3.42113			133	294.038			293.635	3.15855			133	298.401			293.351	3.16598			133	298.389			293.337	3.81353
		133.5	294.706			293.497	3.44139			133.5	301.219			293.459	3.36569			133.5	288.56			293.553	3.37918			133.5	295.647			293.619	3.16447			133.5	291.194			293.395	3.15209			133.5	288.357			293.332	3.81677
		134	288.912			293.49	3.44035			134	293.546			293.405	3.32737			134	296.631			293.535	3.35134			134	289.066			293.606	3.16156			134	293.082			293.391	3.14673			134	294.107			293.328	3.82059
		134.5	293.024			293.507	3.42613			134.5	290.953			293.411	3.32877			134.5	297.381			293.545	3.33972			134.5	294.291			293.627	3.14517			134.5	295.993			293.378	3.16131			134.5	294.316			293.312	3.80605
		135	296.113			293.521	3.43018			135	295.969			293.414	3.32699			135	290.996			293.519	3.33601			135	295.51			293.615	3.14727			135	288.405			293.403	3.17806			135	292.083			293.34	3.79014
		135.5	289.919			293.492	3.43328			135.5	291.911			293.406	3.32268			135.5	295.298			293.51	3.32817			135.5	290.658			293.61	3.14504			135.5	299.799			293.387	3.17303			135.5	298.959			293.344	3.79158
		136	295.229			293.502	3.42577			136	294.051			293.413	3.32101			136	293.803			293.524	3.32345			136	300.284			293.596	3.16533			136	292.916			293.41	3.1534			136	291.489			293.338	3.79104
		136.5	292.84			293.512	3.43354			136.5	292.217			293.411	3.32079			136.5	287.101			293.537	3.33513			136.5	289.408			293.572	3.13237			136.5	293.952			293.413	3.15952			136.5	298.21			293.331	3.79415
		137	290.683			293.478	3.47374			137	291.55			293.419	3.31984			137	295.762			293.547	3.33939			137	296.051			293.579	3.12416			137	294.246			293.41	3.16045			137	298.072			293.287	3.78051
		137.5	299.392			293.506	3.47407			137.5	295.89			293.397	3.34683			137.5	285.266			293.576	3.30831			137.5	296.704			293.589	3.13479			137.5	288.038			293.432	3.17997			137.5	296.772			293.275	3.78997
		138	293.184			293.467	3.45133			138	287.386			293.405	3.35489			138	297.194			293.56	3.30568			138	291.876			293.581	3.12876			138	296.344			293.429	3.17955			138	294.029			293.251	3.7738
		138.5	294.344			293.483	3.45712			138.5	292.242			293.461	3.34768			138.5	294.989			293.598	3.25337			138.5	293.988			293.587	3.1265			138.5	292.887			293.456	3.1565			138.5	293.086			293.234	3.75994
		139	296.93			293.482	3.45684			139	289.668			293.477	3.34965			139	292.156			293.566	3.24915			139	289.257			293.616	3.15542			139	294.731			293.458	3.1589			139	289.095			293.222	3.75233
		139.5	292.097			293.469	3.44883			139.5	288.767			293.495	3.33879			139.5	299.237			293.569	3.25077			139.5	293.028			293.622	3.14746			139.5	294.671			293.467	3.15966			139.5	299.663			293.209	3.75387
		140	296.575			293.473	3.44769			140	297.061			293.531	3.32662			140	290.055			293.565	3.25299			140	297.299			293.665	3.19628			140	293.704			293.468	3.15999			140	289.916			293.207	3.75413
		140.5	288.155			293.456	3.44078			140.5	292.35			293.502	3.32138			140.5	295.542			293.531	3.22902			140.5	290.82			293.647	3.1859			140.5	294.231			293.447	3.1662			140.5	295.337			293.208	3.7528
		141	291.914			293.503	3.43269			141	295.437			293.506	3.32045			141	295.169			293.574	3.24054			141	299.891			293.651	3.18283			141	293.67			293.423	3.18204			141	296.031			293.206	3.74847
		141.5	297.426			293.493	3.43974			141.5	291.3			293.515	3.32805			141.5	287.72			293.549	3.24549			141.5	299.222			293.64	3.16424			141.5	295.748			293.431	3.18601			141.5	281.139			293.238	3.74829
		142	290.285			293.49	3.43595			142	291.257			293.537	3.32782			142	292.388			293.551	3.24714			142	286.217			293.584	3.16484			142	294.196			293.441	3.19041			142	301.162			293.2	3.76548
		142.5	296.742			293.504	3.4285			142.5	302.214			293.55	3.32395			142.5	291.836			293.567	3.22602			142.5	297.545			293.634	3.1273			142.5	293.286			293.44	3.18947			142.5	288.426			293.196	3.76295
		143	295.028			293.483	3.42164			143	285.126			293.502	3.26728			143	288.304			293.567	3.22606			143	288.479			293.627	3.12005			143	295.496			293.444	3.1911			143	290.88			293.232	3.68113
		143.5	287.487			293.504	3.44474			143.5	302.621			293.566	3.22746			143.5	300.741			293.588	3.22802			143.5	298.967			293.653	3.09864			143.5	295.214			293.439	3.19222			143.5	300.192			293.204	3.64139
		144	299.026			293.548	3.42387			144	293.096			293.514	3.16428			144	292.735			293.615	3.20626			144	292.251			293.642	3.08355			144	299.626			293.394	3.22728			144	283.11			293.238	3.62849
		144.5	288.491			293.504	3.40954			144.5	292.29			293.516	3.16414			144.5	293.979			293.577	3.16642			144.5	290.022			293.648	3.082			144.5	288.938			293.399	3.23071			144.5	300.551			293.23	3.63527
		145	295.079			293.524	3.39188			145	299.523			293.541	3.17407			145	298.551			293.574	3.16741			145	297.736			293.666	3.07127			145	297.169			293.359	3.20251			145	298.97			293.2	3.60239
		145.5	296.399			293.523	3.39164			145.5	293.009			293.538	3.16914			145.5	293.028			293.571	3.16739			145.5	292.954			293.641	3.05855			145.5	290.264			293.383	3.18717			145.5	288.077			293.252	3.53071
		146	291.76			293.522	3.39032			146	291.855			293.541	3.16892			146	294.82			293.559	3.15327			146	287.252			293.621	3.07608			146	292.759			293.366	3.1761			146	297.294			293.247	3.52127
		146.5	298.836			293.528	3.38831			146.5	294.575			293.539	3.17055			146.5	290.91			293.549	3.15824			146.5	298.232			293.652	3.04279			146.5	287.334			293.395	3.17431			146.5	288.056			293.21	3.50006
		147	290.005			293.496	3.36809			147	288.788			293.534	3.16973			147	288.218			293.56	3.16703			147	292.904			293.632	3.02567			147	294.661			293.402	3.17429			147	290.562			293.234	3.48119
		147.5	291.123			293.49	3.3755			147.5	293.712			293.569	3.15589			147.5	298.417			293.561	3.16663			147.5	292.893			293.622	3.03109			147.5	292.808			293.449	3.15451			147.5	294.922			293.221	3.47087
		148	300.184			293.532	3.39873			148	295.237			293.576	3.1576			148	285.722			293.58	3.14576			148	296.527			293.635	3.03338			148	295.229			293.446	3.15351			148	290.017			293.247	3.45153
		148.5	292.377			293.488	3.36967			148.5	289.614			293.571	3.15572			148.5	298.274			293.566	3.1306			148.5	293.836			293.612	3.02878			148.5	295.733			293.45	3.15328			148.5	295.851			293.254	3.44748
		149	298.865			293.496	3.36895			149	296.117			293.612	3.15718			149	293.472			293.571	3.11804			149	292.957			293.608	3.02912			149	295.404			293.425	3.15974			149	293.84			293.265	3.45596
		149.5	287.726			293.482	3.35257			149.5	290.316			293.591	3.15436			149.5	285.126			293.547	3.10024			149.5	292.463			293.622	3.03268			149.5	294.296			293.388	3.17544			149.5	295.958			293.264	3.45681
		150	292.131			293.479	3.35723			150	293.204			293.597	3.14916			150	298.414			293.531	3.10876			150	291.557			293.624	3.03204			150	295.037			293.36	3.18243			150	290.824			293.275	3.46806
		150.5	293.289			293.506	3.36715			150.5	293.214			293.584	3.15628			150.5	291.611			293.555	3.0616			150.5	299.865			293.64	3.02981			150.5	290.457			293.346	3.1848			150.5	290.442			293.287	3.47411
		151	288.178			293.526	3.37787			151	293.92			293.577	3.15883			151	295.459			293.562	3.07359			151	288.9			293.599	3.0013			151	296.925			293.343	3.18346			151	294.878			293.263	3.47187
		151.5	293.473			293.509	3.41223			151.5	292.142			293.592	3.16837			151.5	292.4			293.539	3.10357			151.5	297.296			293.588	3.02212			151.5	293.664			293.35	3.17838			151.5	289.158			293.289	3.47275
		152	296.821			293.536	3.43298			152	290.906			293.583	3.17572			152	295.076			293.556	3.1234			152	291.743			293.573	3.01106			152	296.843			293.321	3.17229			152	290.186			293.268	3.5019
		152.5	288.229			293.511	3.42694			152.5	286.774			293.6	3.17053			152.5	299.201			293.551	3.12668			152.5	295.198			293.604	3.02451			152.5	292.127			293.336	3.18145			152.5	296.752			293.277	3.50772
		153	298.35			293.557	3.41773			153	301.391			293.64	3.13445			153	291.963			293.544	3.12487			153	291.977			293.596	3.0224			153	292.418			293.308	3.1757			153	291.16			293.274	3.51106
		153.5	290.096			293.553	3.41221			153.5	286.809			293.606	3.08659			153.5	293.427			293.538	3.11517			153.5	292.057			293.632	3.04537			153.5	294.251			293.312	3.17464			153.5	295.141			293.278	3.50804
		154	291.648			293.552	3.41392			154	295.565			293.644	3.0493			154	296.652			293.519	3.13714			154	290.047			293.602	3.09007			154	296.971			293.311	3.17498			154	292.003			293.275	3.50497
		154.5	295.704			293.613	3.48933			154.5	295.309			293.653	3.05819			154.5	295.234			293.533	3.14294			154.5	293.4			293.61	3.0833			154.5	292.356			293.289	3.18376			154.5	294.933			293.259	3.52136
		155	289.316			293.576	3.50553			155	294.53			293.651	3.05708			155	296.879			293.511	3.13629			155	289.329			293.614	3.08362			155	296.295			293.279	3.17497			155	292.755			293.262	3.52364
		155.5	295.721			293.617	3.50353			155.5	290.082			293.669	3.07397			155.5	295.745			293.512	3.13657			155.5	293.363			293.592	3.12908			155.5	292.796			293.311	3.19804			155.5	287.575			293.276	3.52413
		156	288.646			293.623	3.50825			156	299.427			293.677	3.0671			156	296.469			293.485	3.1305			156	298.269			293.599	3.13022			156	288.612			293.321	3.21174			156	298.572			293.266	3.52227
		156.5	291.414			293.624	3.50748			156.5	294.254			293.648	3.03989			156.5	295.939			293.461	3.1319			156.5	292.82			293.558	3.12331			156.5	297.744			293.319	3.21245			156.5	290.231			293.273	3.52256
		157	295.904			293.67	3.53839			157	295.264			293.643	3.03976			157	296.518			293.453	3.12622			157	294.956			293.531	3.15281			157	292.541			293.356	3.20094			157	292.512			293.279	3.51371
		157.5	288.196			293.635	3.55054			157.5	296.493			293.612	3.05499			157.5	297.856			293.456	3.12868			157.5	294.701			293.533	3.15411			157.5	289.198			293.301	3.21894			157.5	296.606			293.247	3.49439
		158	290.843			293.648	3.53503			158	292.545			293.597	3.04817			158	289.771			293.436	3.12165			158	295.602			293.517	3.1566			158	295.983			293.302	3.21882			158	286.835			293.26	3.48795
		158.5	293.242			293.696	3.56152			158.5	295.851			293.579	3.0651			158.5	293.764			293.403	3.11019			158.5	292.446			293.514	3.15513			158.5	294.335			293.319	3.20609			158.5	299.957			293.239	3.5051
		159	289.82			293.667	3.5894			159	292.627			293.544	3.07877			159	297.981			293.418	3.09982			159	294.314			293.532	3.15901			159	298.621			293.297	3.20283			159	287.698			293.202	3.50917
		159.5	296.785			293.702	3.58605			159.5	289.73			293.569	3.09137			159.5	293.68			293.403	3.1052			159.5	293.627			293.526	3.15866			159.5	290.322			293.324	3.23431			159.5	294.947			293.228	3.48094
		160	293.559			293.699	3.5836			160	293.416			293.58	3.08154			160	298.206			293.386	3.08945			160	296.676			293.519	3.15993			160	290.939			293.311	3.21819			160	294.047			293.204	3.45075
		160.5	290.767			293.685	3.58947			160.5	290.159			293.558	3.09879			160.5	292.77			293.379	3.09066			160.5	299.709			293.495	3.1542			160.5	296.491			293.307	3.2226			160.5	290.153			293.243	3.43218
		161	297.603			293.718	3.5935			161	294.017			293.588	3.09532			161	293.538			293.328	3.09506			161	298.209			293.464	3.12329			161	282.899			293.322	3.21862			161	295.982			293.239	3.43082
		161.5	289.547			293.718	3.59273			161.5	295.859			293.567	3.10709			161.5	301.847			293.332	3.0949			161.5	288.16			293.446	3.10635			161.5	298.063			293.281	3.23122			161.5	294.574			293.238	3.43064
		162	300.157			293.732	3.58168			162	287.656			293.572	3.11157			162	292.402			293.354	3.11215			162	297.599			293.474	3.08372			162	287.761			293.364	3.17803			162	293.203			293.263	3.42626
		162.5	292.308			293.689	3.55568			162.5	301.357			293.62	3.09503			162.5	297.054			293.311	3.0534			162.5	293.371			293.45	3.07029			162.5	294.153			293.341	3.16054			162.5	299.329			293.248	3.42097
		163	295.133			293.673	3.57018			163	293.914			293.592	3.04968			163	292.695			293.335	3.06577			163	289.216			293.462	3.07494			163	296.906			293.358	3.13999			163	294.148			293.251	3.42295
		163.5	295.583			293.685	3.57928			163.5	286.012			293.592	3.04971			163.5	292.43			293.318	3.05446			163.5	297.9			293.46	3.07841			163.5	292.794			293.359	3.14028			163.5	292.073			293.241	3.42633
		164	289.724			293.702	3.59643			164	298.622			293.635	3.00273			164	296.249			293.3	3.06853			164	294.035			293.444	3.0637			164	293.613			293.319	3.14563			164	297.856			293.193	3.40842
		164.5	292.585			293.747	3.60262			164.5	285.582			293.598	2.98655			164.5	290.319			293.311	3.06963			164.5	294.032			293.437	3.06384			164.5	290.17			293.303	3.15625			164.5	292.426			293.212	3.42551
		165	296.78			293.74	3.60582			165	299.915			293.639	2.93199			165	294.175			293.291	3.06371			165	296.56			293.438	3.06398			165	289.989			293.332	3.1846			165	293.726			293.214	3.42502
		165.5	294.442			293.732	3.60072			165.5	291.682			293.611	2.89864			165.5	293.967			293.317	3.06093			165.5	296.497			293.416	3.05746			165.5	295.309			293.346	3.17679			165.5	292.482			293.187	3.40963
		166	288.607			293.74	3.60386			166	292.764			293.611	2.89869			166	294.248			293.308	3.06131			166	295.58			293.391	3.05265			166	290.817			293.351	3.17181			166	288.364			293.191	3.4092
		166.5	294.884			293.762	3.5858			166.5	294.469			293.617	2.89819			166.5	295.829			293.308	3.06133			166.5	296.371			293.359	3.06282			166.5	293.759			293.346	3.16936			166.5	295.063			293.154	3.44287
		167	289.899			293.748	3.58684			167	293.025			293.593	2.91213			167	293.499			293.295	3.06273			167	293.784			293.339	3.05616			167	291.929			293.345	3.16994			167	292.94			293.165	3.44419
		167.5	291.253			293.775	3.57841			167.5	297.215			293.6	2.91263			167.5	293.804			293.306	3.0756			167.5	293.312			293.308	3.08267			167.5	294.849			293.379	3.2098			167.5	293.079			293.191	3.42747
		168	291.898			293.794	3.57513			168	296.518			293.58	2.90157			168	291.137			293.281	3.09399			168	294.931			293.301	3.08431			168	297.187			293.362	3.22644			168	296.193			293.169	3.4297
		168.5	295.333			293.821	3.58027			168.5	297.281			293.582	2.90369			168.5	293.421			293.28	3.09381			168.5	294.988			293.259	3.12085			168.5	290.333			293.351	3.22505			168.5	292.159			293.187	3.43753
		169	295.875			293.812	3.57871			169	293.176			293.569	2.89305			169	293.09			293.282	3.09228			169	293.778			293.238	3.12339			169	290.823			293.353	3.22787			169	298.524			293.173	3.44375
		169.5	292.291			293.769	3.60539			169.5	290.761			293.553	2.90455			169.5	291.212			293.263	3.10364			169.5	297.681			293.213	3.13791			169.5	294.033			293.335	3.2545			169.5	285.909			293.149	3.43901
		170	293.933			293.802	3.62211			170	293.527			293.58	2.9044			170	300.528			293.276	3.10854			170	302.249			293.19	3.1219			170	289.176			293.355	3.25123			170	299.94			293.184	3.46456
		170.5	295.053			293.772	3.64618			170.5	297.445			293.579	2.90448			170.5	293.537			293.285	3.10517			170.5	293.037			293.17	3.0754			170.5	299.497			293.359	3.25248			170.5	291.371			293.155	3.44402
		171	292.115			293.76	3.64572			171	296.964			293.542	2.90224			171	296.093			293.206	3.12118			171	299.101			293.185	3.08208			171	294.93			293.385	3.23966			171	293.056			293.185	3.40654
		171.5	295.18			293.797	3.66536			171.5	290.81			293.543	2.90294			171.5	294.001			293.221	3.12986			171.5	292.189			293.145	3.05699			171.5	290.639			293.353	3.21059			171.5	293.579			293.152	3.37273
		172	296.248			293.748	3.71067			172	294.584			293.556	2.89647			172	295.678			293.185	3.13796			172	292.774			293.136	3.06246			172	294.68			293.344	3.20868			172	293.435			293.124	3.41108
		172.5	289.213			293.743	3.70799			172.5	291.448			293.566	2.90305			172.5	294.637			293.186	3.13815			172.5	295.765			293.119	3.07378			172.5	289.955			293.356	3.20305			172.5	297.004			293.162	3.45359
		173	295.353			293.777	3.6974			173	291.572			293.575	2.89928			173	290.357			293.177	3.13367			173	286.821			293.11	3.06878			173	290.997			293.352	3.20182			173	294.949			293.139	3.46646
		173.5	295.733			293.733	3.7307			173.5	296.181			293.558	2.91945			173.5	295.379			293.174	3.13267			173.5	293.949			293.142	3.03622			173.5	295.657			293.351	3.20221			173.5	291.121			293.128	3.46919
		174	297.281			293.75	3.74719			174	292.378			293.545	2.91354			174	291.527			293.216	3.15128			174	293.42			293.165	3.06059			174	289.564			293.356	3.19943			174	295.441			293.119	3.46169
		174.5	296.783			293.724	3.74061			174.5	296.348			293.542	2.91527			174.5	292.161			293.188	3.15752			174.5	291.943			293.178	3.06682			174.5	292.163			293.355	3.19904			174.5	288.049			293.091	3.47023
		175	288.599			293.708	3.73433			175	293.533			293.556	2.9362			175	296.32			293.205	3.15772			175	292.866			293.19	3.06657			175	290.998			293.355	3.19971			175	295.299			293.118	3.47622
		175.5	289.566			293.756	3.73033			175.5	289.633			293.537	2.94857			175.5	294.788			293.207	3.15723			175.5	294.41			293.175	3.07547			175.5	287.92			293.343	3.2083			175.5	299.303			293.12	3.47759
		176	293.701			293.766	3.72173			176	292.617			293.567	2.93952			176	296.008			293.161	3.17831			176	294.843			293.183	3.0815			176	295.967			293.366	3.20806			176	285.477			293.145	3.45897
		176.5	290.824			293.772	3.72243			176.5	292.437			293.608	2.98227			176.5	296.01			293.174	3.1903			176.5	296.677			293.193	3.08905			176.5	293.88			293.388	3.18569			176.5	295.684			293.148	3.46133
		177	300.942			293.779	3.71784			177	293.956			293.59	2.99934			177	287.048			293.148	3.18822			177	294.385			293.161	3.08565			177	292.841			293.393	3.1907			177	293.368			293.105	3.43827
		177.5	294.263			293.726	3.69114			177.5	289.034			293.614	3.02129			177.5	302.783			293.139	3.18262			177.5	296.946			293.193	3.13205			177.5	289.911			293.391	3.19051			177.5	294.895			293.162	3.4062
		178	289.647			293.727	3.69131			178	291.581			293.627	3.00733			178	289.355			293.178	3.15561			178	289.073			293.166	3.12303			178	288.095			293.393	3.19028			178	300.954			293.16	3.40465
		178.5	296.756			293.726	3.69329			178.5	304.417			293.612	3.02519			178.5	293.36			293.144	3.0877			178.5	295.285			293.194	3.11136			178.5	302.687			293.394	3.18936			178.5	289.926			293.153	3.40569
		179	291.309			293.703	3.68872			179	291.211			293.583	2.94838			179	299.891			293.168	3.0766			179	286.71			293.186	3.108			179	293.365			293.439	3.17816			179	290.913			293.16	3.41152
		179.5	295.102			293.724	3.68705			179.5	288.867			293.598	2.94398			179.5	291.039			293.185	3.08778			179.5	293.66			293.212	3.07518			179.5	293.416			293.378	3.11692			179.5	294.321			293.116	3.36733
		180	295.314			293.7	3.69352			180	298.532			293.608	2.93149			180	296.193			293.141	3.05448			180	293.021			293.221	3.07905			180	296.526			293.373	3.11782			180	293.738			293.145	3.36439
		180.5	293.772			293.713	3.70343			180.5	288.711			293.579	2.91128			180.5	287.846			293.168	3.05887			180.5	292.252			293.216	3.08023			180.5	295.902			293.363	3.1209			180.5	296.211			293.162	3.36179
		181	295.532			293.687	3.72037			181	293.305			293.623	2.90397			181	292.518			293.171	3.06261			181	291.413			293.212	3.08212			181	295.97			293.335	3.11728			181	295.678			293.152	3.36124
		181.5	295.808			293.649	3.74004			181.5	292.197			293.63	2.90486			181.5	298.17			293.183	3.04616			181.5	292.44			293.235	3.08648			181.5	294.433			293.329	3.11321			181.5	291.154			293.178	3.38649
		182	291.979			293.664	3.75357			182	289.956			293.632	2.9041			182	293.978			293.187	3.0458			182	291.446			293.208	3.11793			182	288.858			293.295	3.12128			182	295.709			293.155	3.3816
		182.5	295.763			293.667	3.75232			182.5	292.877			293.674	2.9127			182.5	291.756			293.192	3.05598			182.5	297.893			293.236	3.12761			182.5	294.758			293.306	3.12973			182.5	292.831			293.159	3.38488
		183	293.029			293.675	3.75816			183	292.296			293.68	2.91227			183	293.906			293.178	3.0593			183	293.71			293.195	3.12013			183	289.509			293.334	3.11462			183	288.513			293.155	3.38785
		183.5	297.012			293.693	3.76359			183.5	293.238			293.683	2.91123			183.5	293.292			293.165	3.0698			183.5	289.738			293.174	3.13119			183.5	295.751			293.303	3.13012			183.5	295.762			293.141	3.38303
		184	298.528			293.651	3.77261			184	295.161			293.698	2.91699			184	295.944			293.152	3.07248			184	293.129			293.225	3.15786			184	289.363			293.339	3.12741			184	292.975			293.17	3.40466
		184.5	294.019			293.639	3.76095			184.5	289.66			293.674	2.92496			184.5	290.47			293.155	3.07295			184.5	291.837			293.192	3.19337			184.5	295.967			293.317	3.12565			184.5	298.712			293.187	3.3899
		185	294.641			293.66	3.7739			185	295.751			293.697	2.91147			185	294.205			293.146	3.06731			185	292.242			293.207	3.19425			185	288.466			293.332	3.11387			185	296.205			293.19	3.3929
		185.5	297.309			293.63	3.7896			185.5	290.123			293.696	2.91092			185.5	295.477			293.153	3.06285			185.5	286.87			293.235	3.21016			185.5	295.781			293.347	3.13322			185.5	289.917			293.166	3.41132
		186	297.138			293.615	3.78096			186	291.788			293.713	2.89992			186	288.581			293.143	3.06268			186	291.383			293.247	3.19051			186	292.505			293.35	3.12891			186	293.459			293.127	3.39251
		186.5	297.088			293.594	3.77307			186.5	295.205			293.722	2.89675			186.5	296.905			293.119	3.06303			186.5	295.449			293.283	3.21044			186.5	296.866			293.352	3.13074			186.5	292.454			293.119	3.38699
		187	295.293			293.584	3.76647			187	290.489			293.712	2.89502			187	290.905			293.165	3.06482			187	289.019			293.243	3.23428			187	293.958			293.353	3.13045			187	295.18			293.13	3.37993
		187.5	294.131			293.607	3.79196			187.5	294.002			293.72	2.88822			187.5	293.102			293.141	3.05464			187.5	295.923			293.272	3.22221			187.5	289.797			293.328	3.12253			187.5	290.783			293.127	3.37998
		188	299.931			293.589	3.79854			188	293.274			293.725	2.88973			188	293.066			293.166	3.05756			188	292.527			293.298	3.26468			188	294.23			293.329	3.12288			188	294.433			293.142	3.38404
		188.5	293.759			293.58	3.78524			188.5	293.317			293.714	2.89591			188.5	292.576			293.201	3.09617			188.5	292.565			293.285	3.27276			188.5	289.273			293.335	3.11741			188.5	294.864			293.132	3.38096
		189	298.859			293.581	3.78538			189	297.017			293.733	2.90514			189	295.936			293.197	3.09692			189	297.181			293.317	3.298			189	291.005			293.362	3.14872			189	292.982			293.154	3.38013
		189.5	294.225			293.544	3.77023			189.5	290.478			293.725	2.89846			189.5	292.208			293.224	3.11521			189.5	294.359			293.295	3.28688			189.5	295.342			293.364	3.14564			189.5	295.77			293.13	3.38794
		190	292.805			293.548	3.77155			190	296.538			293.742	2.88932			190	287.969			293.223	3.1144			190	294.029			293.269	3.29915			190	293.77			293.382	3.1423			190	297.159			293.139	3.39513
		190.5	301.007			293.548	3.77163			190.5	295.408			293.734	2.8839			190.5	287.266			293.209	3.12462			190.5	296.461			293.286	3.31173			190.5	296.022			293.364	3.14148			190.5	292.985			293.132	3.39695
		191	284.267			293.505	3.73514			191	291.921			293.704	2.89811			191	291.656			293.236	3.10246			191	290.362			293.24	3.331			191	291.659			293.376	3.1479			191	291.734			293.148	3.4158
		191.5	296.108			293.567	3.68444			191.5	292.954			293.715	2.89552			191.5	296.834			293.279	3.07917			191.5	297.912			293.285	3.35228			191.5	294.468			293.367	3.14278			191.5	296.533			293.138	3.40707
		192	296.046			293.534	3.69115			192	294.536			293.743	2.9147			192	287.824			293.279	3.07925			192	288.508			293.254	3.33774			192	293.72			293.367	3.14241			192	290.992			293.146	3.40875
		192.5	290.981			293.536	3.69238			192.5	293.585			293.719	2.92782			192.5	295.36			293.262	3.06894			192.5	293.655			293.284	3.3217			192.5	290.161			293.354	3.14323			192.5	295.611			293.167	3.41269
		193	295.437			293.558	3.6901			193	290.314			293.743	2.94649			193	290.548			293.268	3.0592			193	295.239			293.291	3.32393			193	292.87			293.391	3.19053			193	289.829			293.106	3.45983
		193.5	289.456			293.54	3.68974			193.5	290.672			293.759	2.93645			193.5	296.987			293.262	3.05612			193.5	288.441			293.27	3.32474			193.5	295.459			293.386	3.19626			193.5	291.886			293.115	3.45669
		194	292.208			293.57	3.6808			194	297.408			293.771	2.92872			194	290.259			293.293	3.06049			194	293.027			293.31	3.31493			194	288.199			293.383	3.19715			194	292.678			293.113	3.45517
		194.5	292.836			293.562	3.6853			194.5	289.408			293.743	2.92065			194.5	290.082			293.246	3.07532			194.5	289.562			293.283	3.34041			194.5	296.391			293.363	3.19649			194.5	289.121			293.117	3.45142
		195	291.802			293.562	3.68521			195	297.427			293.774	2.90725			195	296.92			293.283	3.08373			195	293.227			293.296	3.33082			195	295.706			293.402	3.18055			195	298.402			293.142	3.46079
		195.5	296.066			293.575	3.68347			195.5	289.317			293.728	2.92194			195.5	295.883			293.276	3.09314			195.5	290.163			293.305	3.33334			195.5	288.916			293.372	3.18094			195.5	291.764			293.126	3.47097
		196	295.491			293.55	3.68331			196	292.63			293.756	2.90637			196	291.317			293.287	3.11007			196	289.915			293.306	3.3331			196	292.579			293.354	3.17783			196	294.417			293.143	3.45959
		196.5	295.643			293.549	3.68258			196.5	301.121			293.744	2.91569			196.5	297.925			293.27	3.10517			196.5	293.926			293.32	3.32458			196.5	296.643			293.392	3.17079			196.5	296.259			293.116	3.43945
		197	296.994			293.534	3.68019			197	294.511			293.697	2.87245			197	289.919			293.271	3.10458			197	290.676			293.312	3.32516			197	288.418			293.394	3.1705			197	291.996			293.101	3.45188
		197.5	294.857			293.52	3.67237			197.5	289.634			293.686	2.87334			197.5	292.093			293.268	3.10056			197.5	293.898			293.317	3.32183			197.5	293.918			293.382	3.16276			197.5	293.786			293.099	3.45125
		198	291.5			293.504	3.67327			198	299.661			293.693	2.8653			198	297.971			293.292	3.09326			198	295.897			293.306	3.32385			198	290.295			293.424	3.15301			198	294.237			293.085	3.44402
		198.5	293.544			293.5	3.67592			198.5	287.989			293.645	2.84541			198.5	291.403			293.31	3.09702			198.5	297.755			293.295	3.31899			198.5	292.409			293.406	3.16052			198.5	292.031			293.058	3.47306
		199	290.498			293.501	3.67595			199	296.423			293.684	2.82069			199	297.299			293.277	3.08256			199	291.367			293.278	3.30465			199	292.533			293.408	3.15892			199	296.565			293.067	3.47696
		199.5	292.491			293.514	3.66985			199.5	292.757			293.674	2.8145			199.5	291.994			293.291	3.08027			199.5	298.498			293.281	3.30308			199.5	299.41			293.429	3.16619			199.5	296.079			293.042	3.48583
		200	288.606			293.501	3.67813			200	295.43			293.668	2.81747			200	291.41			293.275	3.06765			200	293.429			293.262	3.28379			200	289.677			293.404	3.19298			200	286.602			293.049	3.48522
		200.5	295.265			293.502	3.67783			200.5	294.783			293.665	2.816			200.5	297.412			293.276	3.06716			200.5	291.271			293.259	3.28389			200.5	301.244			293.393	3.17594			200.5	296.439			293.035	3.4766
		201	291.345			293.495	3.67584			201	292.846			293.671	2.81972			201	288.851			293.286	3.06432			201	295.568			293.271	3.28097			201	291.379			293.389	3.18183			201	288.714			293.002	3.47904
		201.5	292.136			293.526	3.68359			201.5	292.879			293.682	2.82076			201.5	292.58			293.264	3.05037			201.5	294.887			293.276	3.2854			201.5	290.889			293.343	3.13381			201.5	292.39			293.05	3.45716
		202	298.65			293.512	3.69351			202	293.679			293.675	2.82452			202	294.273			293.283	3.03458			202	301.385			293.268	3.28342			202	295.899			293.362	3.13342			202	289.618			293.017	3.45651
		202.5	290.718			293.511	3.69118			202.5	292.692			293.665	2.82838			202.5	290.059			293.325	3.0825			202.5	294.771			293.22	3.23421			202.5	291.439			293.375	3.12852			202.5	295.679			293.04	3.44307
		203	295.308			293.523	3.68598			203	297.422			293.664	2.82856			203	292.188			293.276	3.14382			203	296.348			293.228	3.2397			203	294.493			293.364	3.12352			203	289.478			293.039	3.44331
		203.5	292.573			293.508	3.68462			203.5	287.394			293.651	2.81715			203.5	291.099			293.287	3.13646			203.5	295.442			293.221	3.23445			203.5	291.786			293.387	3.12562			203.5	296.581			293.054	3.43494
		204	290.166			293.529	3.69073			204	297.388			293.664	2.79398			204	295.467			293.317	3.15539			204	290.201			293.203	3.23202			204	289.362			293.386	3.12543			204	289.138			293.049	3.43196
		204.5	295.148			293.535	3.68577			204.5	295.07			293.649	2.78195			204.5	293.034			293.309	3.16397			204.5	293.779			293.227	3.22759			204.5	298.923			293.399	3.12417			204.5	292.325			293.054	3.42739
		205	290.762			293.52	3.6856			205	293.656			293.641	2.78015			205	290.295			293.332	3.19746			205	289.786			293.202	3.24274			205	290.777			293.431	3.11577			205	294.223			293.066	3.44422
		205.5	300.809			293.534	3.68043			205.5	293.321			293.628	2.78613			205.5	295.05			293.337	3.19776			205.5	287.32			293.233	3.23992			205.5	293.371			293.39	3.09747			205.5	291.132			293.097	3.43703
		206	294.949			293.487	3.64758			206	289.211			293.617	2.79248			206	293.855			293.342	3.19356			206	295.178			293.279	3.22045			206	295.435			293.404	3.09198			206	295.207			293.121	3.44743
		206.5	292.12			293.491	3.64974			206.5	294.22			293.634	2.77584			206.5	287.887			293.332	3.19143			206.5	290.885			293.294	3.23605			206.5	296.061			293.404	3.09198			206.5	295.036			293.115	3.44655
		207	297.99			293.51	3.65296			207	289.079			293.612	2.78822			207	298.389			293.299	3.22032			207	296.539			293.296	3.23447			207	296.612			293.379	3.09661			207	290.908			293.105	3.45541
		207.5	289.568			293.491	3.6393			207.5	294.382			293.626	2.77257			207.5	290.732			293.312	3.20341			207.5	289.969			293.278	3.22641			207.5	296.731			293.358	3.09257			207.5	299.402			293.077	3.46126
		208	294.657			293.519	3.63079			208	296.895			293.609	2.77848			208	296.633			293.287	3.18314			208	291.549			293.31	3.22605			208	289.908			293.338	3.08433			208	293.753			293.102	3.49501
		208.5	297.095			293.494	3.64014			208.5	292.023			293.599	2.77046			208.5	292.863			293.313	3.18365			208.5	300.007			293.312	3.22515			208.5	291.223			293.342	3.08886			208.5	292.49			293.096	3.49978
		209	288.898			293.479	3.63141			209	294.905			293.607	2.76822			209	289.167			293.286	3.17885			209	289.391			293.254	3.20895			209	293.223			293.335	3.0982			209	293.846			293.093	3.49335
		209.5	298.781			293.486	3.62371			209.5	291.834			293.615	2.77501			209.5	297.287			293.285	3.17887			209.5	297.963			293.257	3.20629			209.5	295.986			293.36	3.10123			209.5	284.766			293.109	3.50425
		210	293.979			293.488	3.62612			210	293.84			293.64	2.78133			210	290.424			293.292	3.17145			210	295.524			293.235	3.18901			210	292.579			293.361	3.10123			210	298.935			293.123	3.50728
		210.5	283.702			293.489	3.62634			210.5	294.406			293.638	2.78134			210.5	300.585			293.285	3.16411			210.5	288.789			293.235	3.18899			210.5	290.597			293.349	3.09565			210.5	296.179			293.143	3.52331
		211	293.502			293.557	3.56987			211	290.236			293.635	2.78086			211	294.41			293.278	3.17283			211	296.461			293.258	3.17339			211	295.394			293.372	3.10738			211	287.49			293.17	3.47954
		211.5	292.518			293.568	3.57308			211.5	298.069			293.658	2.77143			211.5	290.663			293.239	3.13034			211.5	294.778			293.258	3.17348			211.5	289.101			293.365	3.11541			211.5	296.412			293.14	3.45553
		212	287.243			293.555	3.58212			212	292.077			293.627	2.75655			212	297.99			293.214	3.14185			212	294.601			293.253	3.1719			212	295.711			293.368	3.11771			212	287.422			293.138	3.45426
		212.5	295.882			293.625	3.59617			212.5	290.709			293.638	2.75471			212.5	293.931			293.224	3.13684			212.5	296.1			293.246	3.17046			212.5	290.697			293.421	3.13591			212.5	299.246			293.146	3.44261
		213	291.111			293.609	3.59312			213	292.838			293.638	2.75484			213	288.09			293.209	3.12094			213	289.687			293.244	3.1685			213	294.604			293.38	3.16029			213	296.363			293.134	3.43533
		213.5	293.341			293.587	3.62337			213.5	288.672			293.628	2.761			213.5	295.686			293.186	3.13252			213.5	297.811			293.264	3.15863			213.5	296.631			293.403	3.15748			213.5	294.601			293.147	3.41851
		214	292.407			293.588	3.62333			214	293.715			293.646	2.74046			214	284.24			293.24	3.13741			214	292.496			293.248	3.14352			214	288.339			293.367	3.1836			214	299.019			293.103	3.39645
		214.5	289.894			293.577	3.6305			214.5	291.185			293.634	2.74521			214.5	296.098			293.234	3.1341			214.5	292.084			293.227	3.16248			214.5	297.031			293.346	3.17599			214.5	288.03			293.096	3.3909
		215	298.513			293.602	3.62242			215	296.435			293.656	2.74352			215	294.375			293.283	3.06916			215	295.791			293.237	3.16204			215	297.129			293.383	3.16035			215	295.035			293.102	3.39452
		215.5	291.58			293.617	3.64943			215.5	295.9			293.632	2.74009			215.5	291.882			293.26	3.0655			215.5	287.716			293.234	3.1598			215.5	291.724			293.346	3.16013			215.5	292.087			293.073	3.36856
		216	291.104			293.596	3.67265			216	289.898			293.63	2.73861			216	297.149			293.25	3.06504			216	296.646			293.239	3.15134			216	296.706			293.336	3.15132			216	290.08			293.097	3.34966
		216.5	294.068			293.62	3.67157			216.5	293.027			293.637	2.73111			216.5	292.693			293.281	3.0818			216.5	291.368			293.227	3.14292			216.5	290.112			293.333	3.15327			216.5	297.202			293.071	3.35495
		217	289.677			293.601	3.67857			217	298.789			293.642	2.73097			217	296.619			293.273	3.07386			217	295.021			293.248	3.14482			217	294.582			293.309	3.1457			217	292.079			293.073	3.35435
		217.5	294.349			293.609	3.67187			217.5	291.127			293.604	2.71238			217.5	293.163			293.301	3.09465			217.5	299.262			293.235	3.1431			217.5	295.894			293.308	3.14752			217.5	289.577			293.093	3.3483
		218	293.755			293.639	3.70284			218	298.634			293.598	2.71943			218	288.824			293.302	3.09495			218	289.971			293.204	3.11395			218	294.396			293.279	3.16233			218	294.682			293.056	3.34367
		218.5	293.403			293.603	3.73652			218.5	291.64			293.566	2.69754			218.5	296.493			293.283	3.10675			218.5	295.962			293.217	3.10569			218.5	294.407			293.285	3.16847			218.5	289.132			293.076	3.34976
		219	296.676			293.617	3.7406			219	289.96			293.583	2.69603			219	292.518			293.287	3.10224			219	294.674			293.214	3.10337			219	289.946			293.277	3.1676			219	299.174			293.089	3.34135
		219.5	292.424			293.609	3.736			219.5	293.912			293.566	2.72943			219.5	295.282			293.26	3.09743			219.5	297.249			293.219	3.10659			219.5	296.621			293.256	3.17453			219.5	296.787			293.078	3.33973
		220	293.671			293.576	3.77542			220	290.623			293.565	2.72935			220	294.411			293.264	3.09699			220	295.601			293.217	3.10356			220	296.261			293.275	3.1661			220	290.302			293.111	3.33387
		220.5	295.725			293.608	3.80347			220.5	294.16			293.594	2.72838			220.5	290.709			293.283	3.12089			220.5	290.937			293.205	3.09896			220.5	293.459			293.248	3.1611			220.5	291.948			293.049	3.33606
		221	291.157			293.602	3.80092			221	293.686			293.587	2.72861			221	293.58			293.268	3.12238			221	297.106			293.202	3.10074			221	292.382			293.226	3.15525			221	287.961			293.013	3.33477
		221.5	300.576			293.627	3.80131			221.5	289.897			293.625	2.78199			221.5	289.811			293.287	3.11818			221.5	294.267			293.169	3.09423			221.5	285.582			293.249	3.17342			221.5	296.382			293.044	3.3379
		222	285.579			293.597	3.76985			222	295.387			293.627	2.77936			222	292.726			293.32	3.15624			222	292.09			293.173	3.09583			222	302.631			293.237	3.18054			222	289.063			293.03	3.34777
		222.5	295.825			293.617	3.73741			222.5	292.986			293.632	2.78336			222.5	296.189			293.336	3.1465			222.5	295.953			293.164	3.10107			222.5	293.304			293.276	3.1339			222.5	292.852			293.064	3.33062
		223	296.585			293.619	3.73838			223	293.686			293.61	2.80637			223	291.412			293.363	3.16553			223	288.536			293.167	3.10382			223	290.985			293.228	3.06296			223	297.431			293.053	3.32323
		223.5	285.928			293.619	3.73912			223.5	295.92			293.611	2.80644			223.5	295.477			293.344	3.1601			223.5	293.706			293.164	3.10881			223.5	287.833			293.226	3.06301			223.5	287.755			293.068	3.31183
		224	291.155			293.645	3.70371			224	291.154			293.604	2.80264			224	290.938			293.368	3.16416			224	291.157			293.175	3.11491			224	291.649			293.253	3.06717			224	290.256			293.1	3.33943
		224.5	288.371			293.681	3.71414			224.5	298.38			293.614	2.79756			224.5	291.221			293.373	3.16834			224.5	290.885			293.175	3.11544			224.5	296.616			293.256	3.06289			224.5	297.963			293.075	3.32552
		225	296.292			293.701	3.69607			225	292.192			293.608	2.78908			225	292.82			293.351	3.20218			225	291.253			293.213	3.13489			225	291.237			293.284	3.07407			225	287.555			293.111	3.30649
		225.5	294.205			293.693	3.69211			225.5	290.897			293.6	2.79526			225.5	295.073			293.373	3.20323			225.5	295.055			293.247	3.14973			225.5	294.802			293.259	3.06696			225.5	302.993			293.136	3.30422
		226	289.584			293.699	3.69384			226	299.411			293.646	2.82551			226	290.331			293.368	3.20532			226	290.475			293.234	3.14745			226	295.221			293.257	3.06846			226	289.828			293.104	3.28832
		226.5	294.586			293.724	3.68289			226.5	288.767			293.615	2.7959			226.5	288.698			293.365	3.20408			226.5	293.825			293.255	3.14275			226.5	292.079			293.265	3.07398			226.5	290.244			293.106	3.2859
		227	294.565			293.708	3.68585			227	294.31			293.639	2.77473			227	292.281			293.392	3.20119			227	294.952			293.258	3.14365			227	296.403			293.231	3.08915			227	297.075			293.031	3.23134
		227.5	285.526			293.718	3.69084			227.5	298.078			293.657	2.79114			227.5	290.186			293.422	3.18536			227.5	291.112			293.218	3.17303			227.5	294.707			293.242	3.08879			227.5	288.144			293.045	3.22344
		228	295			293.769	3.64755			228	290.158			293.637	2.77361			228	290.463			293.433	3.18531			228	291.823			293.246	3.17909			228	291.96			293.227	3.08072			228	295.142			293.061	3.21749
		228.5	291.252			293.745	3.6552			228.5	291.35			293.631	2.78218			228.5	295.298			293.434	3.18457			228.5	293.943			293.245	3.17944			228.5	292.646			293.189	3.10983			228.5	295.217			293.027	3.2115
		229	296.333			293.752	3.65178			229	297.343			293.626	2.78726			229	295.773			293.458	3.18011			229	293.397			293.245	3.17944			229	289.54			293.222	3.1322			229	283.493			293.072	3.20715
		229.5	293.168			293.735	3.64762			229.5	292.614			293.574	2.81524			229.5	295.37			293.453	3.17797			229.5	293.954			293.257	3.18423			229.5	292.25			293.217	3.13434			229.5	294.599			293.028	3.23966
		230	287.743			293.747	3.64976			230	294.369			293.568	2.81803			230	294.856			293.445	3.17418			230	293.387			293.26	3.1855			230	293.05			293.247	3.12776			230	292.632			293.018	3.23597
		230.5	294.286			293.777	3.62486			230.5	292.592			293.562	2.81771			230.5	289.602			293.413	3.18656			230.5	292.798			293.255	3.1862			230.5	294.078			293.268	3.13516			230.5	288.289			293.07	3.16535
		231	291.057			293.756	3.63477			231	296.158			293.535	2.85125			231	289.258			293.4	3.18619			231	291.225			293.254	3.18642			231	294.039			293.266	3.13541			231	293.17			293.058	3.16411
		231.5	294.234			293.783	3.63517			231.5	293.409			293.52	2.84542			231.5	295.172			293.409	3.17755			231.5	290.664			293.247	3.19284			231.5	291.377			293.291	3.16283			231.5	294.463			293.074	3.17017
		232	300.895			293.784	3.63536			232	294.796			293.506	2.8523			232	294.98			293.43	3.16389			232	293.509			293.257	3.18775			232	294.89			293.287	3.16241			232	295.048			293.1	3.15212
		232.5	292.576			293.74	3.60233			232.5	292.453			293.501	2.85088			232.5	293.252			293.419	3.16163			232.5	291.825			293.267	3.19189			232.5	291.045			293.313	3.16877			232.5	290.204			293.116	3.1608
		233	294.73			293.737	3.60383			233	295.445			293.503	2.85032			233	293.731			293.399	3.16468			233	294.355			293.283	3.19232			233	296.834			293.316	3.17064			233	289.777			293.126	3.16798
		233.5	289.997			293.73	3.60324			233.5	296.46			293.49	2.8474			233.5	296.989			293.399	3.16469			233.5	290.862			293.275	3.19156			233.5	297.674			293.312	3.17396			233.5	295.194			293.093	3.18271
		234	293.298			293.755	3.59483			234	290.377			293.476	2.83968			234	290.498			293.367	3.19285			234	292.931			293.3	3.19169			234	288.568			293.268	3.18724			234	294.044			293.114	3.17769
		234.5	292.27			293.768	3.59743			234.5	294.782			293.479	2.83705			234.5	291.378			293.341	3.18454			234.5	293.454			293.319	3.20098			234.5	298.009			293.273	3.19594			234.5	295.007			293.129	3.16899
		235	295.92			293.743	3.62443			235	291.497			293.479	2.83715			235	295.638			293.366	3.18208			235	291.862			293.295	3.21819			235	292.79			293.277	3.19119			235	292.972			293.14	3.17913
		235.5	290.181			293.743	3.6246			235.5	294.315			293.505	2.84306			235.5	293.783			293.384	3.18104			235.5	294.506			293.316	3.22262			235.5	293.097			293.251	3.1736			235.5	290.83			293.127	3.18055
		236	291.918			293.754	3.61724			236	293.26			293.491	2.84614			236	297.852			293.379	3.178			236	287.748			293.299	3.22484			236	300.378			293.257	3.17368			236	289.953			293.112	3.17881
		236.5	297.199			293.792	3.63827			236.5	293.769			293.483	2.84919			236.5	295.942			293.363	3.18391			236.5	295.422			293.335	3.20267			236.5	292.224			293.266	3.17603			236.5	289.093			293.114	3.17885
		237	286.014			293.767	3.63223			237	293.823			293.485	2.84957			237	292.915			293.33	3.1712			237	290.912			293.302	3.21512			237	298.425			293.226	3.13651			237	293.377			293.105	3.18753
		237.5	296.38			293.781	3.60644			237.5	287.128			293.475	2.8518			237.5	292.413			293.336	3.17652			237.5	297.987			293.306	3.21239			237.5	293.777			293.238	3.1374			237.5	294.802			293.148	3.20356
		238	291.646			293.787	3.61131			238	297.524			293.482	2.83845			238	292.886			293.33	3.1784			238	295.06			293.297	3.20141			238	293.394			293.197	3.12277			238	294.29			293.155	3.19676
		238.5	296.319			293.798	3.60814			238.5	298.62			293.482	2.83915			238.5	290.832			293.326	3.17971			238.5	293.266			293.276	3.20339			238.5	296.83			293.219	3.14251			238.5	291.491			293.135	3.20729
		239	294.077			293.802	3.61107			239	295.506			293.475	2.82711			239	295.6			293.357	3.20446			239	299.641			293.285	3.20544			239	294.595			293.232	3.14804			239	292.567			293.156	3.23153
		239.5	294.411			293.775	3.62934			239.5	293.256			293.465	2.82345			239.5	291.36			293.358	3.20346			239.5	290.619			293.24	3.17875			239.5	294.888			293.202	3.14217			239.5	289.346			293.127	3.24733
		240	292.914			293.766	3.62999			240	296.025			293.441	2.84575			240	292.41			293.354	3.20136			240	301.538			293.249	3.17383			240	290.402			293.19	3.14123			240	299.139			293.156	3.25855
		240.5	293.062			293.767	3.62978			240.5	291.154			293.431	2.8402			240.5	298.763			293.354	3.20176			240.5	293.814			293.198	3.12177			240.5	288.943			293.185	3.13925			240.5	296.487			293.173	3.26441
		241	297.629			293.759	3.63331			241	293.185			293.437	2.83667			241	290.345			293.346	3.20609			241	291.624			293.178	3.13111			241	295.815			293.187	3.13737			241	287.713			293.165	3.27565
		241.5	290.006			293.742	3.6232			241.5	297.228			293.425	2.84321			241.5	295.732			293.324	3.18381			241.5	297.57			293.17	3.13699			241.5	295.817			293.204	3.12359			241.5	295.251			293.145	3.25081
		242	296.697			293.77	3.61558			242	295.68			293.403	2.83058			242	290.959			293.331	3.17873			242	287.934			293.153	3.12233			242	295.472			293.164	3.14214			242	288.316			293.135	3.24364
		242.5	293.214			293.738	3.6177			242.5	293.832			293.376	2.83553			242.5	292.366			293.334	3.18103			242.5	296.328			293.177	3.10055			242.5	295.07			293.158	3.13856			242.5	295.433			293.162	3.22079
		243	292.416			293.735	3.61838			243	292.644			293.355	2.8468			243	295.934			293.337	3.17915			243	296.134			293.175	3.09841			243	292.24			293.152	3.13525			243	295.28			293.146	3.2182
		243.5	299.331			293.738	3.61748			243.5	297.889			293.391	2.88281			243.5	293.845			293.341	3.1784			243.5	293.675			293.161	3.09137			243.5	286.392			293.124	3.14384			243.5	289.311			293.156	3.20663
		244	296.319			293.726	3.60291			244	292.236			293.372	2.86547			244	293.085			293.307	3.18791			244	296.755			293.157	3.09127			244	296.179			293.148	3.1553			244	294.254			293.171	3.22505
		244.5	290.262			293.712	3.59826			244.5	293.529			293.373	2.86509			244.5	292.176			293.309	3.18837			244.5	293.494			293.166	3.10477			244.5	291.724			293.175	3.12015			244.5	293.499			293.17	3.22393
		245	292.415			293.723	3.59122			245	297.286			293.371	2.86514			245	293.193			293.311	3.18839			245	293.738			293.168	3.10509			245	293.593			293.152	3.11459			245	299.574			293.2	3.21593
		245.5	294.968			293.717	3.59399			245.5	298.974			293.377	2.87568			245.5	296.214			293.307	3.19054			245.5	292.618			293.192	3.1277			245.5	293.927			293.165	3.11377			245.5	291.446			293.194	3.21507
		246	296.071			293.707	3.59343			246	293.622			293.363	2.8545			246	290.996			293.306	3.19061			246	288.944			293.184	3.13071			246	296.108			293.149	3.11977			246	292.876			293.194	3.21517
		246.5	292.908			293.678	3.59707			246.5	291.327			293.377	2.86353			246.5	297.121			293.267	3.20206			246.5	293.493			293.212	3.11742			246.5	294.02			293.155	3.12236			246.5	294.709			293.17	3.18502
		247	292.499			293.688	3.59752			247	293.728			293.412	2.8805			247	291.006			293.246	3.23098			247	294.192			293.235	3.13703			247	296.9			293.134	3.11626			247	293.42			293.179	3.18267
		247.5	288.785			293.694	3.59655			247.5	295.829			293.407	2.88087			247.5	292.053			293.241	3.22566			247.5	290.965			293.242	3.14073			247.5	293.895			293.136	3.11669			247.5	291.973			293.196	3.1903
		248	299.608			293.74	3.59258			248	295.049			293.386	2.87823			248	295.678			293.227	3.24124			248	295.449			293.258	3.13729			248	293.794			293.136	3.11754			248	297.065			293.194	3.18947
		248.5	291.225			293.696	3.57489			248.5	294.202			293.367	2.87966			248.5	286.796			293.231	3.24027			248.5	291.934			293.226	3.14787			248.5	290.065			293.141	3.11927			248.5	289.842			293.177	3.19709
		249	294.005			293.722	3.57576			249	297.793			293.356	2.8809			249	293.262			293.257	3.27943			249	292.926			293.242	3.14949			249	288.376			293.132	3.1198			249	297.986			293.185	3.19605
		249.5	296.114			293.701	3.58589			249.5	291.937			293.348	2.87118			249.5	290.284			293.269	3.25981			249.5	295.793			293.224	3.16183			249.5	289.766			293.154	3.11331			249.5	296.235			293.185	3.19674
		250	287.206			293.705	3.58876			250	291.546			293.376	2.88386			250	289.987			293.297	3.28299			250	292.87			293.195	3.16453			250	291.378			293.199	3.1105			250	291.255			293.206	3.18833
		250.5	297.39			293.72	3.56751			250.5	290.569			293.368	2.89083			250.5	299.746			293.321	3.27875			250.5	294.9			293.191	3.16549			250.5	294.424			293.232	3.10818			250.5	295.966			293.187	3.17127
		251	297.325			293.711	3.56038			251	291.751			293.374	2.88619			251	287.163			293.338	3.27842			251	291.471			293.203	3.17607			251	291.971			293.241	3.11319			251	286.299			293.194	3.17918
		251.5	284.847			293.696	3.55134			251.5	297.076			293.383	2.88392			251.5	298.873			293.279	3.26805			251.5	286.73			293.201	3.17706			251.5	291.067			293.221	3.11855			251.5	296.548			293.204	3.18418
		252	298.853			293.721	3.50568			252	290.209			293.362	2.87219			252	291.224			293.362	3.32184			252	294.255			293.245	3.14792			252	296.757			293.248	3.13214			252	288.623			293.19	3.18614
		252.5	291.913			293.701	3.48776			252.5	294.374			293.385	2.86494			252.5	293.814			293.293	3.34958			252.5	298.02			293.241	3.14719			252.5	291.068			293.232	3.15196			252.5	290.974			293.19	3.18474
		253	297.475			293.702	3.48742			253	294.797			293.382	2.86433			253	298.006			293.313	3.34935			253	293.675			293.234	3.1377			253	293.057			293.212	3.14215			253	296.066			293.206	3.20796
		253.5	297.487			293.699	3.48471			253.5	294.517			293.39	2.87015			253.5	288.059			293.347	3.38797			253.5	299.142			293.229	3.1378			253.5	292.206			293.25	3.162			253.5	288.025			293.21	3.20175
		254	289.775			293.681	3.47435			254	294.452			293.382	2.8692			254	296.228			293.286	3.41267			254	286.048			293.193	3.11109			254	289.826			293.218	3.19696			254	295.857			293.208	3.20401
		254.5	303.968			293.706	3.4644			254.5	297.46			293.384	2.87021			254.5	292.319			293.337	3.41034			254.5	291.531			293.242	3.07538			254.5	294.838			293.226	3.19638			254.5	294.785			293.21	3.20587
		255	288.387			293.665	3.38994			255	294.829			293.356	2.8577			255	295.331			293.301	3.41784			255	294.27			293.244	3.07413			255	298.798			293.244	3.18729			255	292.891			293.208	3.20795
		255.5	297.537			293.687	3.36981			255.5	298.293			293.348	2.85584			255.5	291.545			293.31	3.41753			255.5	284.957			293.262	3.0904			255.5	298.458			293.23	3.18637			255.5	294.089			293.214	3.21315
		256	296.942			293.659	3.36075			256	291.561			293.329	2.83549			256	290.842			293.336	3.45276			256	294.816			293.306	3.03401			256	292.231			293.217	3.16828			256	288.799			293.223	3.22044
		256.5	288.756			293.631	3.35694			256.5	293.67			293.329	2.83558			256.5	294.858			293.333	3.45456			256.5	289.924			293.279	3.04517			256.5	296.087			293.206	3.15403			256.5	292.206			293.232	3.22217
		257	300.614			293.652	3.33936			257	293.187			293.335	2.83744			257	296.495			293.366	3.4624			257	287.416			293.311	3.04375			257	286.801			293.222	3.15733			257	292.879			293.237	3.22411
		257.5	288.931			293.619	3.30278			257.5	289.017			293.349	2.8442			257.5	292.644			293.348	3.46441			257.5	295.446			293.33	3.01881			257.5	292.652			293.225	3.16045			257.5	288.298			293.262	3.20882
		258	290.87			293.63	3.29112			258	293.471			293.356	2.83559			258	291.094			293.331	3.4572			258	291.398			293.309	3.01827			258	292.567			293.258	3.12731			258	289.076			293.294	3.22967
		258.5	300.425			293.65	3.28665			258.5	288.919			293.355	2.83558			258.5	292.803			293.343	3.45909			258.5	295.097			293.327	3.01751			258.5	291.582			293.267	3.12841			258.5	292.105			293.289	3.23094
		259	287.352			293.628	3.25532			259	288.867			293.386	2.82085			259	290.803			293.352	3.4556			259	295.985			293.303	3.02217			259	299.758			293.278	3.12985			259	295.111			293.307	3.21314
		259.5	296.867			293.665	3.22583			259.5	297.607			293.393	2.81232			259.5	294.626			293.384	3.48098			259.5	293.108			293.319	3.04348			259.5	296.024			293.266	3.14164			259.5	295.452			293.346	3.20915
		260	296.15			293.651	3.218			260	291.949			293.355	2.80615			260	292.124			293.376	3.4888			260	292.252			293.334	3.04968			260	289.488			293.257	3.12629			260	294.267			293.346	3.20922
		260.5	290.787			293.649	3.21685			260.5	288.948			293.372	2.80829			260.5	287.968			293.363	3.48888			260.5	291.833			293.332	3.05043			260.5	294.037			293.22	3.13748			260.5	293.873			293.324	3.21259
		261	297.496			293.661	3.21072			261	296.283			293.378	2.80058			261	293.652			293.391	3.50094			261	293.425			293.368	3.07486			261	288.162			293.249	3.12942			261	295.147			293.326	3.21422
		261.5	297.459			293.665	3.21617			261.5	289.731			293.374	2.79688			261.5	297.975			293.405	3.48473			261.5	294.68			293.347	3.08784			261.5	299.683			293.256	3.13284			261.5	292.822			293.309	3.21766
		262	292.464			293.639	3.2065			262	296.859			293.387	2.78585			262	293.092			293.419	3.49159			262	293.737			293.352	3.09039			262	293.49			293.274	3.11361			262	295.362			293.321	3.22379
		262.5	291.603			293.643	3.20548			262.5	297.437			293.381	2.77961			262.5	297.321			293.394	3.47671			262.5	292.699			293.359	3.09303			262.5	291.04			293.255	3.08517			262.5	291.095			293.326	3.22725
		263	288.933			293.629	3.22134			263	295.692			293.368	2.76664			263	293.568			293.404	3.47869			263	295.849			293.367	3.09348			263	294.356			293.261	3.08726			263	289.628			293.338	3.23
		263.5	297.568			293.659	3.20538			263.5	293.965			293.35	2.76349			263.5	289.114			293.397	3.47251			263.5	288.741			293.359	3.08908			263.5	288.928			293.253	3.09591			263.5	298.128			293.329	3.22681
		264	299.002			293.635	3.1938			264	294.565			293.346	2.76314			264	294.763			293.396	3.47249			264	294.759			293.417	3.11011			264	289.616			293.286	3.14274			264	292.423			293.34	3.22288
		264.5	298.716			293.601	3.17277			264.5	291.234			293.345	2.76278			264.5	292.108			293.426	3.46121			264.5	292.713			293.399	3.11236			264.5	299.32			293.294	3.13325			264.5	292.401			293.35	3.21455
		265	291.304			293.575	3.15199			265	293.725			293.323	2.79729			265	295.65			293.453	3.49262			265	294.161			293.412	3.11454			265	293.019			293.312	3.12237			265	293.184			293.309	3.20458
		265.5	295.121			293.571	3.15531			265.5	294.44			293.349	2.82374			265.5	292.212			293.452	3.49303			265.5	292.071			293.381	3.13797			265.5	291.119			293.29	3.0951			265.5	286.358			293.326	3.20838
		266	295.977			293.572	3.15543			266	291.668			293.325	2.83461			266	293.984			293.423	3.49921			266	291.481			293.404	3.14598			266	294.206			293.287	3.09555			266	294.666			293.311	3.21988
		266.5	293.051			293.569	3.15343			266.5	293.992			293.351	2.84409			266.5	291.685			293.412	3.50658			266.5	289.215			293.432	3.1535			266.5	290.675			293.325	3.11591			266.5	293.639			293.283	3.24392
		267	292.092			293.575	3.1537			267	289.488			293.336	2.84875			267	298.011			293.428	3.51705			267	292.361			293.421	3.17236			267	300.505			293.292	3.142			267	290.612			293.328	3.20895
		267.5	295.445			293.578	3.15262			267.5	294.553			293.351	2.83653			267.5	288.525			293.461	3.53059			267.5	287.6			293.443	3.18025			267.5	288.523			293.303	3.13663			267.5	296.466			293.314	3.20926
		268	295.094			293.563	3.15075			268	293.067			293.375	2.8681			268	293.505			293.44	3.51589			268	291.884			293.457	3.16017			268	292.702			293.307	3.14666			268	290.251			293.321	3.21184
		268.5	297.126			293.571	3.15624			268.5	296.911			293.35	2.89338			268.5	291.639			293.487	3.51273			268.5	286.346			293.445	3.17052			268.5	297.636			293.32	3.13209			268.5	291.53			293.344	3.20877
		269	293.581			293.563	3.14952			269	294.755			293.363	2.91636			269	289.516			293.457	3.5388			269	290.757			293.477	3.13072			269	286.742			293.332	3.13428			269	299.191			293.298	3.23062
		269.5	287.257			293.561	3.14971			269.5	289.888			293.352	2.91539			269.5	295.741			293.468	3.53653			269.5	288.927			293.458	3.15864			269.5	294.795			293.282	3.14487			269.5	292.635			293.318	3.22396
		270	298.924			293.623	3.14762			270	296.34			293.353	2.91341			270	292.976			293.492	3.526			270	293.038			293.504	3.15944			270	294.801			293.306	3.11307			270	291.997			293.303	3.23784
		270.5	287.87			293.582	3.13142			270.5	293.267			293.326	2.91153			270.5	284.703			293.46	3.53467			270.5	298.142			293.472	3.19721			270.5	294.352			293.318	3.12302			270.5	293.218			293.278	3.21102
		271	292.776			293.613	3.10531			271	290.027			293.311	2.91933			271	296.524			293.443	3.54536			271	296.048			293.427	3.19445			271	293.149			293.274	3.1629			271	285.711			293.267	3.21627
		271.5	299.391			293.615	3.10496			271.5	297.08			293.355	2.93582			271.5	288.901			293.469	3.49982			271.5	291.061			293.446	3.22152			271.5	293.142			293.281	3.16732			271.5	300.783			293.242	3.24604
		272	285.477			293.596	3.08095			272	293.502			293.339	2.92416			272	294.134			293.439	3.49936			272	290.384			293.451	3.21877			272	292.984			293.301	3.17796			272	288.908			293.26	3.25566
		272.5	295.26			293.632	3.02743			272.5	296.507			293.307	2.95596			272.5	293.968			293.448	3.48983			272.5	289.384			293.471	3.21229			272.5	293.791			293.305	3.17835			272.5	291.163			293.285	3.21652
		273	295.993			293.63	3.02646			273	293.203			293.307	2.95579			273	294.114			293.446	3.4896			273	294.058			293.493	3.19923			273	289.882			293.328	3.19292			273	295.284			293.252	3.17256
		273.5	286.542			293.633	3.02973			273.5	288.327			293.272	2.99933			273.5	298.803			293.458	3.49557			273.5	293.144			293.485	3.19988			273.5	291.946			293.324	3.19281			273.5	289.202			293.255	3.1681
		274	299.092			293.675	2.98916			274	293.47			293.316	2.99225			274	289.651			293.454	3.49528			274	298.662			293.483	3.20028			274	295.548			293.32	3.1976			274	296.605			293.262	3.16505
		274.5	292.095			293.645	2.96477			274.5	291.704			293.291	3.01252			274.5	294.942			293.415	3.47877			274.5	295.945			293.445	3.18316			274.5	289.453			293.362	3.23289			274.5	295.821			293.268	3.17042
		275	293.536			293.617	3.00521			275	299.235			293.292	3.01207			275	292.524			293.445	3.47189			275	294.296			293.43	3.17857			275	289.827			293.327	3.24586			275	293.062			293.284	3.15798
		275.5	298.246			293.616	3.00525			275.5	289.731			293.281	2.99403			275.5	287.138			293.425	3.47452			275.5	289.861			293.428	3.17822			275.5	295.647			293.353	3.23512			275.5	295.956			293.288	3.16349
		276	291.575			293.573	3.00034			276	295.719			293.297	2.98355			276	297.398			293.44	3.47708			276	296.17			293.441	3.169			276	292.292			293.378	3.22716			276	290.608			293.274	3.15845
		276.5	294.791			293.582	2.99704			276.5	300.769			293.285	2.97862			276.5	290.826			293.484	3.45203			276.5	296.66			293.452	3.18241			276.5	296.998			293.366	3.22313			276.5	296.97			293.285	3.16209
		277	292.406			293.563	3.00183			277	288.934			293.257	2.93379			277	294.184			293.449	3.44722			277	290.34			293.421	3.18085			277	293.362			293.396	3.24037			277	295.226			293.259	3.16131
		277.5	290.272			293.563	3.00185			277.5	298.756			293.256	2.93528			277.5	294.922			293.482	3.45341			277.5	300.869			293.417	3.18494			277.5	293.325			293.364	3.23607			277.5	291.946			293.285	3.16013
		278	294.468			293.573	2.99403			278	291.57			293.234	2.91055			278	295.948			293.465	3.45834			278	291.474			293.388	3.14273			278	290.083			293.372	3.23782			278	296.468			293.264	3.1494
		278.5	289.303			293.544	3.01357			278.5	288.549			293.226	2.91745			278.5	294.028			293.484	3.47678			278.5	294.703			293.389	3.14223			278.5	297.166			293.378	3.23892			278.5	292.052			293.247	3.14794
		279	292.135			293.547	3.00985			279	298.628			293.251	2.8986			279	296.895			293.476	3.47287			279	293.648			293.419	3.18419			279	290.411			293.373	3.24459			279	295.643			293.238	3.15406
		279.5	295.534			293.537	3.01819			279.5	294.277			293.223	2.87346			279.5	291.075			293.463	3.47539			279.5	291.965			293.409	3.18663			279.5	292.317			293.364	3.23661			279.5	294.385			293.248	3.16709
		280	290.322			293.517	3.01819			280	290.818			293.208	2.87538			280	296.291			293.475	3.49055			280	295.445			293.404	3.18975			280	291.406			293.367	3.23417			280	292.377			293.249	3.1665
		280.5	297.859			293.521	3.01397			280.5	292.716			293.233	2.87578			280.5	296.873			293.478	3.4885			280.5	291.998			293.445	3.26684			280.5	290.989			293.379	3.23475			280.5	299.032			293.253	3.17005
		281	288.684			293.504	2.99885			281	297.526			293.257	2.89141			281	290.292			293.443	3.49526			281	291.412			293.397	3.35771			281	294.572			293.396	3.23302			281	291.539			293.256	3.17118
		281.5	287.94			293.546	2.99072			281.5	294.693			293.259	2.89572			281.5	293.266			293.444	3.49625			281.5	296.166			293.446	3.4007			281.5	289.173			293.407	3.22851			281.5	296.442			293.261	3.17057
		282	298.648			293.573	2.96428			282	292.55			293.244	2.89617			282	299.29			293.456	3.48965			282	286.926			293.415	3.40421			282	296.743			293.388	3.2328			282	290.322			293.265	3.17849
		282.5	292.684			293.559	2.94652			282.5	298.518			293.247	2.89576			282.5	291.019			293.441	3.49618			282.5	297.128			293.444	3.37324			282.5	294.336			293.428	3.23			282.5	292.972			293.312	3.22186
		283	297.297			293.565	2.94605			283	294.048			293.198	2.88955			283	289.314			293.393	3.48121			283	289.677			293.432	3.36429			283	288.688			293.414	3.22164			283	298.584			293.311	3.221
		283.5	296.614			293.564	2.94395			283.5	292.84			293.196	2.88905			283.5	291.199			293.417	3.4807			283.5	289.428			293.443	3.35565			283.5	296.658			293.397	3.22614			283.5	291.872			293.32	3.21524
		284	288.697			293.54	2.93852			284	296.322			293.208	2.89261			284	293.926			293.44	3.46875			284	299.946			293.455	3.34556			284	291.414			293.438	3.21857			284	296.458			293.316	3.21602
		284.5	296.15			293.569	2.91927			284.5	290.297			293.194	2.8843			284.5	294.086			293.46	3.46725			284.5	286.492			293.428	3.31454			284.5	292.323			293.416	3.21145			284.5	288.166			293.284	3.19487
		285	298.083			293.551	2.91451			285	294.365			293.21	2.87702			285	291.841			293.483	3.48579			285	294.928			293.435	3.30027			285	298.914			293.428	3.2084			285	290.827			293.262	3.2208
		285.5	288.671			293.521	2.89845			285.5	295.588			293.201	2.87629			285.5	292.191			293.476	3.48611			285.5	297.84			293.416	3.30296			285.5	289.053			293.436	3.20761			285.5	294.539			293.264	3.22312
		286	294.345			293.545	2.87799			286	293.475			293.193	2.87199			286	290.696			293.484	3.48417			286	289.311			293.415	3.30146			286	296.213			293.397	3.1878			286	292.265			293.287	3.20274
		286.5	292.858			293.547	2.8786			286.5	293.522			293.192	2.87192			286.5	297.939			293.499	3.48479			286.5	298.655			293.441	3.28963			286.5	292.752			293.436	3.18188			286.5	292.705			293.303	3.19821
		287	295.104			293.577	2.9035			287	293.247			293.186	2.87254			287	291.882			293.477	3.51571			287	287.305			293.397	3.27836			287	291.752			293.42	3.17593			287	295.574			293.296	3.197
		287.5	300.031			293.57	2.90149			287.5	292.119			293.188	2.87273			287.5	296.092			293.463	3.50366			287.5	294.8			293.437	3.25275			287.5	294.24			293.427	3.17596			287.5	293.105			293.326	3.21424
		288	290.393			293.543	2.8661			288	295.072			293.2	2.8735			288	300.077			293.482	3.50521			288	301.162			293.415	3.2586			288	290.951			293.448	3.17867			288	295.253			293.34	3.21745
		288.5	298.069			293.573	2.86418			288.5	291.008			293.198	2.87211			288.5	292.225			293.482	3.50503			288.5	289.952			293.375	3.2121			288.5	299.674			293.436	3.18001			288.5	289.643			293.341	3.21841
		289	294.075			293.535	2.85419			289	297.021			293.221	2.87366			289	298.02			293.459	3.47654			289	299.107			293.397	3.20386			289	289.778			293.448	3.1751			289	296.703			293.365	3.23403
		289.5	291.291			293.542	2.85729			289.5	295.477			293.184	2.87311			289.5	295.743			293.463	3.47565			289.5	292.703			293.38	3.18204			289.5	294.56			293.425	3.14591			289.5	291.555			293.337	3.24097
		290	295.113			293.556	2.85296			290	293.869			293.2	2.89477			290	289.506			293.44	3.46053			290	289.12			293.419	3.22223			290	291.686			293.453	3.13823			290	298.85			293.386	3.25839
		290.5	292.726			293.55	2.85098			290.5	294.996			293.203	2.89572			290.5	293.292			293.434	3.45776			290.5	297.425			293.441	3.20779			290.5	296.241			293.478	3.16851			290.5	295.198			293.388	3.26053
		291	292.448			293.57	2.85879			291	289.328			293.196	2.89305			291	295.925			293.455	3.44652			291	287.277			293.436	3.20231			291	294.138			293.483	3.16673			291	294.662			293.352	3.32115
		291.5	296.806			293.566	2.86067			291.5	294.158			293.227	2.88507			291.5	291.625			293.452	3.44698			291.5	299.333			293.46	3.17368			291.5	291.803			293.483	3.16716			291.5	295.876			293.358	3.3331
		292	289.496			293.566	2.86028			292	298.513			293.209	2.8901			292	293.428			293.423	3.45007			292	291.818			293.438	3.14794			292	291.858			293.467	3.17194			292	284.399			293.329	3.34224
		292.5	296.382			293.561	2.86839			292.5	289.733			293.203	2.87941			292.5	289.062			293.419	3.45261			292.5	294.407			293.451	3.14668			292.5	301.122			293.498	3.1857			292.5	292.734			293.338	3.34785
		293	295.345			293.556	2.86469			293	298.416			293.224	2.86934			293	294.05			293.42	3.45262			293	295.049			293.458	3.15048			293	289.178			293.503	3.1839			293	295.148			293.315	3.34578
		293.5	291.81			293.538	2.86497			293.5	293.651			293.187	2.84987			293.5	296.855			293.441	3.43875			293.5	291.063			293.459	3.15071			293.5	292.2			293.468	3.13795			293.5	290.744			293.342	3.29492
		294	295.462			293.533	2.86855			294	293.063			293.206	2.86576			294	287.612			293.43	3.4403			294	296.528			293.458	3.15112			294	291.498			293.482	3.12488			294	296.937			293.381	3.33467
		294.5	290.656			293.531	2.86731			294.5	291.786			293.227	2.88043			294.5	297.668			293.42	3.43352			294.5	287.466			293.443	3.1436			294.5	295.939			293.486	3.12374			294.5	289.349			293.384	3.33631
		295	292.933			293.559	2.8663			295	295.578			293.25	2.88734			295	288.604			293.441	3.41069			295	292.245			293.471	3.1151			295	290.3			293.516	3.13361			295	292.562			293.381	3.33869
		295.5	294.309			293.544	2.87764			295.5	288.215			293.26	2.89879			295.5	299.133			293.435	3.4041			295.5	295.135			293.467	3.11674			295.5	292.124			293.505	3.1289			295.5	293.007			293.365	3.32919
		296	291.106			293.551	2.88167			296	294.938			293.253	2.91243			296	292.444			293.453	3.38798			296	290.213			293.495	3.15625			296	296.679			293.533	3.12518			296	288.757			293.366	3.32847
		296.5	295.19			293.557	2.87807			296.5	290.271			293.251	2.91116			296.5	291.516			293.431	3.36538			296.5	292.872			293.529	3.15744			296.5	292.857			293.539	3.12361			296.5	294.03			293.386	3.33595
		297	292.589			293.549	2.87574			297	291.552			293.307	2.9627			297	297.354			293.421	3.3715			297	292.246			293.534	3.15724			297	294.279			293.51	3.12177			297	293.345			293.394	3.33677
		297.5	294.243			293.55	2.87556			297.5	292.388			293.282	2.99758			297.5	294.783			293.45	3.37959			297.5	291.723			293.576	3.19531			297.5	296.944			293.512	3.12146			297.5	286.643			293.424	3.32153
		298	291.742			293.552	2.87643			298	291.002			293.301	3.00344			298	295.772			293.401	3.39336			298	291.571			293.573	3.19738			298	290.296			293.507	3.12099			298	295.501			293.438	3.32995
		298.5	290.69			293.585	2.89387			298.5	290.038			293.295	3.00898			298.5	291.291			293.391	3.39223			298.5	293.833			293.592	3.19667			298.5	290.638			293.462	3.136			298.5	289.347			293.446	3.33203
		299	293.693			293.567	2.92306			299	295.712			293.321	3.00341			299	294.128			293.396	3.39645			299	294.272			293.603	3.20153			299	296.614			293.486	3.12959			299	293.463			293.467	3.30207
		299.5	293.188			293.584	2.93286			299.5	294.421			293.312	2.99885			299.5	294.061			293.385	3.40655			299.5	292.018			293.582	3.21062			299.5	287.512			293.495	3.1239			299.5	293.679			293.473	3.30631
		300	289.874			293.563	2.95081			300	291.626			293.293	3.00391			300	292.252			293.408	3.42606			300	294.648			293.629	3.25414			300	297.197			293.47	3.11871			300	289.447			293.483	3.2967
		300.5	288.651			293.586	2.94016			300.5	294.87			293.286	3.00902			300.5	293.369			293.397	3.42724			300.5	292.863			293.619	3.25383			300.5	288.777			293.481	3.10128			300.5	296.332			293.499	3.30491
		301	293.931			293.612	2.91935			301	296.001			293.273	3.0079			301	293.029			293.406	3.42666			301	293.649			293.609	3.25982			301	292.183			293.465	3.09023			301	289.763			293.485	3.31009
		301.5	297.523			293.595	2.92821			301.5	295.039			293.249	3.00555			301.5	292.694			293.403	3.42703			301.5	296.603			293.626	3.26925			301.5	295.202			293.511	3.08922			301.5	293.278			293.516	3.30047
		302	289.451			293.585	2.91854			302	291.467			293.247	3.00466			302	300.995			293.4	3.42752			302	293.21			293.584	3.28573			302	293.421			293.501	3.09754			302	292.173			293.477	3.31252
		302.5	298.304			293.602	2.90438			302.5	291.581			293.252	3.00249			302.5	284.509			293.408	3.42772			302.5	291.783			293.591	3.28645			302.5	293.749			293.52	3.12045			302.5	292.558			293.496	3.30194
		303	293.113			293.584	2.88647			303	292.594			293.267	3.00161			303	292.213			293.38	3.38803			303	296.306			293.623	3.30038			303	295.902			293.514	3.12181			303	294.73			293.51	3.30669
		303.5	292.42			293.571	2.89516			303.5	294.793			293.292	3.01679			303.5	298.309			293.427	3.32894			303.5	294.945			293.597	3.29945			303.5	294.379			293.478	3.1607			303.5	290.502			293.508	3.30773
		304	296.666			293.588	2.89842			304	290.021			293.298	3.02109			304	289.345			293.439	3.32889			304	291.861			293.594	3.29839			304	294.397			293.49	3.17479			304	299.021			293.502	3.3105
		304.5	291.529			293.574	2.89026			304.5	294.377			293.338	3.03036			304.5	300.192			293.411	3.31119			304.5	295.051			293.579	3.31228			304.5	295.852			293.482	3.17456			304.5	295.459			293.498	3.30961
		305	291.986			293.594	2.89024			305	293.486			293.335	3.02961			305	294.02			293.42	3.3024			305	288.752			293.561	3.31454			305	290.646			293.458	3.1854			305	296.975			293.534	3.31495
		305.5	293.683			293.6	2.88821			305.5	291.056			293.337	3.02979			305.5	291.364			293.411	3.286			305.5	296.068			293.579	3.29797			305.5	293.657			293.449	3.18104			305.5	293.064			293.511	3.29256
		306	291.246			293.577	2.90633			306	290.944			293.351	3.02588			306	292.875			293.387	3.29853			306	296.431			293.529	3.33578			306	293.361			293.445	3.18477			306	289.092			293.527	3.31048
		306.5	295.787			293.61	2.91749			306.5	292.647			293.368	3.02187			306.5	287.204			293.404	3.29656			306.5	298.157			293.553	3.37414			306.5	290.244			293.433	3.18847			306.5	289.544			293.499	3.30471
		307	296.073			293.584	2.9212			307	289.863			293.407	3.0616			307	290.543			293.414	3.29841			307	291.354			293.521	3.36065			307	291.868			293.429	3.18918			307	300.213			293.507	3.30535
		307.5	293.977			293.581	2.9193			307.5	291.831			293.435	3.05453			307.5	293.441			293.459	3.2741			307.5	292.889			293.534	3.35723			307.5	292.659			293.447	3.18128			307.5	289.713			293.5	3.31576
		308	295.273			293.573	2.92053			308	290.944			293.441	3.05249			308	295.992			293.507	3.30071			308	296.549			293.518	3.3681			308	297.474			293.461	3.18039			308	298.644			293.528	3.30584
		308.5	289.644			293.587	2.93618			308.5	294.996			293.427	3.07088			308.5	291.063			293.501	3.30175			308.5	291.918			293.494	3.36337			308.5	288.509			293.448	3.18919			308.5	297.06			293.492	3.27148
		309	294.058			293.59	2.93352			309	293.541			293.41	3.07141			309	292.827			293.485	3.29743			309	288.348			293.503	3.36155			309	296.222			293.447	3.18857			309	295.273			293.522	3.26357
		309.5	290.346			293.581	2.93462			309.5	296.645			293.437	3.09587			309.5	290.538			293.521	3.31			309.5	289.86			293.491	3.38593			309.5	293.506			293.471	3.16921			309.5	297.933			293.495	3.24311
		310	299.102			293.606	2.928			310	296.828			293.425	3.08809			310	295.874			293.524	3.30963			310	293.636			293.507	3.37618			310	293.484			293.442	3.17064			310	290.139			293.474	3.23343
		310.5	294.232			293.577	2.90199			310.5	293.405			293.417	3.08114			310.5	288.898			293.538	3.30286			310.5	295.518			293.509	3.37631			310.5	297.253			293.437	3.17131			310.5	292.83			293.452	3.23612
		311	297.42			293.568	2.90273			311	293.877			293.426	3.0839			311	292.925			293.542	3.30636			311	293.35			293.486	3.37847			311	289.164			293.43	3.17296			311	295.876			293.417	3.22511
		311.5	295.704			293.569	2.90382			311.5	294.721			293.414	3.08662			311.5	289.246			293.589	3.307			311.5	296.48			293.5	3.38386			311.5	296.007			293.42	3.16401			311.5	289.157			293.412	3.23088
		312	289.816			293.557	2.89995			312	291.868			293.404	3.0858			312	292.726			293.606	3.31174			312	293.808			293.451	3.41122			312	299.813			293.448	3.15124			312	293.967			293.426	3.23418
		312.5	301.365			293.562	2.89409			312.5	294.253			293.415	3.08432			312.5	294.915			293.612	3.30456			312.5	293.197			293.445	3.41168			312.5	287.397			293.449	3.15204			312.5	290.035			293.4	3.23516
		313	292.747			293.521	2.84097			313	290.683			293.406	3.08449			313	289.321			293.633	3.31183			313	295.626			293.455	3.41378			313	295.314			293.422	3.12016			313	290.404			293.451	3.24839
		313.5	286.539			293.546	2.85739			313.5	290.909			293.424	3.07899			313.5	298.903			293.636	3.31354			313.5	293.732			293.437	3.41196			313.5	287.501			293.46	3.09271			313.5	294.864			293.443	3.24914
		314	293.584			293.556	2.83709			314	292.205			293.442	3.07491			314	294.592			293.63	3.32226			314	294.561			293.436	3.41191			314	292.338			293.443	3.09177			314	295.774			293.43	3.26856
		314.5	290.148			293.572	2.84695			314.5	291.356			293.451	3.07384			314.5	294.146			293.617	3.30614			314.5	288.291			293.425	3.41159			314.5	295.694			293.468	3.06381			314.5	293.368			293.447	3.26162
		315	294.977			293.593	2.83698			315	295.695			293.468	3.07199			315	291.404			293.574	3.34741			315	294.101			293.441	3.39488			315	289.735			293.496	3.0797			315	292.697			293.437	3.26032
		315.5	301.568			293.568	2.84647			315.5	291.639			293.462	3.06879			315.5	292.421			293.588	3.35544			315.5	295.16			293.41	3.41714			315.5	295.136			293.485	3.07575			315.5	289.781			293.424	3.25618
		316	287.433			293.547	2.80187			316	295.508			293.466	3.06692			316	298.011			293.578	3.3652			316	288.788			293.395	3.41626			316	291.085			293.499	3.06486			316	292.678			293.42	3.25666
		316.5	295.773			293.581	2.76875			316.5	291.235			293.464	3.0656			316.5	295.56			293.568	3.37113			316.5	294.263			293.444	3.42006			316.5	291.938			293.491	3.06267			316.5	294.039			293.411	3.26121
		317	290.37			293.566	2.76527			317	294.109			293.469	3.06293			317	298.387			293.533	3.36135			317	295.663			293.422	3.42812			317	289.773			293.503	3.05792			317	289.782			293.431	3.25111
		317.5	291.244			293.59	2.7588			317.5	291.083			293.442	3.08009			317.5	296.676			293.524	3.35829			317.5	292.243			293.419	3.42616			317.5	288.782			293.529	3.06696			317.5	296.085			293.441	3.25178
		318	300.422			293.585	2.76471			318	289.89			293.449	3.07637			318	289.464			293.519	3.35154			318	293.012			293.426	3.42518			318	297.102			293.537	3.05919			318	292.064			293.454	3.25915
		318.5	286.541			293.566	2.73041			318.5	292.236			293.468	3.06603			318.5	289.505			293.468	3.38077			318.5	292.745			293.444	3.43247			318.5	292.903			293.536	3.06066			318.5	292.459			293.471	3.24874
		319	296.088			293.615	2.69195			319	295.03			293.481	3.06618			319	291.174			293.498	3.37185			319	295.376			293.456	3.43437			319	290.089			293.524	3.05145			319	295.901			293.463	3.24429
		319.5	295.198			293.586	2.69614			319.5	286.553			293.469	3.06458			319.5	293.223			293.495	3.37522			319.5	295.691			293.474	3.45375			319.5	293.837			293.522	3.05211			319.5	286.751			293.468	3.24286
		320	285.809			293.587	2.69656			320	293.721			293.499	3.02598			320	299.084			293.496	3.37486			320	296.752			293.47	3.45146			320	291.032			293.565	3.06475			320	289.512			293.481	3.24391
		320.5	300.113			293.653	2.66821			320.5	296.352			293.516	3.03683			320.5	291.502			293.498	3.37484			320.5	293.12			293.433	3.45605			320.5	291.911			293.565	3.06471			320.5	296.436			293.474	3.24026
		321	294.388			293.607	2.63625			321	292.837			293.5	3.03024			321	294.443			293.478	3.35339			321	290.494			293.428	3.45715			321	298.037			293.565	3.06432			321	289.244			293.514	3.20558
		321.5	296.191			293.609	2.63703			321.5	301.277			293.482	3.04589			321.5	300.219			293.485	3.35077			321.5	290.484			293.426	3.45912			321.5	290.114			293.584	3.06568			321.5	294.769			293.55	3.20096
		322	294.538			293.583	2.63716			322	290.312			293.426	3.00458			322	293.026			293.502	3.36384			322	294.954			293.453	3.4572			322	293.246			293.53	3.08122			322	294.161			293.551	3.20208
		322.5	289.642			293.599	2.65318			322.5	296.375			293.446	2.99702			322.5	298.291			293.468	3.3298			322.5	290.401			293.463	3.46453			322.5	293.034			293.542	3.07247			322.5	292.143			293.558	3.19449
		323	296.135			293.65	2.67562			323	288.509			293.426	2.99063			323	292.273			293.473	3.32989			323	296.51			293.452	3.47653			323	292.967			293.533	3.07658			323	299.148			293.564	3.19808
		323.5	296.766			293.65	2.67532			323.5	293.897			293.474	2.98831			323.5	296.342			293.44	3.31433			323.5	287.909			293.444	3.47104			323.5	296.431			293.539	3.07682			323.5	292.512			293.578	3.20653
		324	291.055			293.668	2.7076			324	294.651			293.449	3.00596			324	296.489			293.466	3.32607			324	295.978			293.456	3.45591			324	288.342			293.55	3.07868			324	294.896			293.585	3.2049
		324.5	298.328			293.701	2.71654			324.5	293.038			293.439	3.00531			324.5	286.362			293.442	3.32296			324.5	291			293.437	3.4523			324.5	297.315			293.52	3.07988			324.5	295.41			293.566	3.18323
		325	292.456			293.678	2.69668			325	297.254			293.459	3.01695			325	295.796			293.449	3.33189			325	298.639			293.447	3.44822			325	291.706			293.567	3.072			325	291.544			293.586	3.18838
		325.5	294.636			293.678	2.6969			325.5	290.622			293.441	3.00497			325.5	291.643			293.477	3.29556			325.5	297.979			293.38	3.47538			325.5	290.826			293.527	3.07387			325.5	287.849			293.604	3.20686
		326	295.373			293.668	2.69683			326	300.06			293.459	2.99883			326	294.518			293.492	3.31299			326	292.592			293.369	3.46378			326	296.288			293.52	3.0804			326	287.836			293.611	3.21224
		326.5	294.648			293.677	2.70483			326.5	293.277			293.448	2.97743			326.5	295.741			293.491	3.31338			326.5	294.571			293.353	3.47405			326.5	288.495			293.54	3.07593			326.5	292.712			293.635	3.21429
		327	291.453			293.684	2.70938			327	293.456			293.43	2.9884			327	294.804			293.481	3.31347			327	294.46			293.37	3.48773			327	294.18			293.493	3.10637			327	293.524			293.649	3.19519
		327.5	296.557			293.683	2.71033			327.5	297.974			293.446	2.99631			327.5	294.545			293.46	3.31223			327.5	286.908			293.367	3.48702			327.5	293.521			293.551	3.12185			327.5	290.12			293.693	3.17574
		328	295.745			293.68	2.70784			328	294.003			293.429	2.98037			328	290.334			293.456	3.31117			328	296.723			293.398	3.4569			328	287.021			293.545	3.12178			328	297.348			293.702	3.17526
		328.5	290.191			293.676	2.70535			328.5	288.986			293.409	2.99057			328.5	295.241			293.434	3.31885			328.5	291.673			293.407	3.46889			328.5	298.635			293.533	3.12655			328.5	286.247			293.695	3.17719
		329	292.64			293.674	2.70892			329	290.335			293.412	2.98617			329	294.279			293.461	3.31564			329	293.942			293.403	3.47139			329	291.483			293.597	3.12432			329	293.214			293.705	3.16857
		329.5	292.942			293.692	2.71423			329.5	286.864			293.445	2.98837			329.5	294.211			293.441	3.31718			329.5	295.723			293.404	3.47151			329.5	295.552			293.569	3.10398			329.5	293.944			293.666	3.17176
		330	295.598			293.714	2.72612			330	291.557			293.443	2.99309			330	289.011			293.422	3.32281			330	294.709			293.385	3.46912			330	296.463			293.558	3.11565			330	292.177			293.727	3.14466
		330.5	293.791			293.691	2.72945			330.5	293.028			293.469	2.9992			330.5	292.13			293.412	3.3235			330.5	292.302			293.378	3.46785			330.5	292.664			293.569	3.12633			330.5	295.871			293.71	3.15635
		331	289.937			293.698	2.73116			331	287.308			293.457	3.00575			331	291.544			293.422	3.31331			331	292.558			293.389	3.46778			331	299.209			293.518	3.16198			331	293.53			293.696	3.16139
		331.5	296.586			293.684	2.75653			331.5	293.003			293.514	2.99855			331.5	293.396			293.447	3.32243			331.5	289.744			293.404	3.47102			331.5	293.11			293.54	3.17112			331.5	296.42			293.685	3.17015
		332	294.472			293.678	2.75148			332	290.71			293.511	2.99937			332	292.983			293.471	3.32555			332	292.802			293.408	3.46764			332	296.728			293.511	3.14542			332	296.42			293.69	3.17353
		332.5	292.009			293.697	2.76963			332.5	293.727			293.5	3.01458			332.5	290.895			293.454	3.33471			332.5	295.574			293.447	3.50431			332.5	295.517			293.496	3.15432			332.5	288.369			293.703	3.1789
		333	291.862			293.678	2.7933			333	292.821			293.538	3.06441			333	293.204			293.468	3.33916			333	294.904			293.419	3.5092			333	290.254			293.499	3.1575			333	294.525			293.674	3.18094
		333.5	293.371			293.69	2.79067			333.5	292.819			293.527	3.07024			333.5	287.389			293.496	3.34101			333.5	292.847			293.426	3.51339			333.5	287.863			293.452	3.19683			333.5	292.748			293.658	3.1751
		334	295.132			293.687	2.79148			334	293.777			293.545	3.07618			334	291.737			293.494	3.34131			334	295.748			293.436	3.51444			334	298.793			293.462	3.18991			334	297.272			293.683	3.15274
		334.5	295.75			293.672	2.79182			334.5	290.903			293.565	3.09076			334.5	295.594			293.566	3.36358			334.5	296.775			293.415	3.51323			334.5	289.264			293.513	3.18035			334.5	291.508			293.69	3.15623
		335	287.337			293.673	2.79283			335	294.822			293.566	3.08955			335	295.009			293.571	3.36154			335	288.604			293.408	3.50792			335	292.918			293.502	3.16617			335	291.96			293.713	3.16651
		335.5	295.975			293.708	2.75692			335.5	296.763			293.572	3.09267			335.5	294.486			293.571	3.36151			335.5	296.095			293.415	3.49962			335.5	293.816			293.542	3.16279			335.5	293.392			293.698	3.1566
		336	292.308			293.703	2.75337			336	291.455			293.544	3.08905			336	290.598			293.599	3.39664			336	291.234			293.388	3.49984			336	294.997			293.532	3.16764			336	289.079			293.699	3.15584
		336.5	299.6			293.697	2.75779			336.5	291.609			293.568	3.09149			336.5	291.309			293.58	3.40225			336.5	294.903			293.435	3.53406			336.5	292.258			293.546	3.17538			336.5	298.655			293.716	3.15544
		337	292.07			293.692	2.74838			337	294.196			293.597	3.10058			337	297.016			293.631	3.43301			337	288.801			293.417	3.5356			337	294.692			293.556	3.18224			337	290.365			293.732	3.16164
		337.5	288.991			293.682	2.75784			337.5	291.849			293.576	3.11017			337.5	291.733			293.645	3.42915			337.5	291.818			293.452	3.52459			337.5	290.251			293.542	3.19312			337.5	289.465			293.762	3.14557
		338	297.495			293.701	2.73833			338	288.465			293.598	3.1132			338	291.747			293.598	3.44668			338	296.107			293.458	3.52277			338	298.214			293.541	3.1926			338	298.973			293.723	3.13241
		338.5	293.955			293.65	2.76378			338.5	297.621			293.604	3.10413			338.5	298.982			293.626	3.45438			338.5	290.905			293.452	3.51897			338.5	295.868			293.584	3.20558			338.5	288.474			293.737	3.12364
		339	297.051			293.658	2.76751			339	297.056			293.608	3.10945			339	291.098			293.627	3.45405			339	294.901			293.498	3.54723			339	290.835			293.544	3.19686			339	297.304			293.753	3.1097
		339.5	288.636			293.672	2.79112			339.5	293.577			293.603	3.10501			339.5	294.886			293.596	3.43338			339.5	290.691			293.494	3.54606			339.5	292.318			293.539	3.19402			339.5	295.993			293.723	3.08789
		340	292.608			293.695	2.7685			340	288.421			293.594	3.10812			340	291.236			293.62	3.43222			340	292.44			293.492	3.54842			340	293.824			293.552	3.18825			340	287.754			293.735	3.0718
		340.5	293.121			293.701	2.76749			340.5	294.059			293.639	3.09837			340.5	290.812			293.598	3.43782			340.5	291.333			293.525	3.57035			340.5	290.863			293.545	3.1922			340.5	294.994			293.738	3.07609
		341	291.391			293.707	2.7674			341	292.343			293.606	3.12826			341	294.326			293.635	3.45136			341	289.713			293.501	3.60222			341	292.282			293.533	3.19602			341	294.516			293.706	3.08642
		341.5	294.356			293.728	2.76585			341.5	290.693			293.599	3.13262			341.5	291.769			293.644	3.44618			341.5	290.048			293.505	3.59803			341.5	287.691			293.551	3.19111			341.5	293.187			293.749	3.06287
		342	295.496			293.726	2.76558			342	292.95			293.637	3.14375			342	296.28			293.635	3.4467			342	294.196			293.543	3.60128			342	294.76			293.559	3.18991			342	292.125			293.743	3.06158
		342.5	290.33			293.711	2.76424			342.5	290.095			293.636	3.14415			342.5	291.534			293.669	3.46159			342.5	292.652			293.515	3.61751			342.5	294.259			293.592	3.16286			342.5	290.234			293.748	3.06415
		343	292.612			293.741	2.76068			343	289.755			293.657	3.13453			343	293.359			293.622	3.49052			343	295.875			293.533	3.62216			343	289.328			293.579	3.16305			343	298.535			293.744	3.06565
		343.5	293.071			293.76	2.7653			343.5	299.838			293.674	3.12251			343.5	288.974			293.642	3.49027			343.5	293.439			293.516	3.61904			343.5	297.039			293.585	3.16536			343.5	294.903			293.747	3.06421
		344	296.942			293.745	2.77617			344	294.002			293.627	3.10022			344	294.238			293.635	3.49216			344	292.775			293.521	3.6196			344	291.854			293.593	3.15684			344	295.351			293.764	3.054
		344.5	293.465			293.766	2.81374			344.5	292.447			293.634	3.10242			344.5	293.582			293.665	3.47762			344.5	298.606			293.525	3.61922			344.5	291.696			293.577	3.1474			344.5	293.06			293.744	3.03548
		345	292.368			293.749	2.82468			345	293.099			293.641	3.10135			345	291.302			293.658	3.47803			345	293.875			293.469	3.62649			345	294.18			293.613	3.16834			345	293.664			293.718	3.04749
		345.5	291.336			293.748	2.8254			345.5	298.609			293.622	3.11735			345.5	292.983			293.641	3.48627			345.5	298.518			293.491	3.64181			345.5	290.388			293.616	3.16686			345.5	294.685			293.731	3.05976
		346	292.829			293.784	2.84098			346	296.041			293.611	3.10434			346	288.469			293.684	3.50938			346	291.165			293.467	3.62438			346	295.109			293.608	3.16736			346	293.146			293.73	3.05988
		346.5	290.393			293.77	2.85307			346.5	296.595			293.621	3.11445			346.5	286.752			293.638	3.57667			346.5	294.416			293.454	3.63686			346.5	292.059			293.613	3.16291			346.5	296.322			293.716	3.06644
		347	294.804			293.773	2.8503			347	298.27			293.629	3.12499			347	296.102			293.665	3.5578			347	298.184			293.475	3.65375			347	294.282			293.631	3.18073			347	294.307			293.71	3.06571
		347.5	293.82			293.767	2.84938			347.5	292.684			293.615	3.11019			347.5	288.222			293.699	3.52372			347.5	295.596			293.446	3.63925			347.5	297.039			293.66	3.1936			347.5	290.058			293.69	3.08209
		348	298.033			293.749	2.86013			348	291.699			293.631	3.11369			348	292.874			293.675	3.52408			348	294.199			293.432	3.63631			348	294.789			293.642	3.20043			348	293.537			293.676	3.07639
		348.5	290.664			293.741	2.85012			348.5	291.269			293.648	3.11246			348.5	300.793			293.712	3.50544			348.5	288.979			293.438	3.63845			348.5	292.086			293.624	3.19134			348.5	297.178			293.667	3.07747
		349	296.431			293.763	2.8433			349	291.903			293.659	3.10796			349	289.244			293.717	3.50495			349	295.166			293.434	3.6441			349	294.314			293.627	3.19275			349	293.901			293.678	3.06809
		349.5	289.891			293.727	2.8552			349.5	296.275			293.687	3.11745			349.5	298.791			293.681	3.46869			349.5	289.274			293.443	3.65088			349.5	297.598			293.622	3.19623			349.5	294.311			293.698	3.07937
		350	296.854			293.759	2.84852			350	297.44			293.685	3.11621			350	295.2			293.715	3.45805			350	290.033			293.457	3.64022			350	296.216			293.618	3.19586			350	297.585			293.675	3.07039
		350.5	290.262			293.71	2.88036			350.5	289.998			293.631	3.14411			350.5	288.024			293.692	3.43941			350.5	292.043			293.488	3.63712			350.5	290.391			293.579	3.19474			350.5	286.428			293.68	3.07192
		351	295.544			293.732	2.87092			351	291.794			293.673	3.15185			351	303.735			293.696	3.44177			351	297.237			293.499	3.63607			351	297.537			293.539	3.21234			351	299.571			293.672	3.07234
		351.5	294.204			293.686	2.91727			351.5	293.554			293.698	3.15596			351.5	285.107			293.684	3.43778			351.5	291.141			293.456	3.6423			351.5	287.809			293.554	3.21101			351.5	289.583			293.647	3.06058
		352	289.955			293.662	2.9319			352	292.904			293.701	3.15625			352	295.306			293.71	3.41446			352	295.524			293.467	3.63861			352	292.772			293.55	3.21531			352	290.404			293.652	3.05366
		352.5	294.883			293.689	2.92229			352.5	294.676			293.717	3.15981			352.5	300.543			293.671	3.34349			352.5	293.56			293.453	3.63602			352.5	298.67			293.539	3.20568			352.5	296.452			293.645	3.0477
		353	292.05			293.647	2.96391			353	293.913			293.704	3.16122			353	285.872			293.701	3.29289			353	296.546			293.457	3.63657			353	286.581			293.604	3.2209			353	287.776			293.652	3.03202
		353.5	296.935			293.644	2.96639			353.5	296.33			293.688	3.16764			353.5	298.254			293.707	3.29729			353.5	292.665			293.457	3.63682			353.5	293.765			293.581	3.24381			353.5	296.901			293.638	3.01092
		354	293.731			293.623	2.95769			354	292.96			293.647	3.18706			354	289.001			293.658	3.26831			354	291.87			293.457	3.63694			354	293.505			293.543	3.22851			354	296.644			293.671	3.00241
		354.5	294.934			293.608	2.96515			354.5	294.902			293.649	3.18673			354.5	294.05			293.695	3.22153			354.5	295.903			293.475	3.63792			354.5	292.055			293.575	3.19084			354.5	294.75			293.668	3.00565
		355	295.597			293.603	2.96378			355	291.823			293.645	3.18562			355	300.548			293.684	3.20956			355	292.062			293.455	3.6354			355	296.086			293.58	3.19186			355	295.025			293.661	3.00051
		355.5	292.813			293.581	2.96512			355.5	293.111			293.66	3.18425			355.5	290.953			293.698	3.19504			355.5	297.845			293.447	3.64025			355.5	296.31			293.581	3.1919			355.5	293.828			293.67	2.98541
		356	292.017			293.581	2.96524			356	294.516			293.698	3.22148			356	297.483			293.695	3.19502			356	293.805			293.452	3.64719			356	295.475			293.573	3.19825			356	298.544			293.661	2.97828
		356.5	291.247			293.568	2.97727			356.5	291.533			293.668	3.24108			356.5	291.114			293.658	3.158			356.5	289.306			293.445	3.64781			356.5	296.706			293.55	3.19631			356.5	291.956			293.644	2.97088
		357	293.072			293.588	2.9748			357	294.824			293.704	3.25633			357	293.154			293.669	3.1525			357	296.399			293.483	3.64424			357	293.295			293.522	3.19648			357	291.784			293.64	2.96993
		357.5	293.952			293.613	2.99127			357.5	296.118			293.704	3.25648			357.5	295.09			293.634	3.14854			357.5	291.169			293.489	3.64972			357.5	294.581			293.5	3.19827			357.5	296.931			293.637	2.96873
		358	291.046			293.628	3.00064			358	290.351			293.672	3.26403			358	292.825			293.623	3.1615			358	291.354			293.471	3.67045			358	294.79			293.463	3.20501			358	292.067			293.621	2.97578
		358.5	294.979			293.633	2.99682			358.5	293.38			293.694	3.2563			358.5	299.315			293.631	3.16238			358.5	294.984			293.474	3.66871			358.5	289.081			293.478	3.21166			358.5	290.608			293.602	2.95629
		359	295.888			293.624	2.99559			359	295.148			293.693	3.25635			359	289.199			293.631	3.16236			359	290.348			293.46	3.66843			359	298.064			293.467	3.21155			359	295.892			293.599	2.95813
		359.5	294.826			293.607	2.99217			359.5	290.097			293.672	3.26045			359.5	292.068			293.629	3.1632			359.5	299.055			293.453	3.67505			359.5	288.58			293.465	3.21091			359.5	291.018			293.614	2.95649
		360	294.122			293.62	3.00331			360	290.058			293.697	3.25218			360	297.659			293.588	3.14237			360	296.084			293.456	3.67955			360	295.233			293.49	3.196			360	296.166			293.62	2.96348
		360.5	295.834			293.613	3.00395			360.5	295.462			293.713	3.24213			360.5	290.76			293.625	3.13464			360.5	291.891			293.426	3.68317			360.5	295.461			293.456	3.18345			360.5	296.108			293.623	2.96198
		361	293.071			293.604	3.00004			361	290.066			293.686	3.25065			361	296.507			293.644	3.13645			361	299.027			293.432	3.6816			361	291.804			293.491	3.16859			361	295.274			293.659	2.96904
		361.5	298.321			293.6	3.00146			361.5	295.452			293.692	3.24477			361.5	292.92			293.63	3.1247			361.5	289.356			293.435	3.68706			361.5	295.739			293.474	3.16858			361.5	293.525			293.65	2.96492
		362	292.212			293.558	2.99395			362	292.384			293.687	3.24281			362	295.082			293.651	3.11948			362	295.568			293.435	3.68804			362	294.876			293.467	3.1658			362	293.299			293.652	2.9634
		362.5	293.363			293.591	3.0159			362.5	295.65			293.705	3.24531			362.5	296.012			293.594	3.17009			362.5	295.201			293.456	3.71344			362.5	289.314			293.478	3.16386			362.5	291.558			293.676	3.00502
		363	288.685			293.58	3.02139			363	294.831			293.726	3.273			363	293.354			293.593	3.17051			363	294.362			293.455	3.71275			363	300.971			293.443	3.17806			363	290.113			293.678	3.00598
		363.5	294.941			293.622	3.01215			363.5	291.961			293.718	3.27233			363.5	295.115			293.591	3.16982			363.5	294.222			293.429	3.72427			363.5	290.609			293.437	3.17647			363.5	295.69			293.651	3.0156
		364	292.902			293.618	3.01087			364	293.314			293.738	3.27388			364	300.164			293.577	3.16534			364	300.292			293.452	3.74357			364	293.1			293.425	3.19583			364	289.383			293.671	3.0277
		364.5	292.132			293.573	3.08576			364.5	294.388			293.727	3.27877			364.5	291.908			293.576	3.16545			364.5	291.259			293.431	3.71674			364.5	294.881			293.39	3.15089			364.5	287.749			293.657	3.03496
		365	293.509			293.627	3.1542			365	286.793			293.742	3.28889			365	289.765			293.593	3.18397			365	295.194			293.457	3.7197			365	292.494			293.407	3.14511			365	295.199			293.683	3.03866
		365.5	290.517			293.617	3.15809			365.5	298.803			293.791	3.25776			365.5	289.992			293.556	3.15045			365.5	287.929			293.455	3.71877			365.5	298.778			293.408	3.14504			365.5	291.835			293.684	3.03714
		366	295.166			293.642	3.15337			366	289.66			293.742	3.25554			366	297.287			293.576	3.15288			366	296.829			293.474	3.69997			366	287.537			293.416	3.15041			366	295.156			293.688	3.04036
		366.5	295.378			293.641	3.1528			366.5	297.019			293.759	3.24306			366.5	298.144			293.569	3.16179			366.5	297.055			293.436	3.70521			366.5	292.899			293.423	3.14988			366.5	295.205			293.727	3.03471
		367	294.359			293.591	3.20264			367	290.95			293.736	3.23634			367	293.878			293.582	3.15239			367	286.977			293.434	3.70333			367	301.329			293.404	3.12907			367	287.177			293.745	3.00944
		367.5	292.658			293.598	3.20576			367.5	292.359			293.739	3.23391			367.5	297.933			293.549	3.14815			367.5	296.774			293.479	3.67978			367.5	291.137			293.454	3.11472			367.5	294.219			293.746	3.01002
		368	292.498			293.586	3.2142			368	299.481			293.742	3.23293			368	287.424			293.515	3.13555			368	290.489			293.468	3.67305			368	295.092			293.454	3.11464			368	288.736			293.758	3.00706
		368.5	296.609			293.577	3.21922			368.5	287.957			293.704	3.21			368.5	293.827			293.512	3.13549			368.5	289.507			293.503	3.67898			368.5	287.652			293.416	3.06427			368.5	294.052			293.77	3.01861
		369	295.616			293.586	3.23031			369	299.629			293.736	3.18435			369	294.431			293.484	3.12095			369	292.778			293.507	3.6753			369	291.472			293.401	3.08347			369	290.612			293.736	3.04132
		369.5	293.077			293.561	3.23393			369.5	292.453			293.73	3.17404			369.5	289.316			293.51	3.09176			369.5	286.951			293.518	3.67644			369.5	297.127			293.39	3.08133			369.5	286.956			293.779	3.00897
		370	299.717			293.563	3.23379			370	290.239			293.738	3.17283			370	289.541			293.504	3.09237			370	298.146			293.548	3.64707			370	286.074			293.434	3.06202			370	296.771			293.782	3.00957
		370.5	290.78			293.538	3.20517			370.5	290.729			293.749	3.16413			370.5	289.883			293.488	3.09554			370.5	286.544			293.5	3.65			370.5	295.869			293.447	3.05914			370.5	290.624			293.792	2.99534
		371	294.086			293.513	3.24464			371	290.302			293.767	3.15704			371	290.491			293.536	3.10434			371	289.15			293.537	3.61672			371	296.96			293.428	3.048			371	294.194			293.815	3.01418
		371.5	293.103			293.53	3.25695			371.5	298.831			293.79	3.1485			371.5	290.726			293.524	3.12419			371.5	299.883			293.553	3.60447			371.5	294.029			293.448	3.01264			371.5	289.609			293.831	3.00562
		372	295.546			293.534	3.25684			372	293.873			293.764	3.12817			372	293.848			293.54	3.11364			372	291.979			293.511	3.57916			372	297.626			293.414	3.02405			372	292.512			293.875	2.9694
		372.5	292.706			293.483	3.30331			372.5	287.205			293.751	3.13333			372.5	296.378			293.563	3.10808			372.5	294.522			293.532	3.58247			372.5	293.039			293.411	3.0209			372.5	296.555			293.854	2.96398
		373	294.85			293.504	3.3118			373	296.475			293.791	3.10077			373	293.282			293.583	3.10273			373	293.716			293.528	3.58178			373	289.088			293.403	3.02136			373	292.274			293.865	2.956
		373.5	296.719			293.486	3.3145			373.5	286.087			293.769	3.09757			373.5	291.003			293.575	3.10434			373.5	292.41			293.536	3.58427			373.5	300.204			293.405	3.02443			373.5	297.518			293.861	2.95606
		374	294.975			293.465	3.30738			374	297.317			293.807	3.04934			374	295.613			293.579	3.10829			374	292.693			293.526	3.59079			374	288.7			293.397	3.02764			374	292.897			293.892	2.94367
		374.5	292.978			293.459	3.30573			374.5	288.367			293.785	3.03971			374.5	291.005			293.577	3.10845			374.5	291.193			293.552	3.6046			374.5	294.467			293.417	3.01226			374.5	295.426			293.913	2.94898
		375	286.515			293.447	3.31191			375	291.883			293.819	3.01688			375	295.523			293.622	3.13491			375	292.769			293.549	3.6072			375	294.876			293.4	2.98272			375	290.778			293.913	2.94902
		375.5	293.386			293.508	3.29728			375.5	296.989			293.837	3.01583			375.5	295.796			293.616	3.13224			375.5	293.98			293.58	3.6278			375.5	293.386			293.398	2.98599			375.5	295.642			293.924	2.94697
		376	289.627			293.463	3.36158			376	292.919			293.79	3.03861			376	290.493			293.632	3.12713			376	292.399			293.566	3.63167			376	298.214			293.387	2.98581			376	292.777			293.911	2.93684
		376.5	293.373			293.492	3.35394			376.5	293.387			293.789	3.03908			376.5	297.399			293.627	3.12493			376.5	298.39			293.577	3.6314			376.5	290.631			293.391	2.98819			376.5	291.816			293.903	2.94146
		377	290.883			293.477	3.36173			377	295.064			293.798	3.04076			377	290.775			293.572	3.18319			377	290.536			293.56	3.61666			377	294.869			293.371	3.00179			377	290.191			293.91	2.9467
		377.5	292.394			293.486	3.35711			377.5	288.736			293.797	3.04015			377.5	298.723			293.616	3.20155			377.5	289.587			293.569	3.61125			377.5	294.567			293.346	2.98211			377.5	298.411			293.916	2.94149
		378	292.35			293.475	3.36389			378	294.451			293.829	3.0208			378	294.313			293.588	3.19281			378	294.928			293.565	3.61594			378	289.114			293.35	2.97944			378	292.419			293.893	2.94666
		378.5	288.629			293.479	3.36305			378.5	289.944			293.822	3.02104			378.5	291.524			293.588	3.19341			378.5	291.646			293.579	3.62647			378.5	295.401			293.335	2.97936			378.5	296.442			293.907	2.94809
		379	289.868			293.486	3.35469			379	293.491			293.834	3.01036			379	299.193			293.585	3.1886			379	300.805			293.57	3.63357			379	291.002			293.315	2.98416			379	294.898			293.899	2.95638
		379.5	290.073			293.502	3.34495			379.5	293.008			293.804	3.04432			379.5	291.772			293.568	3.19382			379.5	291.635			293.558	3.6133			379.5	294.738			293.319	2.97934			379.5	293.329			293.935	2.95552
		380	291.519			293.521	3.33613			380	291.392			293.826	3.0541			380	289.288			293.593	3.1979			380	290.947			293.57	3.61094			380	294.687			293.31	2.97578			380	299.839			293.915	2.93863
		380.5	291.253			293.531	3.33311			380.5	295.718			293.819	3.0606			380.5	297.068			293.569	3.17364			380.5	303.604			293.579	3.60679			380.5	293.258			293.331	2.97425			380.5	300.905			293.901	2.95262
		381	294.346			293.55	3.33117			381	297.523			293.811	3.05769			381	292.556			293.571	3.17241			381	282.356			293.532	3.53635			381	290.77			293.311	2.97819			381	296.261			293.895	2.94854
		381.5	297.228			293.544	3.33085			381.5	298.076			293.794	3.04641			381.5	290.431			293.585	3.15979			381.5	301.305			293.582	3.44727			381.5	297.193			293.292	2.98181			381.5	292.043			293.896	2.9489
		382	293.263			293.508	3.32998			382	291.641			293.766	3.03245			382	289.714			293.565	3.15038			382	289.928			293.536	3.40537			382	293.971			293.308	2.99066			382	292.263			293.884	2.95602
		382.5	295.764			293.527	3.33968			382.5	293.151			293.793	3.03693			382.5	295.638			293.574	3.1501			382.5	292.875			293.552	3.39588			382.5	290.829			293.301	2.99801			382.5	292.26			293.88	2.94967
		383	294.028			293.538	3.35048			383	288.655			293.763	3.0716			383	294.065			293.605	3.14967			383	294.687			293.538	3.40431			383	296.975			293.29	2.98761			383	287.366			293.803	2.96787
		383.5	296.95			293.549	3.35568			383.5	293.567			293.805	3.05883			383.5	295.181			293.584	3.18966			383.5	291.846			293.513	3.4139			383.5	292.274			293.29	2.98765			383.5	296.892			293.806	2.97037
		384	291.82			293.558	3.3672			384	295.263			293.8	3.05988			384	298.557			293.586	3.19099			384	291.824			293.537	3.41925			384	293.792			293.299	2.98295			384	292.862			293.814	2.96777
		384.5	294.573			293.545	3.37864			384.5	293.587			293.801	3.06015			384.5	292.579			293.547	3.23239			384.5	294.439			293.551	3.41772			384.5	293.904			293.281	2.97155			384.5	293.889			293.818	2.96606
		385	292.483			293.584	3.4357			385	293.426			293.8	3.06023			385	293.512			293.548	3.23313			385	288.021			293.554	3.41902			385	291.179			293.293	2.97264			385	293.274			293.836	2.96719
		385.5	292.12			293.619	3.45866			385.5	292.497			293.801	3.06017			385.5	295.087			293.544	3.2271			385.5	291.014			293.57	3.40031			385.5	296.813			293.304	2.97801			385.5	298.106			293.845	2.95046
		386	293.481			293.598	3.47994			386	294.076			293.85	3.1193			386	286.356			293.526	3.24292			386	297.611			293.59	3.39681			386	292.959			293.292	2.98012			386	295.448			293.84	2.94669
		386.5	294.704			293.631	3.50962			386.5	293.235			293.849	3.11926			386.5	295.241			293.538	3.2478			386.5	294.591			293.55	3.39613			386.5	294.125			293.316	2.98236			386.5	295.833			293.874	2.97388
		387	298.974			293.604	3.52131			387	292.277			293.822	3.14792			387	295.641			293.514	3.25416			387	289.869			293.557	3.39922			387	295.94			293.287	2.97638			387	297.827			293.868	2.97509
		387.5	293.687			293.574	3.50101			387.5	293.659			293.866	3.18622			387.5	296.043			293.528	3.23028			387.5	295.395			293.578	3.3895			387.5	291.915			293.303	2.983			387.5	289.814			293.87	2.9748
		388	294.603			293.621	3.56566			388	294.62			293.891	3.2043			388	295.488			293.543	3.24512			388	290.343			293.606	3.42759			388	293.392			293.296	2.98276			388	299.382			293.84	2.96223
		388.5	296.353			293.571	3.62096			388.5	294.579			293.907	3.21642			388.5	292.921			293.522	3.24472			388.5	293.003			293.631	3.42164			388.5	294.914			293.269	2.98297			388.5	297.098			293.847	2.96765
		389	290.561			293.569	3.61917			389	295.785			293.895	3.21859			389	293.421			293.507	3.24002			389	294.485			293.665	3.44881			389	295.386			293.253	2.99889			389	284.299			293.837	2.96431
		389.5	295.495			293.558	3.63202			389.5	289.469			293.893	3.21773			389.5	294.662			293.488	3.23944			389.5	295.59			293.672	3.45201			389.5	299.727			293.265	3.00444			389.5	300.132			293.791	2.97466
		390	293.941			293.541	3.63079			390	298.688			293.91	3.20322			390	293.706			293.472	3.24985			390	300.607			293.675	3.45424			390	292.494			293.227	3.0314			390	289.404			293.821	2.96487
		390.5	293.972			293.565	3.64911			390.5	294.447			293.885	3.18533			390.5	292.64			293.494	3.26365			390.5	293.49			293.647	3.4204			390.5	296.336			293.223	3.02887			390.5	296.366			293.803	2.94149
		391	296.66			293.519	3.70166			391	293.565			293.85	3.21786			391	290.208			293.435	3.34732			391	296.418			293.619	3.44549			391	290.931			293.219	3.02022			391	291.387			293.772	2.93853
		391.5	291.723			293.51	3.69639			391.5	295.632			293.876	3.23666			391.5	290.832			293.45	3.35522			391.5	292.195			293.599	3.44079			391.5	297.98			293.204	3.03123			391.5	289.742			293.815	2.86158
		392	296.737			293.546	3.71274			392	290.63			293.868	3.23433			392	293.55			293.451	3.35498			392	294.886			293.584	3.45287			392	292.855			293.218	3.0525			392	300.612			293.806	2.84425
		392.5	288.481			293.489	3.74917			392.5	297.184			293.893	3.22856			392.5	293.192			293.449	3.3571			392.5	294.475			293.547	3.47959			392.5	294.193			293.201	3.07512			392.5	295.681			293.803	2.8485
		393	295.491			293.552	3.77028			393	293.944			293.882	3.22103			393	291.851			293.497	3.38734			393	295.842			293.57	3.50195			393	292.002			293.19	3.06186			393	290.203			293.822	2.87735
		393.5	291.662			293.526	3.77532			393.5	290.998			293.859	3.23671			393.5	295.001			293.466	3.41404			393.5	295.137			293.544	3.50486			393.5	292.998			293.198	3.0632			393.5	293.762			293.824	2.87596
		394	290.874			293.504	3.79808			394	297.482			293.873	3.23036			394	291.77			293.484	3.42177			394	290.958			293.52	3.51019			394	297.539			293.179	3.06893			394	289.469			293.842	2.86148
		394.5	295.049			293.554	3.82819			394.5	297.325			293.849	3.22151			394.5	296.432			293.508	3.4269			394.5	293.449			293.553	3.51726			394.5	293.662			293.206	3.08252			394.5	296.622			293.811	2.82121
		395	296.226			293.542	3.82711			395	296.414			293.789	3.26709			395	292.167			293.515	3.43194			395	292.991			293.537	3.5253			395	295.915			293.227	3.09516			395	294.499			293.801	2.81814
		395.5	289.889			293.532	3.8226			395.5	297.573			293.792	3.26959			395.5	294.864			293.569	3.48752			395.5	291.589			293.556	3.53262			395.5	293.327			293.186	3.09141			395.5	294.654			293.797	2.82332
		396	295.833			293.57	3.82398			396	286.832			293.756	3.26724			396	290.398			293.537	3.49031			396	300.713			293.552	3.53487			396	290.758			293.186	3.09131			396	296.814			293.804	2.82479
		396.5	292.195			293.545	3.82535			396.5	294.417			293.778	3.23583			396.5	297.251			293.546	3.48905			396.5	297.033			293.499	3.50702			396.5	293.291			293.175	3.08558			396.5	295.1			293.836	2.81191
		397	293.645			293.551	3.82416			397	301.621			293.78	3.23663			397	287.596			293.538	3.48784			397	293.956			293.498	3.50647			397	293.421			293.162	3.09062			397	290.796			293.806	2.81405
		397.5	292.704			293.555	3.82455			397.5	286.615			293.691	3.26627			397.5	292.768			293.56	3.48204			397.5	300.632			293.471	3.52404			397.5	287.948			293.151	3.10256			397.5	296.579			293.81	2.81561
		398	294.765			293.549	3.82661			398	296.094			293.747	3.24072			398	296.764			293.552	3.47495			398	291.111			293.441	3.48805			398	294.925			293.157	3.10391			398	291.356			293.819	2.82122
		398.5	298.413			293.531	3.82932			398.5	289.844			293.731	3.23699			398.5	289.137			293.583	3.44932			398.5	295.355			293.469	3.49221			398.5	292.461			293.153	3.10415			398.5	296.769			293.796	2.81575
		399	287.073			293.515	3.81537			399	295.309			293.751	3.22524			399	298.599			293.602	3.45494			399	296.102			293.462	3.4898			399	291.651			293.177	3.08227			399	290.883			293.804	2.82269
		399.5	296.966			293.533	3.79326			399.5	293.824			293.761	3.23303			399.5	291.974			293.603	3.45615			399.5	290.112			293.446	3.48495			399.5	289.737			293.196	3.10479			399.5	295.461			293.816	2.81509
		400	288.962			293.523	3.78669			400	290.595			293.729	3.26365			400	294.131			293.614	3.44537			400	301.273			293.453	3.47994			400	293.983			293.186	3.11067			400	288.615			293.792	2.81216
		400.5	294.645			293.536	3.77509			400.5	290.304			293.753	3.25818			400.5	292.697			293.59	3.42723			400.5	292.82			293.412	3.43552			400.5	298.065			293.213	3.12129			400.5	293.6			293.799	2.80758
		401	293.911			293.55	3.78452			401	292.193			293.762	3.25081			401	292.498			293.581	3.43373			401	290.721			293.431	3.44269			401	290.042			293.243	3.11637			401	296.004			293.766	2.81249
		401.5	290.369			293.547	3.78452			401.5	291.098			293.747	3.26608			401.5	294.282			293.577	3.43357			401.5	297.127			293.428	3.44539			401.5	299.096			293.244	3.11678			401.5	291.735			293.792	2.81009
		402	295.629			293.561	3.77785			402	294.714			293.782	3.27548			402	295.381			293.581	3.43303			402	288.074			293.428	3.44485			402	292.211			293.209	3.10195			402	291.375			293.793	2.81114
		402.5	292.774			293.566	3.78072			402.5	292.496			293.765	3.27955			402.5	293.752			293.603	3.44027			402.5	294.634			293.438	3.43202			402.5	286.519			293.233	3.09607			402.5	294.078			293.794	2.81052
		403	294.797			293.55	3.79034			403	294.588			293.763	3.28047			403	294.626			293.585	3.4459			403	298.263			293.449	3.43996			403	298.344			293.208	3.06869			403	297.528			293.816	2.82628
		403.5	290.375			293.567	3.80293			403.5	297.608			293.756	3.28007			403.5	292.734			293.587	3.44693			403.5	291.154			293.457	3.45274			403.5	292.779			293.216	3.06816			403.5	294.492			293.806	2.82204
		404	295.843			293.585	3.79632			404	296.022			293.73	3.27028			404	291.181			293.573	3.45174			404	294.248			293.447	3.46241			404	289.653			293.262	3.03641			404	298.734			293.829	2.82432
		404.5	293.862			293.557	3.8004			404.5	298.018			293.703	3.27377			404.5	298.356			293.574	3.45215			404.5	288.967			293.464	3.47417			404.5	293.938			293.214	3.03125			404.5	291.409			293.832	2.82217
		405	295.633			293.579	3.81536			405	293.755			293.689	3.26119			405	289.3			293.574	3.45233			405	291.292			293.499	3.46402			405	289.902			293.248	3.06305			405	294.52			293.819	2.82677
		405.5	293.103			293.546	3.82672			405.5	293.823			293.682	3.26236			405.5	294.641			293.573	3.45289			405.5	292.428			293.498	3.46475			405.5	291.263			293.262	3.0528			405.5	287.75			293.794	2.81591
		406	289.004			293.539	3.82878			406	294.051			293.687	3.26315			406	295.057			293.565	3.44423			406	286.039			293.519	3.4713			406	292.475			293.277	3.06246			406	295.173			293.786	2.81632
		406.5	297.894			293.559	3.81545			406.5	294.351			293.69	3.26383			406.5	296.09			293.572	3.43723			406.5	301.276			293.54	3.43801			406.5	293.863			293.315	3.06802			406.5	293.081			293.745	2.80417
		407	290.575			293.53	3.80451			407	300.38			293.689	3.26367			407	300.075			293.542	3.45441			407	291.756			293.511	3.39634			407	294.632			293.294	3.09675			407	295.548			293.76	2.79978
		407.5	295.579			293.558	3.80325			407.5	295.423			293.66	3.22953			407.5	292.333			293.538	3.45307			407.5	293.883			293.509	3.39737			407.5	290.021			293.334	3.13951			407.5	293.39			293.749	2.80118
		408	292.316			293.539	3.8023			408	293.133			293.637	3.2329			408	292.73			293.522	3.44859			408	289.65			293.49	3.40527			408	297.375			293.308	3.15686			408	292.878			293.784	2.76949
		408.5	298.184			293.524	3.81293			408.5	288.075			293.652	3.23717			408.5	298.244			293.502	3.4221			408.5	291.806			293.552	3.4473			408.5	293.345			293.322	3.16906			408.5	290.872			293.785	2.77014
		409	290.062			293.501	3.7986			409	291.648			293.686	3.21415			409	293.527			293.51	3.42125			409	293.721			293.544	3.45318			409	290.381			293.345	3.16175			409	290.954			293.768	2.78464
		409.5	292.354			293.513	3.79152			409.5	298.918			293.695	3.21093			409.5	293.337			293.512	3.42101			409.5	285.788			293.541	3.45332			409.5	292.519			293.283	3.20437			409.5	289.159			293.761	2.78195
		410	295.263			293.523	3.79104			410	294.272			293.677	3.19169			410	296.712			293.497	3.40719			410	293.272			293.579	3.40934			410	291.989			293.312	3.23029			410	295.557			293.768	2.78281
		410.5	293.395			293.503	3.79198			410.5	295.161			293.688	3.19782			410.5	298.322			293.484	3.41216			410.5	293.939			293.587	3.41073			410.5	295.259			293.309	3.23338			410.5	290.708			293.758	2.78955
		411	292.436			293.503	3.79198			411	295.267			293.683	3.19629			411	296.186			293.5	3.41886			411	290.851			293.593	3.41232			411	294.911			293.317	3.23343			411	299.358			293.784	2.78663
		411.5	297.581			293.511	3.79131			411.5	291.532			293.668	3.19614			411.5	290.515			293.485	3.41128			411.5	296.199			293.601	3.40792			411.5	296.197			293.342	3.2433			411.5	292.333			293.767	2.81501
		412	293.261			293.448	3.82864			412	292.566			293.68	3.19266			412	296.845			293.471	3.39695			412	286.678			293.589	3.40303			412	294.372			293.322	3.24432			412	287.384			293.793	2.79632
		412.5	290.871			293.432	3.83604			412.5	294.153			293.714	3.2155			412.5	295.608			293.486	3.41595			412.5	292.582			293.634	3.37083			412.5	295.056			293.336	3.25718			412.5	293.926			293.809	2.81634
		413	293.012			293.424	3.84263			413	292.456			293.729	3.22517			413	288.146			293.502	3.40948			413	295.164			293.613	3.39069			413	291.935			293.317	3.2515			413	292.858			293.806	2.82063
		413.5	297.929			293.424	3.84263			413.5	294.245			293.734	3.22398			413.5	296.193			293.493	3.40297			413.5	291.937			293.609	3.38933			413.5	292.355			293.29	3.26485			413.5	293.03			293.784	2.79421
		414	288.447			293.399	3.82949			414	294.596			293.708	3.24107			414	286.136			293.492	3.40229			414	293.544			293.616	3.38737			414	298.035			293.301	3.27457			414	292.635			293.781	2.79607
		414.5	296.913			293.414	3.81574			414.5	293.919			293.69	3.24634			414.5	296.902			293.493	3.39984			414.5	292.515			293.596	3.39908			414.5	293.351			293.288	3.28551			414.5	290.888			293.778	2.80297
		415	294.261			293.398	3.8077			415	294.926			293.671	3.25547			415	289.364			293.513	3.42705			415	291.507			293.62	3.40822			415	292.596			293.3	3.28644			415	293.903			293.782	2.80381
		415.5	290.012			293.42	3.82512			415.5	294.486			293.678	3.25925			415.5	290.526			293.528	3.40096			415.5	287.879			293.628	3.40505			415.5	293.647			293.3	3.28696			415.5	294.636			293.773	2.8094
		416	297.27			293.434	3.81767			416	292.444			293.667	3.25993			416	290.947			293.505	3.39372			416	292.026			293.648	3.38309			416	293.328			293.292	3.28879			416	296.585			293.774	2.80933
		416.5	294.401			293.405	3.81056			416.5	295.06			293.665	3.26109			416.5	293.729			293.533	3.3827			416.5	298.581			293.645	3.38487			416.5	297.192			293.325	3.3156			416.5	293.091			293.774	2.80904
		417	292.582			293.384	3.81669			417	292.159			293.669	3.26331			417	297.35			293.526	3.39082			417	290.009			293.598	3.38184			417	291.373			293.294	3.34258			417	294.532			293.776	2.80733
		417.5	295.349			293.401	3.82081			417.5	288.817			293.681	3.26221			417.5	286.473			293.583	3.44277			417.5	294.948			293.619	3.37255			417.5	288.598			293.277	3.35099			417.5	293.101			293.801	2.83068
		418	290.119			293.384	3.81967			418	292.446			293.694	3.24764			418	295.523			293.561	3.45563			418	293.657			293.618	3.37214			418	294.778			293.26	3.33966			418	295.015			293.798	2.83011
		418.5	296.604			293.375	3.82967			418.5	293.648			293.709	3.24867			418.5	288.973			293.543	3.4452			418.5	296.625			293.607	3.37561			418.5	292.435			293.275	3.33817			418.5	294.567			293.803	2.83603
		419	296.415			293.371	3.82691			419	294.78			293.715	3.24955			419	291.282			293.59	3.41243			419	295.211			293.607	3.37569			419	298.771			293.294	3.32249			419	294.588			293.825	2.84714
		419.5	290.33			293.376	3.83076			419.5	292.796			293.71	3.24868			419.5	293.705			293.561	3.41994			419.5	298.974			293.584	3.38005			419.5	293.702			293.291	3.32156			419.5	296.742			293.792	2.87675
		420	295.335			293.386	3.82534			420	292.472			293.702	3.2526			420	295.097			293.593	3.40689			420	294.802			293.577	3.37039			420	291.127			293.277	3.33134			420	296.672			293.801	2.87743
		420.5	299.151			293.364	3.82676			420.5	297.14			293.724	3.25844			420.5	292.827			293.6	3.40381			420.5	289.299			293.557	3.37494			420.5	295.677			293.253	3.30889			420.5	290.56			293.796	2.87616
		421	290.78			293.351	3.81188			421	293.198			293.691	3.25699			421	297.779			293.551	3.47138			421	292.161			293.562	3.36921			421	287.305			293.256	3.30951			421	296.011			293.787	2.8766
		421.5	294.806			293.367	3.80768			421.5	289.081			293.68	3.26228			421.5	293.366			293.586	3.52179			421.5	290.06			293.582	3.37216			421.5	292.535			293.255	3.30976			421.5	296.897			293.794	2.88015
		422	290.974			293.361	3.80639			422	290.105			293.744	3.29767			422	294.024			293.565	3.53886			422	295.905			293.6	3.36293			422	291.278			293.24	3.3056			422	293.554			293.745	2.91202
		422.5	297.815			293.376	3.80282			422.5	294.265			293.725	3.3294			422.5	291.781			293.524	3.5378			422.5	296.976			293.604	3.36584			422.5	294.279			293.262	3.28059			422.5	295.484			293.733	2.90484
		423	299.932			293.333	3.80094			423	292.448			293.756	3.36259			423	297.564			293.563	3.58093			423	288.358			293.598	3.36076			423	295.161			293.26	3.28121			423	296.338			293.746	2.89639
		423.5	296.069			293.312	3.77582			423.5	298.103			293.743	3.37295			423.5	291.397			293.516	3.63858			423.5	294.767			293.636	3.34493			423.5	290.396			293.265	3.27881			423.5	298.604			293.738	2.89218
		424	300.323			293.319	3.78233			424	288.842			293.742	3.37209			424	298.037			293.531	3.63788			424	290.329			293.628	3.34424			424	297.715			293.256	3.27849			424	296.783			293.721	2.88354
		424.5	297.761			293.26	3.76441			424.5	292.623			293.758	3.35633			424.5	291.875			293.513	3.62677			424.5	292.258			293.632	3.34059			424.5	289.487			293.245	3.2758			424.5	296.256			293.726	2.88411
		425	293.705			293.261	3.76526			425	297.216			293.764	3.35537			425	298.801			293.51	3.62901			425	292.857			293.609	3.36612			425	290.162			293.252	3.27143			425	290.59			293.705	2.88641
		425.5	292.36			293.243	3.77185			425.5	293.642			293.733	3.3517			425.5	291.51			293.507	3.62521			425.5	285.357			293.653	3.41433			425.5	294.886			293.227	3.25631			425.5	296.756			293.677	2.88757
		426	292.75			293.248	3.77135			426	294.241			293.714	3.36299			426	292.394			293.498	3.63121			426	295.633			293.664	3.39188			426	286.798			293.289	3.30274			426	294.309			293.63	2.88498
		426.5	297.068			293.24	3.77409			426.5	297.705			293.726	3.36889			426.5	291.595			293.475	3.612			426.5	289.508			293.647	3.39047			426.5	300.189			293.285	3.30688			426.5	292.129			293.628	2.88307
		427	296.103			293.233	3.768			427	289.817			293.716	3.35981			427	294.102			293.47	3.61515			427	297.89			293.677	3.38035			427	292.99			293.276	3.30496			427	292.291			293.603	2.88149
		427.5	291.234			293.256	3.7991			427.5	296.514			293.716	3.35902			427.5	290.077			293.463	3.61887			427.5	293.826			293.624	3.39641			427.5	291.104			293.299	3.27564			427.5	289.512			293.636	2.8842
		428	296.042			293.267	3.79642			428	294.673			293.708	3.35409			428	295.782			293.481	3.61863			428	293.111			293.645	3.41035			428	299.894			293.282	3.24832			428	298.345			293.65	2.9065
		428.5	294.933			293.245	3.7931			428.5	289.881			293.703	3.35339			428.5	291.161			293.463	3.62432			428.5	298.66			293.654	3.41124			428.5	293.024			293.285	3.24835			428.5	289.866			293.628	2.91829
		429	289.675			293.244	3.79298			429	289.626			293.712	3.34546			429	290.576			293.481	3.6164			429	290.861			293.626	3.393			429	289.231			293.312	3.25291			429	291.181			293.627	2.91893
		429.5	296.299			293.265	3.78483			429.5	296.921			293.773	3.38296			429.5	292.177			293.471	3.61277			429.5	294.072			293.649	3.38981			429.5	297.713			293.301	3.23449			429.5	290.048			293.638	2.91804
		430	297.378			293.248	3.77883			430	286.448			293.726	3.40572			430	290.977			293.467	3.61618			430	291.941			293.631	3.39644			430	286.253			293.296	3.23563			430	296.69			293.648	2.90703
		430.5	291.014			293.236	3.76924			430.5	296.761			293.785	3.38135			430.5	297.142			293.49	3.61263			430.5	293.361			293.664	3.412			430.5	297.031			293.325	3.22501			430.5	296.302			293.643	2.89966
		431	295.064			293.265	3.77482			431	290.624			293.756	3.3807			431	296.252			293.488	3.61343			431	294.418			293.649	3.42044			431	293.546			293.317	3.21606			431	290.522			293.658	2.88782
		431.5	287.214			293.248	3.77428			431.5	298.918			293.766	3.37417			431.5	289.979			293.497	3.60938			431.5	295.677			293.634	3.42372			431.5	290.14			293.331	3.19103			431.5	293.186			293.675	2.8831
		432	295.378			293.284	3.75076			432	292.397			293.758	3.3636			432	295.939			293.485	3.60113			432	290.452			293.625	3.42071			432	297.295			293.321	3.18211			432	293.373			293.71	2.8816
		432.5	298.232			293.288	3.75314			432.5	288.396			293.762	3.36249			432.5	296.509			293.461	3.59866			432.5	300.605			293.63	3.41681			432.5	286.134			293.328	3.18426			432.5	295.938			293.701	2.87532
		433	288.288			293.257	3.7375			433	301.305			293.827	3.38504			433	292.798			293.489	3.59299			433	290.05			293.584	3.38479			433	292.243			293.351	3.17788			433	297.414			293.716	2.89659
		433.5	294.308			293.325	3.77009			433.5	290.765			293.77	3.35472			433.5	301.742			293.479	3.58891			433.5	296.265			293.607	3.37639			433.5	297.905			293.342	3.16922			433.5	294.26			293.727	2.88864
		434	292.69			293.312	3.77118			434	296.332			293.801	3.35541			434	292.782			293.464	3.58248			434	294.781			293.558	3.40916			434	296.674			293.353	3.14695			434	291.739			293.71	2.90192
		434.5	292.1			293.351	3.80463			434.5	297.802			293.798	3.35349			434.5	295.583			293.493	3.60101			434.5	291.505			293.57	3.41795			434.5	297.247			293.329	3.17423			434.5	295.307			293.729	2.91248
		435	296.006			293.354	3.80389			435	291.2			293.772	3.34253			435	300.605			293.45	3.55331			435	295.378			293.587	3.41618			435	290.99			293.33	3.17543			435	296.528			293.678	2.96247
		435.5	294.407			293.344	3.79958			435.5	295.897			293.767	3.34673			435.5	290.692			293.457	3.55336			435.5	290.024			293.568	3.41696			435.5	296.677			293.297	3.17468			435.5	295.06			293.678	2.9625
		436	294.822			293.342	3.79903			436	291.148			293.755	3.34341			436	300.74			293.448	3.55025			436	290.648			293.594	3.41005			436	296.833			293.291	3.16775			436	290.955			293.671	2.96288
		436.5	291.091			293.338	3.79788			436.5	296.281			293.77	3.33836			436.5	294.022			293.412	3.51383			436.5	300.682			293.589	3.41567			436.5	289.615			293.307	3.16419			436.5	293.044			293.665	2.96777
		437	298.645			293.339	3.79699			437	297.475			293.763	3.33468			437	287.662			293.443	3.51805			437	291.336			293.561	3.38031			437	294.356			293.267	3.17137			437	292.695			293.702	3.03311
		437.5	290.076			293.334	3.79083			437.5	290.082			293.743	3.32431			437.5	297.368			293.384	3.49478			437.5	295.87			293.563	3.37929			437.5	298.805			293.264	3.16797			437.5	292.938			293.696	3.02883
		438	292.883			293.357	3.78487			438	296.194			293.779	3.32295			438	291.872			293.389	3.49645			438	293.118			293.55	3.37542			438	290.321			293.262	3.16999			438	290.9			293.664	3.04832
		438.5	287.15			293.37	3.78776			438.5	289.716			293.775	3.3205			438.5	292.903			293.429	3.47647			438.5	294.749			293.548	3.37564			438.5	294.885			293.274	3.1781			438.5	297.973			293.673	3.0431
		439	295.708			293.405	3.76231			439	298.374			293.8	3.30875			439	295.78			293.406	3.46555			439	300.298			293.534	3.37675			439	293.396			293.267	3.16846			439	289.507			293.659	3.0523
		439.5	299.807			293.388	3.75955			439.5	296.133			293.785	3.29483			439.5	290.561			293.426	3.46806			439.5	294.057			293.509	3.3452			439.5	290.993			293.284	3.16163			439.5	296.373			293.651	3.05682
		440	293.117			293.351	3.73256			440	291.634			293.764	3.29343			440	298.539			293.42	3.47003			440	290.147			293.497	3.34787			440	291.318			293.293	3.16887			440	293.742			293.681	3.07877
		440.5	293.969			293.339	3.73723			440.5	297.476			293.792	3.29902			440.5	292.698			293.413	3.46661			440.5	299.198			293.515	3.33953			440.5	294.512			293.271	3.18241			440.5	295.67			293.711	3.08109
		441	294.198			293.296	3.77941			441	287.506			293.763	3.29163			441	292.555			293.454	3.48169			441	286.409			293.5	3.32018			441	293.859			293.291	3.18022			441	292.286			293.689	3.06624
		441.5	295.639			293.303	3.78241			441.5	290.948			293.818	3.278			441.5	298.554			293.39	3.50474			441.5	290.616			293.553	3.292			441.5	294.231			293.319	3.18834			441.5	292.807			293.719	3.05465
		442	294.024			293.274	3.78626			442	298.365			293.83	3.2719			442	286.793			293.424	3.53105			442	297.618			293.558	3.28846			442	292.314			293.311	3.18737			442	293.567			293.704	3.04907
		442.5	292.419			293.299	3.80705			442.5	292.651			293.801	3.25721			442.5	295.647			293.407	3.54378			442.5	288.643			293.555	3.2849			442.5	295.417			293.322	3.19261			442.5	294.484			293.708	3.0497
		443	296.483			293.312	3.8085			443	294.384			293.814	3.25805			443	291.997			293.398	3.5332			443	296.263			293.555	3.284			443	290.863			293.331	3.19841			443	289.751			293.704	3.04773
		443.5	296.28			293.292	3.80233			443.5	293.172			293.774	3.30167			443.5	294.955			293.441	3.50474			443.5	292.524			293.547	3.27933			443.5	293.888			293.358	3.21181			443.5	297.906			293.68	3.07694
		444	290.215			293.289	3.80023			444	290.405			293.785	3.30339			444	292.712			293.425	3.50203			444	294.426			293.548	3.27916			444	299.012			293.341	3.20986			444	292.964			293.699	3.08284
		444.5	300.977			293.308	3.79442			444.5	295.326			293.768	3.32976			444.5	290.268			293.438	3.50178			444.5	293.462			293.534	3.28131			444.5	292.266			293.36	3.20631			444.5	290.901			293.682	3.09246
		445	290.232			293.244	3.77286			445	293.933			293.729	3.35731			445	299.806			293.441	3.50314			445	287.444			293.537	3.28143			445	292.639			293.391	3.24143			445	293.475			293.673	3.09277
		445.5	292.102			293.259	3.76682			445.5	289.138			293.763	3.39475			445.5	283.897			293.423	3.51678			445.5	298.217			293.546	3.26608			445.5	291.424			293.348	3.22312			445.5	289.201			293.698	3.08103
		446	298.62			293.265	3.76597			446	296.571			293.76	3.39962			446	293.915			293.447	3.51171			446	293.722			293.528	3.2501			446	298.593			293.379	3.24194			446	293.548			293.668	3.06879
		446.5	289.948			293.265	3.76554			446.5	297.913			293.742	3.3942			446.5	293.556			293.401	3.48805			446.5	288.624			293.535	3.25175			446.5	297.986			293.379	3.24205			446.5	292.36			293.7	3.09342
		447	290.898			293.268	3.76297			447	298.311			293.728	3.38267			447	291.171			293.452	3.42272			447	298.518			293.538	3.24699			447	290.637			293.37	3.2495			447	292.388			293.69	3.10565
		447.5	293.635			293.294	3.76437			447.5	295.396			293.683	3.38082			447.5	295.661			293.428	3.43668			447.5	292.385			293.509	3.2283			447.5	293.449			293.342	3.22848			447.5	297.396			293.692	3.10564
		448	290.252			293.293	3.76429			448	295.912			293.684	3.38141			448	293.838			293.42	3.43843			448	292.833			293.516	3.22736			448	295.399			293.335	3.22009			448	292.561			293.739	3.1096
		448.5	296.381			293.288	3.76838			448.5	295.137			293.652	3.39068			448.5	293.69			293.411	3.44668			448.5	295.357			293.513	3.22836			448.5	291.018			293.329	3.2267			448.5	295.058			293.731	3.11245
		449	295.081			293.285	3.76596			449	293.363			293.645	3.38905			449	295.974			293.393	3.44432			449	288.135			293.505	3.22581			449	293.644			293.361	3.26086			449	292.719			293.756	3.12207
		449.5	289.185			293.279	3.76398			449.5	297.539			293.639	3.39044			449.5	294.252			293.397	3.44525			449.5	297.027			293.51	3.21865			449.5	289.782			293.33	3.27074			449.5	292.597			293.78	3.12968
		450	296.43			293.281	3.76137			450	295.956			293.614	3.37991			450	296.037			293.382	3.45026			450	292.077			293.495	3.20918			450	288.127			293.371	3.29226			450	294.622			293.739	3.13593
		450.5	286.937			293.287	3.76789			450.5	286.641			293.629	3.39648			450.5	291.169			293.369	3.44536			450.5	296.178			293.484	3.21764			450.5	296.48			293.371	3.2923			450.5	292.217			293.758	3.14004
		451	294.775			293.286	3.77027			451	298.459			293.657	3.36152			451	293.222			293.355	3.44722			451	294.25			293.491	3.22547			451	289.612			293.384	3.28321			451	287.897			293.738	3.14438
		451.5	286.158			293.294	3.77487			451.5	296.646			293.662	3.36959			451.5	295.921			293.347	3.44274			451.5	288.661			293.487	3.22503			451.5	295.433			293.434	3.27896			451.5	296.746			293.739	3.14393
		452	289.503			293.343	3.74576			452	294.317			293.635	3.36739			452	291.15			293.347	3.44282			452	293.325			293.484	3.2297			452	300.837			293.404	3.27831			452	296.172			293.759	3.14946
		452.5	295.283			293.336	3.7543			452.5	295.977			293.646	3.37259			452.5	296.597			293.348	3.44283			452.5	292.761			293.512	3.25317			452.5	288.089			293.444	3.28051			452.5	289.855			293.759	3.14931
		453	286.563			293.363	3.78771			453	292.061			293.642	3.37037			453	290.683			293.354	3.44797			453	294.355			293.494	3.26714			453	291.055			293.434	3.27748			453	294.931			293.771	3.14809
		453.5	291.305			293.382	3.76305			453.5	290.837			293.657	3.36992			453.5	293.232			293.378	3.44937			453.5	296.605			293.465	3.28531			453.5	292.979			293.401	3.23573			453.5	289.591			293.795	3.12143
		454	292.861			293.382	3.76285			454	288.031			293.689	3.37364			454	296.022			293.368	3.44286			454	292.564			293.483	3.31187			454	294.735			293.436	3.21588			454	295.069			293.757	3.13123
		454.5	290.64			293.402	3.77064			454.5	293.412			293.713	3.35025			454.5	291.847			293.398	3.44526			454.5	295.459			293.467	3.32401			454.5	293.81			293.448	3.21144			454.5	293.278			293.774	3.1534
		455	293.97			293.387	3.78841			455	294.047			293.737	3.36547			455	293.392			293.431	3.47564			455	291.952			293.48	3.33689			455	290.348			293.451	3.21127			455	293.962			293.775	3.1527
		455.5	291.224			293.375	3.79021			455.5	294.916			293.743	3.36735			455.5	293.248			293.423	3.47148			455.5	290.453			293.481	3.33672			455.5	291.587			293.423	3.22427			455.5	294.343			293.772	3.15184
		456	292.725			293.391	3.788			456	300.609			293.716	3.38007			456	293.032			293.435	3.47036			456	298.874			293.474	3.34405			456	290.724			293.435	3.23012			456	290.726			293.809	3.14658
		456.5	289.484			293.4	3.78838			456.5	288.582			293.705	3.36132			456.5	290.538			293.419	3.47876			456.5	292.429			293.454	3.32338			456.5	291.031			293.461	3.22609			456.5	294.71			293.796	3.14694
		457	295.157			293.437	3.78633			457	298.631			293.711	3.35354			457	288.867			293.406	3.48374			457	296.94			293.441	3.33241			457	289.119			293.487	3.23277			457	291.389			293.802	3.14712
		457.5	298.064			293.411	3.79205			457.5	294.907			293.67	3.34363			457.5	294.783			293.4	3.48556			457.5	297.545			293.433	3.3262			457.5	296.396			293.504	3.22707			457.5	294.779			293.808	3.14895
		458	296.988			293.391	3.77792			458	289.72			293.662	3.34254			458	295.084			293.437	3.4952			458	287.506			293.417	3.31396			458	292.432			293.522	3.22326			458	298.005			293.807	3.14876
		458.5	292.183			293.37	3.76948			458.5	294.698			293.673	3.33341			458.5	292.321			293.483	3.49519			458.5	292.083			293.429	3.29642			458.5	294.431			293.533	3.21158			458.5	292.821			293.821	3.14124
		459	293.039			293.354	3.78166			459	293.291			293.696	3.35769			459	291.099			293.456	3.50677			459	292.089			293.456	3.30696			459	293.959			293.531	3.20959			459	297.834			293.806	3.14421
		459.5	292.579			293.371	3.7876			459.5	290.948			293.676	3.37245			459.5	296.723			293.452	3.50541			459.5	289.053			293.472	3.30839			459.5	291.222			293.556	3.22128			459.5	294			293.823	3.14039
		460	297.465			293.389	3.79283			460	295.136			293.674	3.37457			460	295.808			293.463	3.50525			460	299.617			293.483	3.29719			460	295.726			293.509	3.27699			460	291.387			293.842	3.15694
		460.5	292.604			293.379	3.78467			460.5	293.218			293.655	3.37651			460.5	294.851			293.497	3.51585			460.5	289.932			293.467	3.27487			460.5	291.738			293.509	3.277			460.5	301.144			293.781	3.19329
		461	294.107			293.383	3.78428			461	289.935			293.642	3.38395			461	294.974			293.459	3.52223			461	293.198			293.448	3.30609			461	294.131			293.517	3.27358			461	296.334			293.79	3.19321
		461.5	292.191			293.36	3.79455			461.5	291.345			293.678	3.38367			461.5	285.138			293.472	3.53551			461.5	299.705			293.474	3.32464			461.5	294.049			293.501	3.27033			461.5	289.899			293.745	3.20043
		462	289.908			293.365	3.79366			462	294.441			293.686	3.38026			462	292.603			293.45	3.54072			462	289.183			293.439	3.29583			462	288.644			293.525	3.27482			462	297.487			293.727	3.20913
		462.5	298.889			293.352	3.81061			462.5	295.923			293.665	3.38803			462.5	294.75			293.44	3.5392			462.5	299.935			293.456	3.28243			462.5	293.658			293.516	3.27581			462.5	290.674			293.756	3.21454
		463	291			293.304	3.80068			463	300.027			293.664	3.38748			463	293.105			293.473	3.49179			463	294.875			293.439	3.25729			463	286.98			293.522	3.27819			463	296.662			293.693	3.19374
		463.5	297.209			293.341	3.81436			463.5	293.123			293.617	3.36415			463.5	293.151			293.471	3.49238			463.5	289.201			293.432	3.2557			463.5	293.816			293.565	3.27058			463.5	290.381			293.699	3.20031
		464	294.06			293.302	3.81484			464	295.996			293.618	3.36404			464	298.671			293.458	3.49268			464	298.866			293.453	3.24185			464	294.109			293.544	3.28397			464	296.504			293.692	3.20984
		464.5	284.014			293.298	3.81446			464.5	291.165			293.606	3.35984			464.5	292.597			293.487	3.51497			464.5	296.069			293.423	3.2194			464.5	293.312			293.576	3.25088			464.5	297.146			293.673	3.19855
		465	302.958			293.333	3.76079			465	297.438			293.62	3.35555			465	295.976			293.484	3.51566			465	296.473			293.434	3.23358			465	296.398			293.576	3.25093			465	291.435			293.694	3.19233
		465.5	291.403			293.3	3.70452			465.5	296.574			293.596	3.34547			465.5	288.498			293.446	3.50045			465.5	294.738			293.428	3.22874			465.5	293.862			293.548	3.27024			465.5	295.423			293.662	3.19419
		466	295.56			293.321	3.706			466	289.027			293.577	3.33924			466	292.588			293.482	3.5281			466	291.806			293.432	3.23117			466	295.038			293.542	3.27184			466	294.083			293.688	3.18892
		466.5	294.912			293.313	3.70291			466.5	293.034			293.592	3.32533			466.5	290.65			293.485	3.53042			466.5	289.079			293.432	3.23118			466.5	297.527			293.521	3.26715			466.5	297.745			293.673	3.18276
		467	285.464			293.311	3.70202			467	292.337			293.597	3.32518			467	291.201			293.504	3.51355			467	296.648			293.44	3.22256			467	293.002			293.518	3.26708			467	288.309			293.636	3.18468
		467.5	295.734			293.323	3.681			467.5	291.585			293.602	3.32404			467.5	293.272			293.518	3.51516			467.5	296.139			293.43	3.21558			467.5	293.687			293.513	3.2655			467.5	295.795			293.633	3.18695
		468	290.169			293.288	3.69138			468	292.942			293.61	3.32103			468	292.278			293.528	3.50969			468	294.475			293.427	3.21347			468	288.045			293.484	3.25535			468	294.739			293.613	3.1889
		468.5	290.819			293.298	3.68552			468.5	291.822			293.631	3.3304			468.5	292.717			293.53	3.50848			468.5	297.691			293.423	3.21264			468.5	292.904			293.493	3.25627			468.5	290.886			293.6	3.1918
		469	298.425			293.309	3.68139			469	294.351			293.637	3.32835			469	292.58			293.534	3.50857			469	290.254			293.399	3.19863			469	296.486			293.5	3.25835			469	298.57			293.601	3.19273
		469.5	290.599			293.264	3.67345			469.5	298.386			293.659	3.34752			469.5	291.306			293.52	3.51917			469.5	295.001			293.382	3.22385			469.5	294.034			293.531	3.23564			469.5	293.852			293.614	3.17594
		470	293.346			293.305	3.68872			470	294.065			293.632	3.33091			470	298.852			293.546	3.53332			470	292.972			293.396	3.23762			470	293.432			293.546	3.24039			470	295.922			293.609	3.17313
		470.5	294.636			293.286	3.69752			470.5	292.626			293.651	3.34369			470.5	287.154			293.555	3.53309			470.5	288.461			293.399	3.2375			470.5	290.065			293.534	3.23391			470.5	292.442			293.594	3.17475
		471	285.881			293.28	3.69628			471	294.224			293.65	3.34414			471	293.139			293.596	3.55514			471	294.05			293.423	3.21856			471	288.991			293.499	3.26659			471	292.854			293.623	3.17586
		471.5	297.563			293.318	3.6589			471.5	294.922			293.648	3.34392			471.5	295.114			293.57	3.53556			471.5	292.272			293.424	3.21897			471.5	296.375			293.504	3.26726			471.5	293.429			293.619	3.17114
		472	293.722			293.266	3.67337			472	293.616			293.639	3.34288			472	294.784			293.593	3.5084			472	291.539			293.414	3.22595			472	292.44			293.514	3.25984			472	295.771			293.608	3.17439
		472.5	285.438			293.279	3.67959			472.5	291.211			293.644	3.34373			472.5	292.142			293.624	3.53196			472.5	296.19			293.404	3.23465			472.5	298.045			293.527	3.24727			472.5	296.764			293.597	3.17017
		473	296.936			293.301	3.64492			473	295.358			293.642	3.34588			473	297.148			293.588	3.55503			473	293.581			293.403	3.2332			473	291.397			293.502	3.24456			473	296.564			293.591	3.17391
		473.5	291.169			293.283	3.63581			473.5	291.965			293.636	3.34401			473.5	293.042			293.609	3.57586			473.5	295.429			293.392	3.23586			473.5	293.126			293.503	3.24408			473.5	294.455			293.586	3.17559
		474	292.426			293.318	3.64962			474	293.732			293.663	3.35165			474	299.907			293.64	3.58998			474	290.273			293.379	3.23294			474	296.69			293.504	3.24464			474	294.939			293.599	3.18024
		474.5	293.78			293.304	3.65873			474.5	292.98			293.682	3.3627			474.5	294.409			293.648	3.59851			474.5	298.076			293.397	3.22568			474.5	288.302			293.506	3.24337			474.5	291.367			293.568	3.18925
		475	290.554			293.296	3.65927			475	295.177			293.66	3.38119			475	294.302			293.666	3.60527			475	290.499			293.371	3.20896			475	292.423			293.488	3.25507			475	296.82			293.574	3.19619
		475.5	298.877			293.326	3.66134			475.5	295.414			293.672	3.39051			475.5	294.542			293.621	3.58334			475.5	299.083			293.395	3.20587			475.5	295.64			293.482	3.24996			475.5	291.992			293.561	3.18931
		476	284.231			293.288	3.64337			476	287.677			293.667	3.38872			476	284.749			293.602	3.58934			476	291.169			293.354	3.18576			476	289.345			293.49	3.23834			476	290.887			293.552	3.1893
		476.5	295.613			293.35	3.59483			476.5	292.634			293.7	3.36227			476.5	299.344			293.612	3.59352			476.5	294.567			293.368	3.18226			476.5	293.21			293.504	3.23959			476.5	295.614			293.583	3.23227
		477	290.248			293.316	3.60638			477	295.277			293.716	3.36462			477	291.801			293.611	3.5934			477	294.94			293.349	3.18629			477	291.298			293.489	3.23653			477	290.142			293.562	3.2613
		477.5	292.737			293.33	3.59984			477.5	294.728			293.685	3.37794			477.5	290.643			293.659	3.53847			477.5	292.405			293.33	3.18785			477.5	291.851			293.512	3.22326			477.5	297.505			293.531	3.25974
		478	290.272			293.347	3.60461			478	295.339			293.682	3.3773			478	298.086			293.637	3.51673			478	288.811			293.333	3.18734			478	290.627			293.502	3.22704			478	294.388			293.54	3.25802
		478.5	293.108			293.354	3.59994			478.5	293.004			293.675	3.3753			478.5	290.891			293.625	3.52755			478.5	297.707			293.356	3.1712			478.5	289.866			293.52	3.22478			478.5	289.584			293.554	3.25259
		479	289.971			293.372	3.60821			479	292.345			293.674	3.37549			479	296.653			293.627	3.52585			479	289.831			293.302	3.18876			479	293.649			293.519	3.2252			479	295.184			293.556	3.25456
		479.5	293.192			293.365	3.61568			479.5	287.398			293.688	3.37581			479.5	294.342			293.623	3.52086			479.5	298.365			293.332	3.18405			479.5	295.206			293.54	3.21989			479.5	295.09			293.542	3.27511
		480	293.715			293.374	3.61713			480	297.362			293.717	3.3465			480	292.274			293.637	3.51555			480	294.124			293.298	3.16628			480	290.733			293.554	3.21008			480	290.935			293.544	3.27662
		480.5	293.591			293.383	3.62036			480.5	290.101			293.675	3.35267			480.5	292.023			293.607	3.51605			480.5	292.614			293.29	3.16637			480.5	290.804			293.564	3.21375			480.5	299.171			293.544	3.27659
		481	295.167			293.338	3.67351			481	294.066			293.706	3.34792			481	293.006			293.592	3.51908			481	294.144			293.304	3.1697			481	296.552			293.534	3.22697			481	285.39			293.543	3.27693
		481.5	293.088			293.348	3.68126			481.5	294.08			293.673	3.37786			481.5	294.388			293.605	3.51904			481.5	292.533			293.288	3.17361			481.5	289.403			293.542	3.22195			481.5	296.804			293.528	3.2765
		482	289.986			293.35	3.68124			482	292.561			293.651	3.38919			482	296.662			293.603	3.52			482	291.957			293.294	3.17334			482	294.951			293.565	3.2187			482	293.6			293.515	3.27528
		482.5	297.124			293.356	3.67667			482.5	296.943			293.653	3.38859			482.5	285.486			293.599	3.52103			482.5	293.15			293.325	3.19132			482.5	294.011			293.537	3.21672			482.5	293.204			293.52	3.27238
		483	297.942			293.336	3.66705			483	287.24			293.621	3.3881			483	296.016			293.619	3.53606			483	290.093			293.3	3.21271			483	292.612			293.57	3.20847			483	295.777			293.507	3.2551
		483.5	296.227			293.333	3.66361			483.5	297.047			293.651	3.35792			483.5	286.256			293.565	3.57105			483.5	289.727			293.325	3.20723			483.5	293.227			293.561	3.20716			483.5	289.138			293.52	3.22661
		484	298.753			293.336	3.66604			484	292.642			293.649	3.35633			484	295.452			293.625	3.53519			484	296.709			293.334	3.19998			484	294.811			293.552	3.20847			484	296.047			293.518	3.22431
		484.5	289.259			293.307	3.64597			484.5	295.373			293.635	3.36666			484.5	297.707			293.644	3.55816			484.5	294.471			293.321	3.19153			484.5	295.874			293.575	3.21777			484.5	299.617			293.543	3.24499
		485	302.441			293.325	3.63474			485	293.438			293.654	3.38778			485	288.91			293.657	3.53589			485	295.155			293.333	3.20073			485	291.601			293.559	3.22668			485	292.67			293.522	3.26205
		485.5	299.339			293.288	3.57911			485.5	293.529			293.655	3.38775			485.5	296.047			293.701	3.61522			485.5	291.287			293.324	3.19812			485.5	295.984			293.551	3.22566			485.5	293.753			293.522	3.26216
		486	287.974			293.258	3.55332			486	302.477			293.65	3.38848			486	290.253			293.655	3.6237			486	294.935			293.365	3.22448			486	291.02			293.551	3.22567			486	292.083			293.557	3.25306
		486.5	300.057			293.309	3.54987			486.5	293.833			293.601	3.33094			486.5	289.007			293.682	3.60839			486.5	289.646			293.351	3.22364			486.5	296.124			293.522	3.26835			486.5	296.843			293.536	3.25055
		487	289.421			293.26	3.52372			487	287.812			293.578	3.3461			487	298.238			293.671	3.60451			487	295.851			293.368	3.21304			487	292.666			293.527	3.2729			487	293.844			293.51	3.22236
		487.5	292.886			293.271	3.51521			487.5	300.984			293.626	3.333			487.5	291.551			293.68	3.59814			487.5	294.258			293.38	3.22752			487.5	290.579			293.568	3.29344			487.5	288.486			293.5	3.22826
		488	303.156			293.283	3.51825			488	298.69			293.609	3.30356			488	292.964			293.72	3.59013			488	301.021			293.359	3.2351			488	288.693			293.566	3.29211			488	295.884			293.513	3.23521
		488.5	284.624			293.211	3.46292			488.5	297.909			293.582	3.28394			488.5	291.707			293.699	3.57594			488.5	295.224			293.338	3.19815			488.5	295.843			293.572	3.29154			488.5	295.656			293.526	3.23459
		489	295.839			293.274	3.42063			489	292.098			293.569	3.27166			489	289.763			293.701	3.57492			489	299.791			293.311	3.20555			489	287.302			293.578	3.28737			489	291.054			293.5	3.22872
		489.5	288.305			293.248	3.42075			489.5	295.467			293.544	3.30152			489.5	297.724			293.701	3.57485			489.5	295.925			293.299	3.18673			489.5	294.489			293.592	3.27202			489.5	292.848			293.494	3.22924
		490	292.135			293.266	3.40411			490	292.899			293.547	3.30365			490	282.878			293.713	3.57215			490	296.271			293.291	3.18191			490	298.866			293.585	3.26847			490	298.304			293.524	3.21025
		490.5	298.733			293.277	3.40394			490.5	293.576			293.54	3.30635			490.5	296.706			293.703	3.5865			490.5	294.972			293.279	3.17523			490.5	289.491			293.59	3.25958			490.5	288.885			293.499	3.21062
		491	284.742			293.237	3.38629			491	287.387			293.532	3.30827			491	292.872			293.702	3.58548			491	287.761			293.267	3.17336			491	299.181			293.607	3.2745			491	300.102			293.482	3.20823
		491.5	294.961			293.288	3.33416			491.5	298.798			293.588	3.29782			491.5	289.794			293.749	3.50376			491.5	292.416			293.299	3.14999			491.5	287.472			293.596	3.25977			491.5	291.742			293.498	3.20405
		492	298.771			293.255	3.35052			492	294.151			293.555	3.27852			492	300.385			293.758	3.51412			492	289.279			293.299	3.15012			492	295.768			293.6	3.25497			492	293.491			293.467	3.24073
		492.5	285.472			293.222	3.3284			492.5	295.643			293.555	3.27862			492.5	287.455			293.745	3.52264			492.5	287.337			293.324	3.13789			492.5	294.519			293.561	3.23496			492.5	294.356			293.466	3.23948
		493	301.08			293.291	3.31065			493	294.966			293.555	3.27825			493	296.738			293.765	3.51149			493	299.221			293.335	3.11969			493	290.354			293.598	3.20772			493	293.581			293.466	3.23943
		493.5	290.159			293.252	3.26428			493.5	289.37			293.554	3.27813			493.5	296.617			293.747	3.48647			493.5	290.508			293.301	3.09239			493.5	297.451			293.581	3.20535			493.5	289.466			293.43	3.20542
		494	287.359			293.29	3.27283			494	293.802			293.59	3.27185			494	296.534			293.764	3.46327			494	290.36			293.34	3.10582			494	297.173			293.549	3.22841			494	295.089			293.454	3.211
		494.5	300.807			293.338	3.25689			494.5	292.559			293.587	3.27199			494.5	302.489			293.767	3.46548			494.5	297.609			293.323	3.13181			494.5	289.447			293.582	3.22962			494.5	295.919			293.44	3.21703
		495	292.775			293.276	3.23261			495	285.366			293.59	3.27129			495	290.063			293.744	3.46153			495	290.18			293.323	3.13219			495	293.505			293.563	3.21795			495	290.619			293.469	3.251
		495.5	294.118			293.296	3.2414			495.5	296.977			293.642	3.22228			495.5	293.907			293.723	3.45757			495.5	296.809			293.317	3.13946			495.5	293.82			293.552	3.20962			495.5	295.302			293.452	3.25935
		496	297.49			293.28	3.24512			496	290.405			293.616	3.21614			496	293.308			293.683	3.40168			496	290.9			293.296	3.1301			496	290.671			293.559	3.20218			496	296.467			293.462	3.24974
		496.5	290.86			293.274	3.23818			496.5	291.075			293.644	3.21213			496.5	294.91			293.662	3.43676			496.5	289.999			293.314	3.12667			496.5	288.623			293.555	3.20289			496.5	292.114			293.479	3.26728
		497	293.489			293.297	3.23747			497	294.978			293.651	3.20783			497	295.5			293.659	3.43682			497	296.922			293.315	3.12532			497	294.457			293.54	3.20819			497	296.886			293.457	3.26576
		497.5	294.33			293.274	3.25237			497.5	283.699			293.666	3.22072			497.5	293.965			293.65	3.43982			497.5	288.492			293.314	3.12356			497.5	292.554			293.53	3.22117			497.5	293.095			293.482	3.26296
		498	291.584			293.295	3.27177			498	297.867			293.719	3.14271			498	296.499			293.635	3.44069			498	294.469			293.357	3.11638			498	292.785			293.567	3.2072			498	291.703			293.476	3.26078
		498.5	291.163			293.297	3.27048			498.5	292.89			293.69	3.13119			498.5	297.018			293.637	3.44172			498.5	296.817			293.332	3.12769			498.5	298.744			293.543	3.21855			498.5	292.9			293.45	3.25821
		499	295.127			293.302	3.26813			499	293.763			293.697	3.13091			499	291.348			293.6	3.47848			499	293.914			293.317	3.11811			499	290.389			293.569	3.2316			499	289.984			293.468	3.26127
		499.5	290.7			293.307	3.27132			499.5	297.287			293.684	3.13597			499.5	293.771			293.604	3.48232			499.5	292.951			293.306	3.11951			499.5	297.153			293.558	3.23777			499.5	296.164			293.42	3.2813
		500	294.888			293.322	3.26634			500	287.436			293.654	3.13058			500	290.191			293.584	3.47414			500	291.413			293.305	3.11967			500	295.686			293.536	3.21735			500	295.784			293.439	3.29039
		500.5	291.705			293.318	3.26476			500.5	295.402			293.662	3.1153			500.5	293.287			293.62	3.48834			500.5	293.219			293.312	3.11703			500.5	294.271			293.569	3.21911			500.5	288.683			293.478	3.31458
		501	297.477			293.34	3.26927			501	292.23			293.67	3.12178			501	293.406			293.635	3.49566			501	296.619			293.302	3.12057			501	290.996			293.517	3.24653			501	298.026			293.485	3.31486
		501.5	293.187			293.291	3.28086			501.5	289.028			293.692	3.12695			501.5	296.931			293.652	3.49587			501.5	290.105			293.267	3.12291			501.5	294.898			293.506	3.25102			501.5	293.933			293.517	3.31216
		502	293.311			293.305	3.28631			502	298.169			293.705	3.11301			502	290.726			293.644	3.49872			502	297.024			293.298	3.12283			502	294.094			293.516	3.25701			502	296.448			293.489	3.3134
		502.5	296.495			293.3	3.2871			502.5	291.278			293.68	3.09708			502.5	295.74			293.64	3.49944			502.5	290.107			293.28	3.11164			502.5	293.813			293.543	3.25832			502.5	291.935			293.477	3.31771
		503	289.661			293.305	3.2931			503	292.088			293.695	3.09265			503	290.998			293.64	3.49966			503	296.955			293.284	3.10774			503	295.766			293.526	3.26021			503	291.532			293.502	3.3085
		503.5	298.103			293.335	3.2871			503.5	293.348			293.717	3.09667			503.5	294.866			293.666	3.49723			503.5	299.837			293.249	3.10573			503.5	288.788			293.528	3.26049			503.5	292.542			293.479	3.29276
		504	294.036			293.294	3.27857			504	292.288			293.7	3.10801			504	292.6			293.68	3.51077			504	289.133			293.253	3.11413			504	299.474			293.511	3.26725			504	292.814			293.474	3.29291
		504.5	290.2			293.277	3.28371			504.5	290.574			293.709	3.10656			504.5	291.022			293.702	3.50761			504.5	297.571			293.285	3.10425			504.5	292.591			293.477	3.2786			504.5	290.445			293.456	3.28624
		505	298.35			293.29	3.2766			505	295.194			293.717	3.10048			505	296.881			293.719	3.52189			505	295.989			293.274	3.09295			505	296.771			293.523	3.27607			505	294.506			293.473	3.28699
		505.5	288.91			293.264	3.25693			505.5	292.446			293.727	3.10806			505.5	290.636			293.739	3.52625			505.5	291.071			293.26	3.08696			505.5	297.577			293.47	3.26409			505.5	292.286			293.459	3.3009
		506	291.71			293.309	3.25884			506	294.705			293.743	3.10986			506	288.572			293.736	3.52828			506	296.71			293.267	3.08351			506	287.012			293.461	3.26955			506	294.711			293.462	3.30037
		506.5	293.025			293.318	3.25692			506.5	294.702			293.742	3.10963			506.5	294.217			293.732	3.5252			506.5	290.349			293.257	3.07561			506.5	300.665			293.45	3.26204			506.5	295.409			293.472	3.30159
		507	292.047			293.299	3.27096			507	294.164			293.731	3.11015			507	292.923			293.755	3.51964			507	295.288			293.274	3.06878			507	288.616			293.404	3.26776			507	289.702			293.464	3.31118
		507.5	296.171			293.329	3.2877			507.5	294.47			293.732	3.11035			507.5	296.092			293.783	3.50045			507.5	291.395			293.257	3.06696			507.5	297.459			293.486	3.31126			507.5	294.195			293.464	3.31102
		508	291.911			293.329	3.28743			508	290.91			293.732	3.11026			508	293.979			293.809	3.52411			508	290.2			293.276	3.06714			508	294.643			293.442	3.27367			508	294.812			293.461	3.31226
		508.5	289.329			293.322	3.29157			508.5	296.05			293.726	3.11639			508.5	292.992			293.798	3.53032			508.5	302.042			293.304	3.06492			508.5	284.903			293.499	3.28854			508.5	290.884			293.457	3.3112
		509	293.486			293.351	3.28169			509	294.931			293.71	3.11259			509	295.401			293.798	3.52984			509	290.209			293.251	3.0046			509	299.073			293.489	3.27955			509	296.04			293.442	3.30908
		509.5	292.443			293.338	3.28634			509.5	293.48			293.697	3.11314			509.5	290.89			293.823	3.54908			509.5	293.077			293.259	2.99844			509.5	289.764			293.473	3.2816			509.5	287.47			293.476	3.30537
		510	294.302			293.359	3.29415			510	295.341			293.717	3.12414			510	296.522			293.832	3.54918			510	293.372			293.252	3.00049			510	294.142			293.503	3.22989			510	294.389			293.473	3.30501
		510.5	291.392			293.341	3.29835			510.5	296.542			293.707	3.12209			510.5	293.626			293.829	3.54817			510.5	294.995			293.23	3.0167			510.5	297.148			293.452	3.22252			510.5	298.857			293.473	3.3051
		511	293.421			293.348	3.29579			511	294.158			293.66	3.14969			511	295.466			293.844	3.54203			511	295.103			293.22	3.01414			511	291.087			293.47	3.21185			511	290.008			293.463	3.31701
		511.5	293.877			293.347	3.29581			511.5	292.148			293.692	3.18713			511.5	299.242			293.831	3.53692			511.5	292.353			293.223	3.01655			511.5	297.713			293.482	3.21917			511.5	294.933			293.457	3.31356
		512	284.894			293.359	3.30243			512	294.053			293.694	3.18623			512	293.707			293.839	3.53804			512	293.938			293.204	3.03422			512	292.403			293.452	3.21283			512	291.739			293.501	3.29191
		512.5	290.065			293.406	3.24825			512.5	299.225			293.691	3.18616			512.5	295.023			293.831	3.53615			512.5	295.72			293.21	3.03688			512.5	288.997			293.456	3.21061			512.5	286.807			293.49	3.29278
		513	289.346			293.428	3.24054			513	297.277			293.68	3.17012			513	295.378			293.794	3.51744			513	288.338			293.191	3.03318			513	297.272			293.418	3.20435			513	294.764			293.451	3.27447
		513.5	293.009			293.443	3.22865			513.5	293.427			293.656	3.16107			513.5	288.467			293.784	3.5205			513.5	294.365			293.239	3.03341			513.5	289.269			293.433	3.20639			513.5	291.109			293.473	3.26596
		514	292.915			293.422	3.24562			514	288.991			293.668	3.16534			514	300.165			293.784	3.5205			514	293.221			293.225	3.035			514	294.747			293.454	3.19091			514	293.084			293.445	3.27722
		514.5	291.517			293.443	3.25642			514.5	290.935			293.697	3.14885			514.5	289.172			293.765	3.52213			514.5	289.619			293.219	3.03632			514.5	298.106			293.448	3.18532			514.5	292.788			293.471	3.28394
		515	293.592			293.431	3.26871			515	290.226			293.696	3.15039			515	292.246			293.791	3.502			515	297.3			293.245	3.02786			515	291.746			293.477	3.17309			515	291.244			293.5	3.25017
		515.5	298.636			293.414	3.27656			515.5	296.221			293.704	3.14345			515.5	295.046			293.761	3.47271			515.5	293.219			293.214	3.01788			515.5	299.302			293.455	3.17959			515.5	298.922			293.499	3.24987
		516	292.9			293.385	3.25573			516	292.429			293.693	3.13848			516	289.055			293.758	3.47632			516	291.806			293.197	3.02749			516	287.306			293.434	3.16266			516	294.037			293.527	3.25347
		516.5	291.424			293.372	3.26318			516.5	291.928			293.68	3.14914			516.5	302.374			293.747	3.48524			516.5	291.402			293.234	3.05615			516.5	289.93			293.432	3.16381			516.5	297.602			293.5	3.28002
		517	290.174			293.392	3.2637			517	295.867			293.66	3.17363			517	289.355			293.739	3.4841			517	289.094			293.21	3.09001			517	293.75			293.397	3.13728			517	297.44			293.523	3.29036
		517.5	296.027			293.401	3.25742			517.5	294.599			293.635	3.17532			517.5	293.729			293.76	3.46824			517.5	294.244			293.256	3.09696			517.5	294.533			293.45	3.12281			517.5	287.942			293.554	3.29866
		518	291.949			293.383	3.25281			518	291.508			293.632	3.17468			518	295.882			293.714	3.41418			518	294.723			293.236	3.10319			518	292.243			293.405	3.2334			518	294.921			293.512	3.28322
		518.5	288.287			293.391	3.25125			518.5	295.41			293.649	3.1724			518.5	289.827			293.745	3.4027			518.5	291.449			293.219	3.10413			518.5	294.278			293.427	3.2496			518.5	293.958			293.522	3.28762
		519	295.867			293.414	3.23127			519	294.78			293.611	3.19784			519	295.416			293.725	3.41384			519	296.644			293.236	3.1034			519	289.578			293.397	3.2666			519	292.74			293.498	3.27499
		519.5	297.264			293.402	3.22659			519.5	293.836			293.621	3.20465			519.5	292.52			293.693	3.42381			519.5	290.679			293.192	3.1164			519.5	293.968			293.385	3.27487			519.5	295.965			293.496	3.27202
		520	292.377			293.371	3.21959			520	291.273			293.604	3.21263			520	283.935			293.729	3.42028			520	297.585			293.206	3.11132			520	294.264			293.412	3.30469			520	287.005			293.53	3.24899
		520.5	290.92			293.368	3.22069			520.5	296.739			293.616	3.20842			520.5	302.103			293.712	3.4199			520.5	290.799			293.163	3.10941			520.5	291.051			293.42	3.29759			520.5	294.239			293.507	3.25482
		521	296.648			293.408	3.24063			521	290.563			293.612	3.20438			521	288.609			293.704	3.42533			521	290.33			293.172	3.10518			521	292.615			293.416	3.29743			521	293.192			293.527	3.27032
		521.5	293.846			293.389	3.23282			521.5	291.012			293.615	3.20144			521.5	289.49			293.737	3.36177			521.5	296.013			293.21	3.11698			521.5	291.699			293.429	3.30568			521.5	294.277			293.526	3.27057
		522	293.72			293.386	3.23268			522	301.95			293.625	3.19635			522	301.382			293.693	3.30884			522	293.784			293.173	3.12782			522	292.103			293.422	3.3117			522	293.5			293.526	3.27046
		522.5	293.909			293.394	3.23574			522.5	286.303			293.575	3.14405			522.5	284.403			293.717	3.28919			522.5	296.639			293.183	3.13259			522.5	292.375			293.466	3.35905			522.5	294.546			293.566	3.23862
		523	289.225			293.385	3.23686			523	300.425			293.608	3.10179			523	294.947			293.727	3.27879			523	295.735			293.195	3.15213			523	292.471			293.476	3.35673			523	291.31			293.566	3.23864
		523.5	295.692			293.433	3.24611			523.5	289.792			293.572	3.06409			523.5	293.961			293.658	3.26289			523.5	296.153			293.169	3.15332			523.5	292.901			293.468	3.36159			523.5	290.802			293.608	3.28789
		524	297.489			293.406	3.24945			524	297.967			293.573	3.06301			524	290.732			293.708	3.19629			524	293.03			293.183	3.17292			524	291.694			293.489	3.36747			524	289.015			293.603	3.28769
		524.5	288.555			293.383	3.23674			524.5	292.048			293.537	3.05357			524.5	297.381			293.7	3.19521			524.5	291.177			293.172	3.17692			524.5	292.703			293.49	3.36713			524.5	296.412			293.604	3.28773
		525	297.9			293.423	3.22643			525	293.805			293.536	3.05377			525	290.134			293.704	3.19619			525	287.612			293.184	3.17386			525	301.925			293.507	3.37294			525	291.346			293.618	3.29718
		525.5	290.067			293.385	3.2183			525.5	291.084			293.519	3.06196			525.5	294.13			293.708	3.19296			525.5	301.754			293.249	3.19277			525.5	289.383			293.526	3.37314			525.5	297.127			293.597	3.3254
		526	293.411			293.406	3.21034			526	289.829			293.53	3.05712			526	290.573			293.695	3.18305			526	287.465			293.191	3.14257			526	293.099			293.496	3.40744			526	299.603			293.603	3.32139
		526.5	291.15			293.417	3.2138			526.5	296.587			293.544	3.04669			526.5	290.913			293.713	3.17299			526.5	292.237			293.25	3.14532			526.5	291.41			293.471	3.36378			526.5	289.873			293.633	3.30659
		527	295.58			293.441	3.21455			527	295.631			293.552	3.05743			527	295.256			293.726	3.18013			527	295.546			293.261	3.14575			527	296.747			293.495	3.35151			527	291.898			293.618	3.30066
		527.5	300.677			293.454	3.22901			527.5	289.956			293.525	3.06322			527.5	290.533			293.739	3.17255			527.5	287.348			293.251	3.14163			527.5	293.63			293.49	3.35287			527.5	294.509			293.617	3.3019
		528	293.439			293.418	3.18818			528	294.823			293.551	3.05526			528	293.713			293.753	3.1662			528	297.996			293.297	3.12236			528	296.577			293.53	3.37623			528	291.586			293.568	3.3208
		528.5	291.605			293.403	3.19518			528.5	293.666			293.544	3.054			528.5	293.743			293.772	3.18758			528.5	294.871			293.285	3.10839			528.5	297.722			293.527	3.37355			528.5	297.322			293.555	3.30231
		529	294.878			293.448	3.23204			529	291.706			293.537	3.05504			529	290.268			293.802	3.18508			529	293.018			293.274	3.10655			529	292.054			293.514	3.3786			529	292.866			293.57	3.29231
		529.5	293.937			293.427	3.23663			529.5	301.954			293.547	3.05229			529.5	295.294			293.812	3.18781			529.5	295.473			293.264	3.1105			529.5	295.019			293.507	3.3737			529.5	294.523			293.58	3.29025
		530	292.835			293.428	3.2368			530	287.35			293.483	3.00979			530	291.79			293.785	3.21155			530	290.608			293.266	3.11148			530	296.107			293.471	3.36664			530	297.09			293.582	3.2906
		530.5	294.867			293.443	3.24157			530.5	298.262			293.519	2.97937			530.5	292.802			293.797	3.20269			530.5	298.557			293.286	3.1073			530.5	289.091			293.496	3.37464			530.5	295			293.585	3.28905
		531	296.912			293.403	3.27387			531	290.929			293.499	2.9609			531	294.687			293.794	3.20166			531	290.247			293.254	3.08567			531	294.861			293.503	3.37908			531	299.302			293.558	3.2798
		531.5	291.689			293.404	3.27531			531.5	292.754			293.509	2.95576			531.5	291.435			293.809	3.19903			531.5	291.387			293.259	3.0814			531.5	294.994			293.469	3.38603			531.5	292.706			293.576	3.28512
		532	294.375			293.403	3.27593			532	297.275			293.53	2.9657			532	295.495			293.817	3.19856			532	293.916			293.269	3.07855			532	294.792			293.486	3.37246			532	289.76			293.538	3.31665
		532.5	296.103			293.419	3.28863			532.5	293.155			293.502	2.95658			532.5	293.888			293.826	3.20376			532.5	291.448			293.272	3.07939			532.5	295.491			293.477	3.37119			532.5	297.241			293.521	3.30699
		533	292.19			293.413	3.28453			533	301.513			293.539	2.99729			533	293.515			293.827	3.20309			533	291.279			293.299	3.08687			533	288.459			293.462	3.37115			533	285.72			293.495	3.31487
		533.5	301.891			293.374	3.34467			533.5	289.863			293.475	2.96305			533.5	298.684			293.819	3.20091			533.5	294.693			293.3	3.08648			533.5	287.366			293.505	3.44151			533.5	297.418			293.432	3.32378
		534	291.702			293.361	3.31649			534	296.956			293.509	2.9604			534	293.103			293.832	3.20654			534	286.395			293.326	3.12101			534	298.068			293.459	3.47645			534	292.782			293.474	3.36831
		534.5	300.48			293.373	3.31479			534.5	295.758			293.493	2.95034			534.5	294.181			293.82	3.21228			534.5	297.236			293.347	3.08778			534.5	290.098			293.513	3.48347			534.5	290.583			293.482	3.36129
		535	292.695			293.319	3.28687			535	292.581			293.481	2.94598			535	293.8			293.815	3.20488			535	294.952			293.335	3.077			535	295.909			293.54	3.45639			535	302.687			293.466	3.35077
		535.5	294.066			293.342	3.2984			535.5	290.274			293.5	2.9524			535.5	293.27			293.822	3.20497			535.5	291.503			293.339	3.07987			535.5	294.202			293.526	3.44327			535.5	295.377			293.524	3.31625
		536	293.883			293.319	3.3088			536	293.409			293.494	2.96012			536	297.09			293.815	3.20585			536	295.376			293.347	3.07715			536	288.749			293.505	3.47721			536	288.621			293.494	3.30816
		536.5	294.016			293.325	3.31086			536.5	294.065			293.489	2.96114			536.5	288.827			293.829	3.21231			536.5	289.549			293.363	3.09548			536.5	296.167			293.473	3.48426			536.5	292.672			293.486	3.31184
		537	291.418			293.346	3.32851			537	294.954			293.496	2.96428			537	295.04			293.824	3.21414			537	295.137			293.374	3.08567			537	289.281			293.468	3.48389			537	290.259			293.504	3.30588
		537.5	297.676			293.318	3.36829			537.5	293.556			293.5	2.96683			537.5	295.68			293.809	3.20579			537.5	291.671			293.33	3.12432			537.5	296.657			293.499	3.46895			537.5	291.117			293.436	3.25563
		538	294.637			293.316	3.36606			538	297.186			293.508	2.96953			538	292.747			293.828	3.18728			538	293.193			293.366	3.14649			538	297.559			293.476	3.46624			538	298.906			293.426	3.25269
		538.5	295.508			293.302	3.36624			538.5	295.385			293.477	2.96384			538.5	295.837			293.812	3.1891			538.5	292.858			293.346	3.16015			538.5	293.567			293.514	3.46151			538.5	296.964			293.457	3.23572
		539	294.073			293.297	3.3634			539	294.784			293.489	2.97653			539	291.69			293.804	3.18637			539	291.82			293.387	3.20726			539	296.711			293.522	3.47045			539	293.623			293.489	3.25936
		539.5	292.298			293.316	3.37865			539.5	295.409			293.475	2.97712			539.5	294.331			293.782	3.20779			539.5	295.393			293.389	3.20647			539.5	289.133			293.455	3.51947			539.5	295.556			293.509	3.25185
		540	292.373			293.32	3.37788			540	291.847			293.458	2.97563			540	298.838			293.792	3.21748			540	291.532			293.369	3.20602			540	294.844			293.464	3.52203			540	293.189			293.522	3.2474
		540.5	290.692			293.32	3.37805			540.5	297.235			293.464	2.97355			540.5	285.781			293.792	3.21785			540.5	293.849			293.389	3.20683			540.5	297.086			293.475	3.53535			540.5	294.584			293.501	3.22555
		541	285.328			293.333	3.37291			541	291.792			293.423	2.97798			541	299.532			293.777	3.22234			541	296.08			293.382	3.20752			541	292.886			293.49	3.52328			541	294.912			293.476	3.21775
		541.5	295.614			293.361	3.3286			541.5	298.436			293.445	2.98147			541.5	289.085			293.759	3.20406			541.5	297.184			293.348	3.21507			541.5	295.96			293.496	3.52705			541.5	287.548			293.454	3.23168
		542	289.919			293.338	3.32894			542	293.297			293.403	2.96984			542	296.801			293.777	3.16867			542	291.559			293.338	3.20622			542	296.197			293.469	3.5205			542	296.527			293.439	3.22879
		542.5	298.953			293.316	3.36586			542.5	292.584			293.416	2.97543			542.5	295.384			293.769	3.15628			542.5	296.992			293.318	3.2292			542.5	297.615			293.468	3.52061			542.5	290.243			293.443	3.22897
		543	295.037			293.274	3.34797			543	295.368			293.462	3.03307			543	292.384			293.785	3.14058			543	288.764			293.301	3.21872			543	292.019			293.465	3.51855			543	292.656			293.44	3.22822
		543.5	292.451			293.292	3.3665			543.5	286.207			293.444	3.03229			543.5	294.742			293.767	3.13346			543.5	294.654			293.342	3.21307			543.5	294.626			293.429	3.52747			543.5	294.676			293.444	3.23053
		544	295.686			293.289	3.36736			544	295.404			293.492	2.99293			544	295.489			293.787	3.15486			544	292.637			293.315	3.22429			544	300.125			293.409	3.515			544	292.017			293.476	3.20323
		544.5	294.124			293.287	3.36619			544.5	286.968			293.485	2.99			544.5	288.997			293.788	3.15412			544.5	291.644			293.331	3.22841			544.5	290.512			293.424	3.51511			544.5	299.241			293.468	3.19754
		545	288.111			293.321	3.40744			545	287.477			293.5	2.9636			545	295.135			293.79	3.15455			545	293.944			293.316	3.24294			545	298.417			293.406	3.51786			545	288.903			293.5	3.19681
		545.5	293.121			293.308	3.43141			545.5	300.859			293.529	2.93276			545.5	290.665			293.815	3.18923			545.5	289.409			293.343	3.27068			545.5	292.545			293.371	3.48537			545.5	293.868			293.508	3.19681
		546	293.496			293.322	3.43621			546	288.472			293.478	2.89352			546	294.151			293.842	3.17097			546	294.573			293.349	3.26408			546	289.702			293.37	3.48582			546	298.746			293.533	3.22565
		546.5	298.56			293.329	3.43789			546.5	292.982			293.466	2.92013			546.5	289.037			293.833	3.1699			546.5	295.008			293.336	3.26468			546.5	292.92			293.348	3.46755			546.5	291.842			293.514	3.24656
		547	290.593			293.323	3.42986			547	295.088			293.486	2.93137			547	291.868			293.856	3.16378			547	289.301			293.337	3.26528			547	296.621			293.371	3.47786			547	297.473			293.506	3.23413
		547.5	296.071			293.347	3.42746			547.5	289.38			293.448	2.96035			547.5	289.366			293.858	3.16397			547.5	292.663			293.348	3.25521			547.5	289.359			293.362	3.49029			547.5	297.148			293.542	3.22271
		548	293.352			293.318	3.42896			548	295.616			293.48	2.95071			548	292.045			293.886	3.14599			548	293.765			293.353	3.2549			548	300.004			293.375	3.49401			548	289.171			293.551	3.22645
		548.5	289.367			293.335	3.43759			548.5	289.474			293.465	2.94735			548.5	294.61			293.915	3.15409			548.5	292.193			293.358	3.2564			548.5	289.208			293.335	3.5037			548.5	296.311			293.56	3.24306
		549	295.722			293.353	3.42619			549	293.567			293.48	2.93457			549	290.743			293.92	3.1485			549	293.875			293.37	3.25675			549	299.154			293.385	3.51796			549	291.069			293.566	3.24101
		549.5	293.775			293.343	3.42218			549.5	292.238			293.488	2.93675			549.5	293.346			293.935	3.14668			549.5	289.077			293.356	3.26069			549.5	293.736			293.356	3.48701			549.5	293.055			293.559	3.23365
		550	289.695			293.341	3.42206			550	292.604			293.493	2.93546			550	291.531			293.933	3.14645			550	294.004			293.386	3.24849			550	292.392			293.37	3.47586			550	296.628			293.538	3.22365
		550.5	297.723			293.348	3.41598			550.5	298.904			293.499	2.93486			550.5	294.371			293.914	3.17803			550.5	289.903			293.401	3.25909			550.5	298.134			293.341	3.45148			550.5	294.508			293.53	3.23788
		551	286.66			293.315	3.40591			551	292.31			293.497	2.93099			551	291.143			293.95	3.21243			551	297.651			293.411	3.25133			551	290.5			293.331	3.45332			551	294.687			293.543	3.2549
		551.5	296.315			293.356	3.37487			551.5	299.483			293.49	2.93492			551.5	293.518			293.949	3.21349			551.5	293.358			293.363	3.26054			551.5	297.598			293.312	3.46923			551.5	292.679			293.546	3.25299
		552	296.053			293.363	3.38265			552	291.196			293.455	2.905			552	297.051			293.948	3.21345			552	288.073			293.381	3.27038			552	293.473			293.301	3.45758			552	289.185			293.548	3.2528
		552.5	288.091			293.329	3.3892			552.5	296.372			293.478	2.9055			552.5	295.981			293.973	3.21102			552.5	299.018			293.392	3.25568			552.5	294.221			293.297	3.46176			552.5	299.567			293.539	3.24658
		553	300.707			293.386	3.39592			553	295.211			293.478	2.9049			553	294.564			293.965	3.21474			553	289.171			293.356	3.2333			553	295.092			293.289	3.45352			553	289.97			293.554	3.25803
		553.5	290.352			293.365	3.3638			553.5	295.033			293.485	2.91105			553.5	296.637			293.941	3.20907			553.5	288.523			293.378	3.21975			553.5	293.423			293.267	3.46635			553.5	294.287			293.56	3.26088
		554	291.379			293.381	3.35702			554	297.286			293.475	2.90909			554	299.902			293.962	3.23541			554	300.171			293.391	3.20548			554	293.488			293.251	3.46896			554	297.107			293.578	3.26636
		554.5	296.859			293.41	3.36464			554.5	292.869			293.504	2.97261			554.5	294.399			293.907	3.31645			554.5	289.358			293.365	3.17113			554.5	289.145			293.247	3.46731			554.5	292.369			293.605	3.2521
		555	287.525			293.382	3.35876			555	298.256			293.5	2.97389			555	294.407			293.928	3.34588			555	298.067			293.387	3.1585			555	296.202			293.221	3.48498			555	294.503			293.576	3.22426
		555.5	291.629			293.41	3.33307			555.5	295.363			293.491	2.96191			555.5	290.012			293.896	3.31891			555.5	292.028			293.35	3.14687			555.5	295.546			293.241	3.49739			555.5	295.33			293.59	3.21444
		556	294.533			293.439	3.34229			556	289.421			293.485	2.95934			556	290.774			293.89	3.3192			556	289.126			293.382	3.16665			556	296.966			293.243	3.49528			556	294.033			293.6	3.21948
		556.5	294.407			293.407	3.36201			556.5	298.435			293.513	2.94763			556.5	291.767			293.915	3.34151			556.5	294.773			293.405	3.15228			556.5	294.059			293.229	3.48901			556.5	293.546			293.562	3.22263
		557	296.935			293.414	3.36563			557	289.73			293.49	2.92701			557	298.083			293.922	3.33407			557	289.835			293.42	3.1663			557	294.628			293.259	3.53305			557	291.684			293.582	3.22714
		557.5	290.007			293.391	3.35743			557.5	290.353			293.511	2.91503			557.5	298.052			293.963	3.34529			557.5	295.438			293.424	3.162			557.5	291.431			293.225	3.53014			557.5	294.856			293.564	3.23169
		558	293.995			293.411	3.34915			558	293.383			293.524	2.90673			558	289.232			293.974	3.34165			558	294.275			293.421	3.16008			558	295.91			293.209	3.53333			558	298.495			293.559	3.22962
		558.5	292.856			293.429	3.36211			558.5	291.825			293.53	2.90755			558.5	294.314			293.911	3.38213			558.5	289.984			293.421	3.16014			558.5	297.576			293.234	3.56048			558.5	285.827			293.562	3.23059
		559	288.914			293.423	3.3639			559	299.474			293.535	2.90548			559	294.494			293.914	3.38609			559	297.414			293.435	3.15095			559	284.977			293.25	3.55964			559	294.695			293.544	3.24124
		559.5	296.379			293.482	3.38742			559.5	289.211			293.515	2.87849			559.5	298.012			293.903	3.40523			559.5	295.407			293.392	3.15656			559.5	293.976			293.245	3.55683			559.5	288.691			293.577	3.25576
		560	296.308			293.459	3.38356			560	290.466			293.528	2.8653			560	289.06			293.899	3.4052			560	291.292			293.4	3.16426			560	292.639			293.211	3.54773			560	290.386			293.561	3.25688
		560.5	295.456			293.445	3.37757			560.5	291.477			293.535	2.85922			560.5	298.388			293.889	3.40641			560.5	296.372			293.388	3.17715			560.5	292.694			293.258	3.50001			560.5	297.277			293.539	3.23811
		561	293.424			293.439	3.37501			561	290.448			293.546	2.8555			561	290.41			293.85	3.40332			561	286.142			293.385	3.17438			561	296.518			293.274	3.51014			561	288.397			293.587	3.19328
		561.5	289.358			293.437	3.37523			561.5	297.335			293.543	2.85836			561.5	293.015			293.895	3.39877			561.5	298.428			293.438	3.14163			561.5	292.228			293.274	3.51015			561.5	297.615			293.586	3.19299
		562	293.226			293.456	3.36287			562	292.764			293.518	2.84699			562	291.866			293.863	3.3864			562	292.51			293.403	3.12444			562	295.366			293.285	3.51175			562	288.535			293.586	3.19284
		562.5	287.22			293.437	3.37501			562.5	290.343			293.525	2.84677			562.5	292.216			293.89	3.3807			562.5	292.702			293.44	3.1563			562.5	297.291			293.254	3.51029			562.5	293.666			293.622	3.19698
		563	289.351			293.492	3.36396			563	295.753			293.534	2.83925			563	292.026			293.882	3.38481			563	296.481			293.442	3.15589			563	289.364			293.257	3.50965			563	294.734			293.611	3.18797
		563.5	298.443			293.507	3.35233			563.5	290.593			293.528	2.83566			563.5	299.074			293.902	3.38482			563.5	293.407			293.425	3.1487			563.5	293.34			293.256	3.50887			563.5	290.318			293.626	3.16988
		564	289.34			293.486	3.33466			564	293.327			293.528	2.83555			564	292.447			293.924	3.38771			564	293.489			293.446	3.16264			564	293.918			293.246	3.5005			564	295.707			293.613	3.15852
		564.5	293.263			293.514	3.32293			564.5	293.417			293.529	2.83551			564.5	291.066			293.91	3.40108			564.5	292.772			293.44	3.16383			564.5	288.514			293.297	3.51692			564.5	293.337			293.638	3.13774
		565	291.034			293.496	3.33329			565	294.09			293.524	2.83652			565	299.759			293.874	3.38422			565	298.455			293.446	3.16373			565	292.076			293.288	3.51877			565	289.829			293.669	3.16786
		565.5	296.305			293.519	3.33207			565.5	292.529			293.503	2.84909			565.5	296.565			293.897	3.39019			565.5	295.165			293.441	3.15721			565.5	292.092			293.298	3.5228			565.5	290.854			293.664	3.16695
		566	295.727			293.501	3.32667			566	292.809			293.52	2.85381			566	292.406			293.882	3.41033			566	295.63			293.402	3.18472			566	293.337			293.31	3.51028			566	291.229			293.692	3.16214
		566.5	293.987			293.489	3.32298			566.5	292.093			293.54	2.86293			566.5	295.275			293.896	3.44043			566.5	291.801			293.399	3.18277			566.5	294.013			293.331	3.51544			566.5	291.626			293.698	3.16733
		567	294.427			293.511	3.34114			567	293.937			293.56	2.86683			567	292.762			293.879	3.43552			567	290.633			293.401	3.18183			567	291.769			293.343	3.51516			567	297.887			293.718	3.17738
		567.5	287.783			293.513	3.34159			567.5	293.32			293.534	2.88631			567.5	291.602			293.893	3.43532			567.5	294.59			293.411	3.17632			567.5	294.688			293.332	3.51821			567.5	291.021			293.724	3.17111
		568	288.699			293.54	3.31687			568	293.323			293.54	2.88706			568	293.975			293.882	3.43449			568	295.582			293.394	3.17903			568	295.155			293.328	3.51792			568	294.706			293.744	3.16547
		568.5	292.241			293.542	3.31329			568.5	297.215			293.537	2.8876			568.5	289.47			293.862	3.45194			568.5	293.622			293.369	3.18109			568.5	294.171			293.311	3.53357			568.5	291.768			293.751	3.16137
		569	293.004			293.558	3.31428			569	292.884			293.512	2.87723			569	298.074			293.916	3.49949			569	292.814			293.368	3.18104			569	296.097			293.309	3.53306			569	296.576			293.77	3.15962
		569.5	289.449			293.554	3.31548			569.5	298.755			293.522	2.87841			569.5	294.336			293.929	3.50492			569.5	286.892			293.345	3.2029			569.5	294.077			293.311	3.53395			569.5	297.922			293.778	3.17315
		570	298.734			293.571	3.30289			570	293.104			293.491	2.85529			570	299.609			293.931	3.50324			570	297.905			293.386	3.17254			570	286.978			293.31	3.53373			570	291.567			293.813	3.1805
		570.5	289.691			293.541	3.28314			570.5	297.793			293.491	2.85532			570.5	293.588			293.923	3.49544			570.5	293.552			293.369	3.15736			570.5	294.441			293.322	3.54795			570.5	293.731			293.797	3.18407
		571	293.387			293.555	3.27264			571	292.366			293.461	2.84141			571	291.834			293.899	3.50828			571	293.191			293.389	3.17124			571	292.033			293.313	3.54833			571	291.128			293.781	3.20204
		571.5	293.491			293.522	3.30868			571.5	293.833			293.471	2.84098			571.5	299.388			293.9	3.5094			571.5	294.386			293.396	3.17255			571.5	291.482			293.36	3.52602			571.5	291.955			293.735	3.22618
		572	287.01			293.544	3.32299			572	293.145			293.457	2.84589			572	287.692			293.903	3.50936			572	290.209			293.39	3.17186			572	291.354			293.328	3.54501			572	296.03			293.711	3.21263
		572.5	296.329			293.586	3.29376			572.5	294.706			293.451	2.84757			572.5	299.176			293.889	3.52318			572.5	289.57			293.402	3.16418			572.5	292.79			293.349	3.5498			572.5	289.551			293.71	3.21386
		573	289.993			293.573	3.28802			573	290.677			293.446	2.84621			573	298.362			293.866	3.50211			573	295.832			293.407	3.15935			573	298.124			293.359	3.54733			573	297.937			293.723	3.21903
		573.5	293.228			293.583	3.28004			573.5	294.313			293.421	2.89242			573.5	298.597			293.888	3.47694			573.5	291.535			293.391	3.15509			573.5	291.832			293.333	3.58159			573.5	293.998			293.743	3.21539
		574	298.267			293.568	3.28864			574	297.265			293.43	2.89823			574	296.84			293.86	3.45661			574	292.752			293.415	3.15881			574	289.581			293.366	3.60756			574	292.664			293.751	3.21289
		574.5	289.555			293.536	3.27403			574.5	297.524			293.405	2.88689			574.5	290.871			293.845	3.44354			574.5	293.956			293.432	3.16522			574.5	295.39			293.306	3.62891			574.5	301.122			293.751	3.21276
		575	292.292			293.542	3.26743			575	288.63			293.397	2.87804			575	290.57			293.826	3.42751			575	292.682			293.443	3.17055			575	290.052			293.339	3.64539			575	287.047			293.773	3.1988
		575.5	296.572			293.558	3.26903			575.5	297.526			293.449	2.88652			575.5	296.155			293.804	3.42205			575.5	295.471			293.433	3.176			575.5	295.164			293.357	3.63562			575.5	290.6			293.771	3.19642
		576	291.123			293.538	3.26293			576	294.461			293.416	2.87849			576	294.439			293.826	3.41741			576	290.753			293.422	3.17277			576	292.706			293.32	3.65207			576	293.897			293.791	3.21067
		576.5	296.828			293.525	3.27716			576.5	294.291			293.441	2.91068			576.5	294.419			293.842	3.4096			576.5	293.947			293.454	3.17811			576.5	293.839			293.344	3.64616			576.5	293.607			293.767	3.23747
		577	288.661			293.524	3.27619			577	295.783			293.449	2.91498			577	294.974			293.832	3.40571			577	290.791			293.462	3.18165			577	291.278			293.316	3.6536			577	296.164			293.744	3.20147
		577.5	293.125			293.551	3.25817			577.5	289.178			293.457	2.92398			577.5	289.319			293.817	3.40963			577.5	291.206			293.476	3.17602			577.5	294.92			293.342	3.66859			577.5	287.349			293.8	3.18084
		578	296.028			293.549	3.25855			578	294.157			293.488	2.91114			578	291.077			293.814	3.40937			578	292.87			293.503	3.18001			578	291.695			293.33	3.67124			578	297.747			293.801	3.17983
		578.5	291.696			293.539	3.25402			578.5	293.91			293.482	2.9109			578.5	297.212			293.798	3.41142			578.5	293.513			293.485	3.19432			578.5	294.785			293.335	3.66904			578.5	294.363			293.81	3.18261
		579	296.825			293.562	3.2574			579	292.832			293.472	2.9128			579	293.786			293.832	3.40042			579	286.887			293.487	3.19447			579	292.58			293.337	3.67004			579	289.528			293.791	3.19573
		579.5	288.643			293.55	3.24972			579.5	295.169			293.505	2.94212			579.5	290.475			293.849	3.39504			579.5	295.796			293.527	3.16186			579.5	295.732			293.358	3.67249			579.5	292.065			293.768	3.1946
		580	294.826			293.586	3.23473			580	293.119			293.484	2.94514			580	291.405			293.809	3.40206			580	291.601			293.5	3.16595			580	289.103			293.365	3.67708			580	292.598			293.807	3.16294
		580.5	295.568			293.585	3.23467			580.5	289.037			293.51	2.96445			580.5	294.902			293.798	3.40606			580.5	292.4			293.504	3.16418			580.5	292.353			293.375	3.67745			580.5	291.82			293.775	3.1549
		581	284.552			293.57	3.2325			581	296.245			293.522	2.95104			581	291.644			293.814	3.39787			581	295.462			293.493	3.17142			581	295.388			293.342	3.68571			581	296.587			293.779	3.15625
		581.5	297.181			293.62	3.16929			581.5	287.331			293.529	2.95861			581.5	292.255			293.796	3.42146			581.5	290.912			293.504	3.18219			581.5	291.01			293.349	3.67907			581.5	288.122			293.781	3.15388
		582	293.559			293.616	3.16581			582	289.725			293.576	2.93504			582	298.28			293.803	3.4252			582	293.765			293.512	3.17771			582	296.128			293.377	3.69322			582	296.317			293.815	3.17116
		582.5	291.206			293.606	3.16929			582.5	293.032			293.586	2.92542			582.5	285.901			293.82	3.42287			582.5	298.281			293.505	3.17866			582.5	293.08			293.337	3.71422			582.5	298.703			293.834	3.17516
		583	292.978			293.612	3.16596			583	290.433			293.603	2.93275			583	297.442			293.823	3.4218			583	288.075			293.489	3.16238			583	292.184			293.348	3.71055			583	288.809			293.798	3.23845
		583.5	297.357			293.626	3.16963			583.5	293.207			293.592	2.94892			583.5	299.82			293.814	3.41307			583.5	295.136			293.52	3.13947			583.5	297.149			293.336	3.70535			583.5	295.809			293.789	3.23328
		584	296.788			293.629	3.17358			584	296.718			293.582	2.95412			584	288.846			293.854	3.36642			584	291.41			293.49	3.15239			584	290.161			293.334	3.7055			584	296.283			293.805	3.21333
		584.5	292.922			293.618	3.1663			584.5	289.784			293.58	2.95196			584.5	304.477			293.854	3.36568			584.5	294.124			293.504	3.14927			584.5	293.043			293.348	3.70632			584.5	291.82			293.79	3.20847
		585	292.986			293.639	3.17559			585	299.259			293.601	2.93995			585	288.339			293.852	3.36192			585	296.943			293.5	3.14898			585	295.877			293.324	3.69715			585	294.324			293.769	3.18988
		585.5	295.085			293.642	3.17525			585.5	293.571			293.576	2.9127			585.5	294.379			293.853	3.35969			585.5	293.31			293.482	3.13953			585.5	285.843			293.342	3.69048			585.5	290.622			293.798	3.17062
		586	293.239			293.617	3.18367			586	292.649			293.567	2.91531			586	293.818			293.797	3.27405			586	299.515			293.498	3.14708			586	296.988			293.36	3.69789			586	296.514			293.779	3.16958
		586.5	298.11			293.641	3.1993			586.5	292.624			293.57	2.91471			586.5	292.083			293.829	3.25163			586.5	292.17			293.463	3.11897			586.5	299.324			293.365	3.70137			586.5	294.645			293.756	3.16802
		587	290.308			293.597	3.19855			587	289.084			293.529	2.9833			587	296.94			293.82	3.25249			587	292.977			293.513	3.1808			587	295.754			293.411	3.66448			587	291.645			293.732	3.20136
		587.5	291.589			293.622	3.19238			587.5	297.606			293.585	3.00328			587.5	294.128			293.826	3.25377			587.5	298.353			293.499	3.18935			587.5	293.831			293.384	3.6576			587.5	292.605			293.767	3.24676
		588	295.38			293.63	3.18932			588	297.515			293.565	2.98975			588	291.923			293.803	3.28217			588	290.116			293.458	3.18006			588	291.709			293.371	3.64075			588	294.387			293.773	3.24187
		588.5	288.671			293.633	3.19085			588.5	293.283			293.53	2.98494			588.5	293.031			293.802	3.28068			588.5	296.714			293.508	3.20662			588.5	291.637			293.357	3.63693			588.5	291.039			293.759	3.236
		589	297.251			293.686	3.19805			589	295.213			293.531	2.98489			589	294.081			293.789	3.28452			589	289.708			293.492	3.19857			589	294.254			293.332	3.65104			589	292.217			293.779	3.25364
		589.5	290.651			293.658	3.19169			589.5	287.124			293.521	2.98261			589.5	287.699			293.802	3.28232			589.5	297.549			293.534	3.20544			589.5	288.306			293.355	3.65548			589.5	294.247			293.77	3.26198
		590	291.917			293.659	3.19107			590	296.097			293.557	2.94874			590	297.536			293.804	3.28201			590	294.177			293.5	3.19925			590	298.103			293.366	3.65362			590	286.578			293.812	3.30024
		590.5	294.301			293.694	3.21137			590.5	291.547			293.54	2.94396			590.5	292.384			293.789	3.28768			590.5	293.931			293.487	3.20159			590.5	296.512			293.339	3.66772			590.5	298.134			293.801	3.30175
		591	290.804			293.667	3.22976			591	291.942			293.537	2.94609			591	298.577			293.835	3.26696			591	292.555			293.481	3.20191			591	290.341			293.385	3.66246			591	288.893			293.815	3.29588
		591.5	294.855			293.682	3.22344			591.5	298.49			293.565	2.95685			591.5	290.18			293.825	3.2582			591.5	294.258			293.49	3.20182			591.5	291.258			293.335	3.6665			591.5	292.785			293.816	3.29552
		592	288.299			293.697	3.23571			592	292.182			293.516	2.95642			592	293.754			293.818	3.26248			592	292.332			293.503	3.21046			592	295.065			293.321	3.65963			592	296.612			293.812	3.29548
		592.5	292.206			293.721	3.21335			592.5	294.252			293.518	2.95574			592.5	296.743			293.791	3.24524			592.5	294.245			293.501	3.21173			592.5	292.284			293.352	3.661			592.5	290.661			293.846	3.25517
		593	299.342			293.739	3.21503			593	295.523			293.497	2.96547			593	291.025			293.803	3.23613			593	289.705			293.49	3.21293			593	288.034			293.357	3.65907			593	300.144			293.825	3.24082
		593.5	293.166			293.691	3.20284			593.5	294.91			293.494	2.96396			593.5	297.214			293.787	3.24414			593.5	292.36			293.522	3.20745			593.5	297.011			293.358	3.65965			593.5	290.16			293.816	3.25751
		594	297.837			293.69	3.20299			594	296.643			293.497	2.96592			594	292.106			293.749	3.25482			594	298.278			293.533	3.20711			594	293.57			293.371	3.66074			594	291.607			293.837	3.26467
		594.5	297.143			293.688	3.20007			594.5	293.099			293.462	2.97005			594.5	292.198			293.753	3.25173			594.5	286.909			293.509	3.18943			594.5	295.095			293.393	3.6419			594.5	298.519			293.816	3.26036
		595	288.335			293.67	3.19071			595	293.221			293.484	2.98374			595	294.427			293.743	3.24414			595	297.664			293.553	3.15903			595	290.846			293.378	3.63309			595	291.465			293.811	3.26514
		595.5	296.699			293.707	3.17175			595.5	295.719			293.454	3.01658			595.5	285.861			293.74	3.246			595.5	288.963			293.53	3.14572			595.5	292.6			293.377	3.63308			595.5	295.583			293.801	3.24865
		596	290.941			293.671	3.17859			596	291.812			293.452	3.01516			596	293.279			293.767	3.25568			596	292.578			293.557	3.12961			596	290.925			293.391	3.64494			596	294.17			293.817	3.23853
		596.5	296.236			293.703	3.18262			596.5	295.919			293.457	3.01336			596.5	291.593			293.751	3.26038			596.5	294.527			293.549	3.13446			596.5	288.546			293.397	3.64172			596.5	291.081			293.84	3.23913
		597	295.513			293.688	3.17762			597	292.599			293.456	3.01254			597	291.971			293.797	3.21295			597	290.264			293.555	3.13766			597	296.058			293.433	3.66866			597	295.867			293.813	3.22226
		597.5	288.883			293.663	3.18322			597.5	297.938			293.48	3.02552			597.5	295.85			293.814	3.22005			597.5	296.603			293.584	3.13409			597.5	289.63			293.463	3.67277			597.5	287.275			293.813	3.22228
		598	298.423			293.696	3.16766			598	294.459			293.474	3.01783			598	286.477			293.821	3.21685			598	297.143			293.56	3.12934			598	297.778			293.464	3.67155			598	296.901			293.8	3.2204
		598.5	292.181			293.653	3.16158			598.5	292.013			293.487	3.02784			598.5	297.307			293.848	3.22407			598.5	289.421			293.548	3.12009			598.5	290.633			293.454	3.66713			598.5	299.377			293.778	3.23192
		599	292.072			293.659	3.1599			599	294.246			293.508	3.03218			599	293			293.836	3.2211			599	293.799			293.529	3.15609			599	294.355			293.463	3.65982			599	294.327			293.774	3.23564
		599.5	296.039			293.665	3.15808			599.5	291.173			293.488	3.04061			599.5	298.587			293.874	3.17846			599.5	291.857			293.555	3.17928			599.5	297.056			293.44	3.64696			599.5	296.465			293.777	3.23787
		600	293.885			293.625	3.1792			600	291.151			293.507	3.03791			600	296.828			293.871	3.17552			600	292.738			293.535	3.20229			600	286.58			293.5	3.69687			600	290.547			293.771	3.25107
		600.5	293.949			293.671	3.25118			600.5	289.229			293.524	3.03413			600.5	291.623			293.881	3.17564			600.5	292.761			293.554	3.20883			600.5	296.398			293.492	3.69674			600.5	293.567			293.782	3.26438
		601	296.252			293.642	3.27454			601	296.998			293.539	3.02039			601	292.616			293.845	3.16266			601	291.204			293.569	3.21231			601	296.38			293.462	3.69161			601	292.846			293.74	3.24562
		601.5	287.615			293.626	3.26967			601.5	296.607			293.534	3.01544			601.5	296.977			293.832	3.1557			601.5	289.537			293.574	3.20954			601.5	291.458			293.503	3.66002			601.5	293.012			293.724	3.25078
		602	295.976			293.664	3.24403			602	291.596			293.511	3.00939			602	295.932			293.82	3.15206			602	296.446			293.614	3.20965			602	294.354			293.496	3.65216			602	295.287			293.708	3.24504
		602.5	292.287			293.643	3.24279			602.5	293.189			293.506	3.01331			602.5	298.485			293.824	3.15009			602.5	293.329			293.594	3.20462			602.5	290.542			293.477	3.64694			602.5	288.789			293.701	3.25309
		603	297.556			293.65	3.24137			603	294.257			293.543	3.05548			603	295.377			293.846	3.15741			603	290.996			293.598	3.20484			603	289.028			293.457	3.64199			603	293.061			293.737	3.28515
		603.5	295.662			293.652	3.24442			603.5	296.46			293.537	3.05533			603.5	298.327			293.853	3.16527			603.5	289.934			293.62	3.20202			603.5	297.847			293.476	3.64185			603.5	294.888			293.734	3.27715
		604	289.891			293.631	3.24557			604	289.939			293.552	3.07712			604	296.445			293.854	3.16593			604	300.588			293.609	3.21932			604	289.008			293.487	3.64779			604	288.81			293.715	3.29016
		604.5	290.581			293.639	3.23809			604.5	294.155			293.565	3.06711			604.5	290.54			293.844	3.15432			604.5	295.462			293.562	3.18544			604.5	290.663			293.491	3.64517			604.5	294.395			293.74	3.3025
		605	292.866			293.661	3.23244			605	292.194			293.56	3.0671			605	296.097			293.823	3.15732			605	295.382			293.548	3.18314			605	294.568			293.521	3.63287			605	291.725			293.702	3.35352
		605.5	293.082			293.662	3.23232			605.5	297.126			293.553	3.0718			605.5	295.106			293.799	3.14126			605.5	293.234			293.539	3.18049			605.5	288.462			293.528	3.64359			605.5	293.869			293.702	3.35358
		606	297.939			293.669	3.23249			606	295.707			293.519	3.06914			606	294.207			293.769	3.14521			606	292.521			293.527	3.1868			606	303.361			293.56	3.63193			606	292.414			293.719	3.33725
		606.5	293.58			293.655	3.22017			606.5	294.545			293.503	3.06625			606.5	299.562			293.762	3.1529			606.5	294.727			293.539	3.1878			606.5	291.85			293.55	3.64253			606.5	296.5			293.712	3.33981
		607	289.019			293.663	3.22199			607	292.477			293.519	3.08038			607	290.722			293.731	3.16128			607	293.602			293.523	3.19039			607	300.026			293.561	3.64829			607	293.694			293.707	3.33877
		607.5	298.168			293.663	3.22127			607.5	294.391			293.528	3.08005			607.5	295.939			293.765	3.21453			607.5	291.902			293.534	3.19474			607.5	295.487			293.578	3.63231			607.5	294.851			293.703	3.34506
		608	296.109			293.656	3.21208			608	294.388			293.564	3.13201			608	299.019			293.754	3.21711			608	295.197			293.524	3.20235			608	291.474			293.555	3.58504			608	288.745			293.714	3.351
		608.5	290.595			293.636	3.20922			608.5	289.783			293.558	3.13165			608.5	294.747			293.751	3.21271			608.5	295.902			293.512	3.20073			608.5	290.9			293.565	3.58308			608.5	294.917			293.716	3.34956
		609	295.087			293.636	3.20926			609	292.875			293.579	3.12032			609	294.853			293.796	3.23304			609	291.385			293.498	3.19631			609	288.803			293.535	3.55378			609	296.272			293.707	3.35178
		609.5	290.868			293.633	3.20822			609.5	292.227			293.576	3.12104			609.5	293.929			293.774	3.23355			609.5	291.88			293.493	3.20041			609.5	293.359			293.513	3.55522			609.5	292.104			293.71	3.35094
		610	296.678			293.646	3.20224			610	297.418			293.591	3.12159			610	293.934			293.771	3.22919			610	291.677			293.48	3.2132			610	296.608			293.525	3.55233			610	291.188			293.68	3.35226
		610.5	290.811			293.668	3.23745			610.5	293.405			293.547	3.129			610.5	295.111			293.739	3.25129			610.5	288.823			293.509	3.22321			610.5	291.137			293.544	3.54866			610.5	294.413			293.677	3.35265
		611	292.689			293.644	3.27549			611	287.142			293.548	3.12898			611	293.842			293.749	3.25809			611	293.006			293.522	3.20946			611	291.791			293.572	3.53321			611	289.366			293.656	3.35799
		611.5	293.152			293.633	3.28262			611.5	300.581			293.559	3.10992			611.5	292.02			293.739	3.26086			611.5	295.761			293.518	3.21048			611.5	290.227			293.591	3.54203			611.5	296.877			293.682	3.33993
		612	296.355			293.631	3.28312			612	292.578			293.517	3.07128			612	291.718			293.745	3.26238			612	288.51			293.508	3.2066			612	295.334			293.57	3.53669			612	292.531			293.665	3.34238
		612.5	294.416			293.594	3.29351			612.5	293.48			293.52	3.07066			612.5	295.026			293.74	3.261			612.5	295.147			293.521	3.19154			612.5	293.185			293.548	3.56509			612.5	294.601			293.648	3.33779
		613	294.524			293.609	3.30415			613	296.892			293.533	3.07594			613	291.572			293.714	3.28107			613	291.835			293.539	3.20985			613	296.189			293.568	3.56657			613	296.742			293.676	3.34841
		613.5	292.276			293.585	3.31533			613.5	292.418			293.489	3.09041			613.5	293.532			293.745	3.29533			613.5	298.121			293.533	3.21415			613.5	294.917			293.584	3.55872			613.5	287.638			293.659	3.36891
		614	288.726			293.613	3.32849			614	295.999			293.51	3.09674			614	294.198			293.751	3.29276			614	291.439			293.492	3.20794			614	290.327			293.565	3.55943			614	297.251			293.665	3.37152
		614.5	297.216			293.64	3.3106			614.5	294.775			293.519	3.10785			614.5	288.658			293.726	3.30173			614.5	291.958			293.499	3.20488			614.5	294.055			293.568	3.55937			614.5	297.55			293.708	3.37111
		615	288.995			293.636	3.30663			615	290.603			293.503	3.1097			615	289.927			293.734	3.29854			615	294.904			293.517	3.20605			615	291.361			293.547	3.55627			615	290.548			293.671	3.37656
		615.5	290.213			293.665	3.29124			615.5	291.875			293.535	3.112			615.5	293.407			293.738	3.29879			615.5	291.106			293.498	3.20866			615.5	292.236			293.565	3.57262			615.5	295.966			293.674	3.3759
		616	292.949			293.678	3.28256			616	294.044			293.531	3.11467			616	293.43			293.754	3.30868			616	289.797			293.499	3.20781			616	297.827			293.556	3.58407			616	292.936			293.669	3.37527
		616.5	290.226			293.686	3.28253			616.5	289.816			293.516	3.11915			616.5	292.987			293.757	3.30443			616.5	299.286			293.53	3.20135			616.5	281.094			293.547	3.58485			616.5	296.917			293.666	3.37284
		617	295.509			293.696	3.27459			617	287.838			293.556	3.12286			617	295.615			293.783	3.29488			617	286.518			293.485	3.18267			617	297.999			293.567	3.58382			617	294.658			293.707	3.34915
		617.5	291.916			293.671	3.28072			617.5	290.988			293.559	3.11741			617.5	289.848			293.787	3.29495			617.5	298.304			293.513	3.14586			617.5	288.584			293.57	3.58295			617.5	290.44			293.692	3.3401
		618	292.424			293.686	3.27988			618	293.977			293.583	3.11643			618	289.433			293.774	3.30173			618	290.292			293.505	3.13556			618	289.915			293.551	3.57033			618	298.013			293.679	3.32985
		618.5	293.588			293.691	3.27872			618.5	294.925			293.577	3.11689			618.5	296.917			293.779	3.30127			618.5	291.381			293.509	3.1322			618.5	299.709			293.62	3.46058			618.5	292.554			293.698	3.3228
		619	292.883			293.695	3.27893			619	287.664			293.575	3.1162			619	292.182			293.781	3.30276			619	294.73			293.533	3.13503			619	291.091			293.591	3.44807			619	295.934			293.678	3.32105
		619.5	293.411			293.721	3.29343			619.5	296.79			293.608	3.08826			619.5	290.741			293.796	3.29161			619.5	287.929			293.515	3.13851			619.5	293.123			293.607	3.43193			619.5	294.87			293.68	3.32075
		620	290.937			293.711	3.2972			620	290.406			293.616	3.09853			620	290.574			293.783	3.3142			620	293.36			293.529	3.11992			620	296.821			293.64	3.42835			620	294.258			293.662	3.31296
		620.5	291.819			293.724	3.29138			620.5	293.851			293.617	3.09817			620.5	293.395			293.782	3.31337			620.5	289.063			293.511	3.13181			620.5	289.741			293.617	3.4028			620.5	301.574			293.648	3.31437
		621	299.033			293.755	3.3033			621	295.756			293.607	3.10055			621	293.299			293.772	3.3218			621	292.578			293.526	3.11767			621	301.415			293.62	3.40097			621	293.174			293.68	3.31383
		621.5	292.724			293.717	3.28611			621.5	291.26			293.596	3.09681			621.5	291.644			293.809	3.32945			621.5	297.974			293.517	3.12267			621.5	293.672			293.627	3.40147			621.5	293.862			293.639	3.31045
		622	293.246			293.74	3.29526			622	293.084			293.609	3.0924			622	287.494			293.818	3.32303			622	288.555			293.511	3.11549			622	290.579			293.587	3.41203			622	297.244			293.663	3.31985
		622.5	295.407			293.713	3.32225			622.5	291.754			293.603	3.09444			622.5	294.398			293.814	3.32404			622.5	295.696			293.516	3.10813			622.5	296.493			293.622	3.40885			622.5	287.105			293.671	3.32705
		623	292.079			293.707	3.32033			623	293.013			293.6	3.09659			623	293.293			293.8	3.33214			623	299.228			293.496	3.10712			623	292.724			293.581	3.36389			623	292.001			293.625	3.37395
		623.5	298.84			293.695	3.33067			623.5	293.111			293.571	3.1298			623.5	294.846			293.801	3.33141			623.5	290.351			293.478	3.08423			623.5	296.355			293.571	3.36665			623.5	294.944			293.629	3.37535
		624	290.336			293.694	3.32851			624	289.972			293.587	3.13578			624	291.53			293.843	3.30447			624	298.977			293.476	3.08687			624	295.411			293.598	3.364			624	293.562			293.596	3.32943
		624.5	292.876			293.694	3.32802			624.5	290.741			293.588	3.13506			624.5	294.687			293.827	3.30922			624.5	290.919			293.453	3.06295			624.5	286.66			293.564	3.36933			624.5	291.013			293.58	3.33981
		625	296.594			293.686	3.33213			625	291.967			293.619	3.13756			625	293.845			293.818	3.3132			625	293.531			293.469	3.05799			625	297.007			293.591	3.38517			625	287.487			293.601	3.35512
		625.5	290.284			293.692	3.33899			625.5	290.35			293.623	3.13579			625.5	296.752			293.826	3.31761			625.5	300.665			293.473	3.05848			625.5	294.133			293.566	3.3832			625.5	297.062			293.586	3.34545
		626	294.317			293.709	3.33024			626	293.365			293.621	3.13774			626	293.096			293.815	3.32862			626	290.185			293.445	3.01826			626	292.087			293.555	3.38076			626	292.819			293.597	3.32705
		626.5	295.519			293.715	3.33267			626.5	292.529			293.629	3.13911			626.5	293.653			293.845	3.3634			626.5	299.27			293.455	3.0111			626.5	299.485			293.598	3.34752			626.5	293.939			293.614	3.3275
		627	295.91			293.686	3.34274			627	298.276			293.641	3.13949			627	299.172			293.845	3.36342			627	294.51			293.415	2.98626			627	296.127			293.556	3.3575			627	294.728			293.608	3.32617
		627.5	298.263			293.674	3.33902			627.5	290.153			293.609	3.12508			627.5	296.513			293.815	3.36352			627.5	293.496			293.415	2.98609			627.5	290.913			293.547	3.35866			627.5	292.179			293.599	3.32841
		628	293.561			293.672	3.33579			628	295.295			293.635	3.11773			628	295.668			293.83	3.36665			628	296.589			293.426	2.99025			628	295.19			293.535	3.36767			628	292.145			293.631	3.33379
		628.5	290.421			293.657	3.34322			628.5	293.237			293.584	3.17249			628.5	288.299			293.821	3.36962			628.5	295.464			293.42	2.98535			628.5	290.581			293.515	3.34415			628.5	296.289			293.636	3.3246
		629	300.546			293.63	3.39053			629	292.407			293.598	3.1771			629	292.743			293.797	3.34841			629	292.781			293.425	2.98932			629	297.057			293.513	3.34239			629	287.065			293.616	3.31602
		629.5	290.608			293.6	3.35544			629.5	293.604			293.623	3.18795			629.5	294.761			293.798	3.3494			629.5	291.038			293.424	2.98939			629.5	296.377			293.541	3.34404			629.5	293.569			293.624	3.31597
		630	294.125			293.616	3.34875			630	289.077			293.62	3.18835			630	294.636			293.776	3.35171			630	295.733			293.42	2.99333			630	289.457			293.533	3.34199			630	289.964			293.585	3.35712
		630.5	295.993			293.604	3.351			630.5	294.683			293.668	3.19243			630.5	294.459			293.783	3.34167			630.5	294.66			293.4	2.99115			630.5	292.485			293.551	3.3358			630.5	286.696			293.572	3.35789
		631	286.777			293.602	3.3497			631	294.309			293.662	3.19163			631	296.538			293.774	3.34629			631	292.188			293.392	2.99001			631	293.025			293.53	3.32686			631	301.171			293.577	3.35655
		631.5	297.172			293.622	3.32044			631.5	292.759			293.663	3.19178			631.5	291.62			293.749	3.3576			631.5	291.312			293.377	3.00339			631.5	291.964			293.507	3.32294			631.5	291.364			293.577	3.35633
		632	291.467			293.592	3.31601			632	297.035			293.698	3.22099			632	293.916			293.761	3.36441			632	293.408			293.399	3.00492			632	303.338			293.534	3.3118			632	293.925			293.574	3.35371
		632.5	297.607			293.577	3.33136			632.5	291.694			293.679	3.21256			632.5	296.507			293.737	3.37672			632.5	294.473			293.371	3.03095			632.5	286.262			293.548	3.31312			632.5	297.352			293.601	3.32253
		633	294.769			293.563	3.32005			633	300.493			293.686	3.20966			633	291.101			293.722	3.3709			633	296.835			293.364	3.03012			633	299.402			293.568	3.32285			633	291.35			293.626	3.34024
		633.5	284.383			293.565	3.32106			633.5	288.682			293.655	3.17337			633.5	297.589			293.742	3.37069			633.5	291.4			293.357	3.02387			633.5	292.781			293.555	3.33526			633.5	291.182			293.616	3.3538
		634	299.293			293.584	3.2789			634	296.658			293.662	3.16377			634	294.611			293.732	3.3732			634	300.004			293.378	3.02508			634	295.133			293.517	3.26602			634	294.32			293.645	3.31848
		634.5	294.089			293.558	3.25408			634.5	293.725			293.654	3.15833			634.5	292.698			293.726	3.36931			634.5	290.705			293.358	2.9936			634.5	285.873			293.544	3.22751			634.5	289.038			293.616	3.27751
		635	289.6			293.559	3.25429			635	293.36			293.661	3.16008			635	296.695			293.743	3.36462			635	294.714			293.378	2.98963			635	289.535			293.526	3.2045			635	293.479			293.613	3.28013
		635.5	297.279			293.559	3.25462			635.5	296.388			293.655	3.16166			635.5	292.197			293.743	3.36393			635.5	295.816			293.369	2.9883			635.5	293.307			293.514	3.21197			635.5	294.644			293.615	3.28046
		636	289.551			293.536	3.24457			636	289.08			293.668	3.1777			636	294.024			293.762	3.3807			636	293.149			293.341	2.99169			636	294.803			293.514	3.21195			636	299.044			293.598	3.26982
		636.5	295.065			293.565	3.23484			636.5	292.386			293.661	3.18906			636.5	292.648			293.782	3.38603			636.5	298.524			293.355	2.99667			636.5	291.632			293.557	3.16668			636.5	294.399			293.598	3.26976
		637	298.225			293.562	3.23379			637	295.502			293.677	3.19072			637	291.871			293.766	3.37978			637	291.8			293.362	3.01055			637	296.846			293.564	3.15928			637	293.683			293.622	3.26933
		637.5	285.786			293.546	3.21844			637.5	295.767			293.666	3.18829			637.5	294.022			293.785	3.38156			637.5	286.198			293.385	3.01706			637.5	298.229			293.57	3.15991			637.5	294.564			293.603	3.27604
		638	297.317			293.584	3.17111			638	295.294			293.649	3.18589			638	288.468			293.787	3.38174			638	298.881			293.431	2.97662			638	284.282			293.552	3.16317			638	292.032			293.617	3.26242
		638.5	291.891			293.589	3.1785			638.5	290.868			293.655	3.18966			638.5	297.86			293.794	3.38083			638.5	289.201			293.408	2.95214			638.5	295.357			293.563	3.16032			638.5	289.244			293.618	3.26241
		639	294.323			293.599	3.17629			639	297.808			293.638	3.2141			639	291.58			293.805	3.37822			639	301.128			293.416	2.94252			639	298.874			293.539	3.15339			639	292.58			293.623	3.26496
		639.5	297.906			293.612	3.18454			639.5	291.935			293.65	3.23494			639.5	291.324			293.802	3.37828			639.5	292.188			293.366	2.89635			639.5	292.081			293.509	3.13719			639.5	293.98			293.617	3.25607
		640	293.261			293.599	3.17194			640	292.053			293.642	3.24091			640	295.293			293.827	3.35723			640	291.514			293.394	2.91325			640	296.162			293.563	3.0699			640	294.033			293.639	3.27505
		640.5	292.263			293.599	3.17192			640.5	293.087			293.635	3.24656			640.5	289.419			293.808	3.34514			640.5	295.491			293.421	2.92028			640.5	291.534			293.558	3.06799			640.5	295.703			293.643	3.27581
		641	293.243			293.605	3.17054			641	289.011			293.651	3.25185			641	297.966			293.836	3.34941			641	292.34			293.437	2.94119			641	292.771			293.531	3.04478			641	293.885			293.666	3.29832
		641.5	291.132			293.622	3.17764			641.5	296.052			293.66	3.24147			641.5	292.244			293.858	3.3472			641.5	289.232			293.451	2.94246			641.5	295.292			293.529	3.04593			641.5	294.929			293.693	3.30645
		642	290.988			293.623	3.17682			642	290.064			293.634	3.24318			642	293.272			293.844	3.34684			642	295.182			293.486	2.93413			642	288.966			293.517	3.04024			642	296.577			293.714	3.29139
		642.5	285.514			293.63	3.17223			642.5	295.99			293.669	3.24256			642.5	299.195			293.867	3.33213			642.5	287.609			293.484	2.93296			642.5	293.778			293.511	3.0449			642.5	294.356			293.754	3.32579
		643	290.469			293.713	3.1757			643	301.805			293.617	3.2868			643	292.765			293.845	3.31955			643	293.547			293.515	2.90336			643	294.869			293.517	3.04453			643	299.685			293.717	3.36351
		643.5	298.571			293.715	3.17384			643.5	291.803			293.593	3.24402			643.5	294.994			293.856	3.31787			643.5	296.995			293.518	2.90358			643.5	291.109			293.52	3.04723			643.5	288.131			293.719	3.36383
		644	291.927			293.687	3.15561			644	295.77			293.598	3.24211			644	300.63			293.825	3.35277			644	289.303			293.485	2.90121			644	293.065			293.523	3.04292			644	297.62			293.734	3.37832
		644.5	295.33			293.69	3.15396			644.5	293.897			293.583	3.23909			644.5	294.306			293.802	3.33168			644.5	295.729			293.535	2.91607			644.5	290.405			293.544	3.05918			644.5	296.121			293.702	3.40581
		645	300.825			293.682	3.15182			645	290.155			293.572	3.24151			645	293.256			293.818	3.33456			645	288.672			293.512	2.91686			645	293.907			293.528	3.06081			645	295.755			293.703	3.40618
		645.5	285.578			293.66	3.11669			645.5	293.212			293.56	3.25906			645.5	295.392			293.811	3.33361			645.5	299.373			293.545	2.89894			645.5	297.221			293.535	3.0569			645.5	300.5			293.676	3.405
		646	295.89			293.676	3.08347			646	290.609			293.573	3.26273			646	294.431			293.781	3.29884			646	290.724			293.514	2.86948			646	287.829			293.55	3.06228			646	292.992			293.678	3.40548
		646.5	294.855			293.659	3.08058			646.5	285.992			293.597	3.25863			646.5	294.763			293.772	3.29986			646.5	291.829			293.527	2.86266			646.5	295.686			293.553	3.05968			646.5	295.983			293.67	3.39293
		647	297.37			293.647	3.08074			647	297.136			293.617	3.22336			647	297.681			293.786	3.30394			647	295.229			293.542	2.86128			647	288.439			293.567	3.0679			647	293.145			293.673	3.38842
		647.5	295.392			293.636	3.07161			647.5	287.403			293.624	3.2314			647.5	290.216			293.771	3.30351			647.5	291.553			293.542	2.86174			647.5	299.354			293.572	3.07469			647.5	287.431			293.652	3.37687
		648	290.241			293.626	3.06919			648	295.763			293.637	3.21061			648	295.051			293.79	3.31836			648	293.613			293.569	2.86825			648	294.297			293.6	3.04765			648	298.975			293.639	3.37236
		648.5	296.769			293.615	3.08491			648.5	292.681			293.636	3.20976			648.5	294.342			293.768	3.32611			648.5	294.81			293.569	2.86825			648.5	292.014			293.613	3.0628			648.5	291.63			293.645	3.37765
		649	292.954			293.63	3.10803			649	292.498			293.662	3.22373			649	286.862			293.762	3.31935			649	294.719			293.57	2.86874			649	293.39			293.619	3.05467			649	293.546			293.608	3.3428
		649.5	293.737			293.609	3.1273			649.5	295.087			293.659	3.22518			649.5	300.571			293.791	3.31386			649.5	291.041			293.572	2.86983			649.5	291.695			293.577	3.03343			649.5	294.769			293.607	3.34296
		650	293.476			293.609	3.12733			650	293.271			293.667	3.23016			650	291.264			293.787	3.31278			650	294.969			293.608	2.8838			650	288.548			293.574	3.03302			650	297.506			293.605	3.34177
		650.5	291.108			293.605	3.12799			650.5	293.804			293.671	3.23025			650.5	294.31			293.777	3.31376			650.5	297.157			293.606	2.88304			650.5	295.998			293.543	3.07875			650.5	295.782			293.605	3.34185
		651	290.975			293.611	3.12439			651	298.466			293.659	3.23405			651	296.158			293.802	3.28012			651	291.933			293.572	2.8819			651	289.612			293.566	3.09359			651	296.375			293.634	3.31314
		651.5	294.903			293.629	3.11958			651.5	291.041			293.662	3.23812			651.5	291.742			293.742	3.26636			651.5	287.894			293.589	2.88261			651.5	295.974			293.599	3.10997			651.5	294.604			293.619	3.29558
		652	297.748			293.619	3.1188			652	292.395			293.663	3.23754			652	292.418			293.762	3.26355			652	296.957			293.572	2.9266			652	289.069			293.611	3.09504			652	293.702			293.632	3.29293
		652.5	289.321			293.612	3.11162			652.5	295.864			293.638	3.26663			652.5	300.107			293.728	3.29359			652.5	290.378			293.563	2.91861			652.5	291.13			293.629	3.11855			652.5	292.853			293.646	3.29835
		653	299.428			293.642	3.09886			653	296.248			293.62	3.26407			653	283.636			293.717	3.2891			653	291.697			293.553	2.93283			653	294.307			293.64	3.10789			653	296.224			293.639	3.29744
		653.5	296.588			293.593	3.08508			653.5	296.667			293.594	3.26419			653.5	300.731			293.742	3.29269			653.5	293.702			293.581	2.94268			653.5	288.286			293.61	3.11419			653.5	289.525			293.637	3.29529
		654	293.515			293.588	3.08127			654	293.118			293.547	3.28782			654	293.594			293.764	3.29895			654	291.082			293.585	2.94325			654	297.392			293.658	3.11702			654	296.255			293.643	3.30004
		654.5	297.177			293.559	3.10888			654.5	302.931			293.557	3.2895			654.5	293.093			293.747	3.27502			654.5	294.905			293.582	2.94596			654.5	289.522			293.647	3.12967			654.5	290.987			293.651	3.30836
		655	291.375			293.553	3.10289			655	292.118			293.48	3.24937			655	299.363			293.798	3.19564			655	293.765			293.583	2.94624			655	293.526			293.665	3.14404			655	294.261			293.644	3.30775
		655.5	293.107			293.548	3.10743			655.5	296.401			293.459	3.27161			655.5	291.596			293.747	3.16643			655.5	290.646			293.571	2.95002			655.5	301.42			293.692	3.12083			655.5	294.768			293.635	3.31001
		656	297.366			293.562	3.11154			656	294.18			293.456	3.2693			656	298.938			293.737	3.17014			656	298.54			293.573	2.94794			656	290.114			293.663	3.11314			656	289.859			293.645	3.31045
		656.5	288.162			293.543	3.09986			656.5	295.171			293.455	3.26904			656.5	293.866			293.724	3.17871			656.5	293.619			293.55	2.92689			656.5	290.939			293.692	3.10116			656.5	298.272			293.615	3.31358
		657	295.833			293.585	3.08284			657	293.82			293.473	3.28881			657	285.498			293.707	3.15808			657	297.836			293.551	2.92694			657	299.569			293.672	3.11448			657	291.809			293.649	3.30585
		657.5	292.198			293.562	3.0828			657.5	293.971			293.444	3.31161			657.5	298.653			293.718	3.15454			657.5	290.697			293.519	2.91448			657.5	294.688			293.61	3.08313			657.5	294.107			293.624	3.30454
		658	294.038			293.556	3.08634			658	292.921			293.47	3.33697			658	286.999			293.672	3.14641			658	294.703			293.534	2.90761			658	295.011			293.632	3.07377			658	295.227			293.651	3.30452
		658.5	297.631			293.554	3.08616			658.5	294.513			293.474	3.33675			658.5	293.538			293.659	3.15098			658.5	294.313			293.516	2.9113			658.5	290.772			293.625	3.08146			658.5	294.509			293.664	3.31186
		659	291.773			293.496	3.11819			659	292.819			293.469	3.33596			659	292.479			293.694	3.09845			659	292.916			293.525	2.91635			659	294.364			293.6	3.05323			659	288.71			293.648	3.31414
		659.5	300.688			293.503	3.11587			659.5	295.567			293.488	3.34243			659.5	290.267			293.644	3.09936			659.5	288.609			293.502	2.93999			659.5	297.092			293.599	3.053			659.5	297.554			293.662	3.30385
		660	291.673			293.464	3.07423			660	291.669			293.435	3.39142			660	297.994			293.671	3.06462			660	297.109			293.518	2.9218			660	292.628			293.583	3.05398			660	295.033			293.642	3.28789
		660.5	293.666			293.494	3.08627			660.5	291.971			293.451	3.3904			660.5	291.971			293.679	3.06675			660.5	288.838			293.518	2.92159			660.5	294.884			293.607	3.05034			660.5	291.498			293.655	3.28577
		661	294.218			293.496	3.08644			661	293.621			293.483	3.40742			661	295.961			293.706	3.07899			661	295.709			293.555	2.90883			661	290.352			293.587	3.05791			661	294.934			293.622	3.31349
		661.5	292.892			293.487	3.08693			661.5	289.958			293.459	3.42438			661.5	291.379			293.714	3.07192			661.5	296.799			293.534	2.90779			661.5	292.846			293.569	3.04786			661.5	293.591			293.618	3.31195
		662	293.199			293.481	3.08937			662	292.308			293.474	3.41548			662	295.921			293.692	3.05691			662	291.541			293.526	2.90055			662	295.088			293.599	3.06886			662	299.786			293.609	3.31211
		662.5	289.397			293.476	3.09053			662.5	294.084			293.471	3.41687			662.5	296.516			293.728	3.07847			662.5	299.813			293.554	2.90872			662.5	295.407			293.59	3.06782			662.5	293.688			293.644	3.29727
		663	298.374			293.486	3.08036			663	292.262			293.442	3.43564			663	289.266			293.693	3.09186			663	293.254			293.541	2.88611			663	299.452			293.602	3.0598			663	295.971			293.622	3.28574
		663.5	292.239			293.463	3.06087			663.5	294.456			293.451	3.43478			663.5	291.87			293.72	3.09522			663.5	292.978			293.553	2.89009			663.5	291.679			293.614	3.06174			663.5	296.944			293.635	3.2963
		664	294.414			293.476	3.06105			664	290.615			293.472	3.45385			664	297.068			293.697	3.09619			664	297.631			293.564	2.89228			664	295.748			293.597	3.06281			664	297.281			293.639	3.29404
		664.5	294.801			293.464	3.06187			664.5	293.566			293.49	3.44844			664.5	287.954			293.652	3.12018			664.5	292.217			293.524	2.89206			664.5	290.976			293.6	3.06485			664.5	291.027			293.649	3.30101
		665	289.784			293.45	3.06211			665	292.45			293.508	3.45835			665	302.578			293.703	3.13161			665	294.014			293.546	2.89889			665	296.28			293.576	3.03765			665	294.84			293.658	3.30299
		665.5	295.629			293.488	3.06297			665.5	289.689			293.499	3.46384			665.5	293.219			293.699	3.13441			665.5	297.552			293.565	2.91442			665.5	294.415			293.579	3.03645			665.5	292.651			293.614	3.27947
		666	292.724			293.486	3.06173			666	296.029			293.541	3.46882			666	295.269			293.665	3.13538			666	287.263			293.539	2.90177			666	291.274			293.539	3.0607			666	295.301			293.605	3.28156
		666.5	293.229			293.469	3.07586			666.5	296.84			293.544	3.47085			666.5	292.994			293.695	3.10925			666.5	294.979			293.572	2.86758			666.5	293.082			293.559	3.05708			666.5	299.594			293.589	3.2778
		667	298.444			293.478	3.078			667	296.117			293.549	3.47634			667	288.858			293.627	3.06307			667	292.234			293.568	2.86606			667	288.383			293.543	3.05113			667	297.912			293.588	3.27656
		667.5	294.711			293.461	3.0597			667.5	288.797			293.568	3.50148			667.5	302.316			293.634	3.06371			667.5	292.583			293.575	2.8645			667.5	294.399			293.551	3.05569			667.5	291.5			293.573	3.26636
		668	293.276			293.439	3.06614			668	294.491			293.557	3.52019			668	296.675			293.63	3.06207			668	291.197			293.566	2.87022			668	295.467			293.56	3.05163			668	288.611			293.569	3.26968
		668.5	289.216			293.449	3.06869			668.5	292.719			293.541	3.52321			668.5	289.741			293.609	3.08001			668.5	290.651			293.592	2.87206			668.5	293.964			293.589	3.07383			668.5	287.54			293.57	3.26999
		669	295.287			293.448	3.07023			669	292.235			293.559	3.528			669	296.444			293.642	3.06425			669	293.436			293.613	2.86576			669	298.585			293.616	3.05171			669	293.135			293.57	3.27002
		669.5	292.177			293.45	3.07194			669.5	294.845			293.568	3.52694			669.5	289.66			293.551	3.07713			669.5	288.046			293.629	2.8738			669.5	292.26			293.618	3.05231			669.5	291.227			293.55	3.27126
		670	293.055			293.451	3.07178			670	292.496			293.606	3.58307			670	299.745			293.561	3.09039			670	295.154			293.66	2.84685			670	296.34			293.615	3.05054			670	296.281			293.532	3.24724
		670.5	292.664			293.471	3.08226			670.5	293.056			293.591	3.59466			670.5	294.128			293.582	3.07858			670.5	294.512			293.653	2.8449			670.5	288.06			293.603	3.05395			670.5	295.199			293.511	3.23242
		671	292.49			293.468	3.08303			671	291.804			293.574	3.60508			671	289.038			293.566	3.07196			671	297.573			293.631	2.85539			671	296.248			293.619	3.08894			671	293.592			293.526	3.23008
		671.5	286.65			293.473	3.08226			671.5	294.308			293.611	3.62516			671.5	294.824			293.604	3.07069			671.5	294.699			293.653	2.90074			671.5	293.49			293.618	3.08952			671.5	295.995			293.551	3.21124
		672	297.89			293.509	3.04422			672	291.071			293.563	3.68083			672	292.063			293.567	3.04105			672	293.065			293.643	2.90053			672	286.095			293.618	3.08942			672	293.853			293.544	3.22593
		672.5	295.635			293.499	3.03314			672.5	292.037			293.609	3.70827			672.5	293.616			293.56	3.04131			672.5	292.748			293.644	2.90029			672.5	299.471			293.642	3.06448			672.5	297.558			293.567	3.23912
		673	293.635			293.51	3.0444			673	293.624			293.613	3.70695			673	295.396			293.588	3.02534			673	290.472			293.655	2.90104			673	286.01			293.633	3.05934			673	298.039			293.589	3.23812
		673.5	292.04			293.489	3.05752			673.5	285.647			293.603	3.70965			673.5	294.705			293.562	3.03694			673.5	292.667			293.674	2.89258			673.5	298.429			293.634	3.05933			673.5	287.825			293.573	3.23257
		674	290.196			293.505	3.05841			674	296.168			293.652	3.66867			674	292.505			293.568	3.03514			674	296.263			293.704	2.91228			674	293.165			293.69	3.0237			674	296.649			293.571	3.23149
		674.5	291.806			293.522	3.0494			674.5	292.121			293.625	3.67036			674.5	295.346			293.57	3.03531			674.5	296.35			293.677	2.913			674.5	288.041			293.648	3.00166			674.5	298.148			293.548	3.24792
		675	290.847			293.514	3.0563			675	296.009			293.644	3.67275			675	293.633			293.543	3.04329			675	296.087			293.65	2.91414			675	294.808			293.712	2.97408			675	290.805			293.533	3.24345
		675.5	295.465			293.534	3.05193			675.5	299.146			293.627	3.66978			675.5	294.162			293.546	3.0446			675.5	290.7			293.625	2.91389			675.5	289.566			293.663	2.97694			675.5	295.679			293.521	3.24698
		676	292.46			293.518	3.05009			676	290.695			293.571	3.66993			676	291.439			293.541	3.04678			676	293.162			293.637	2.90674			676	298.044			293.691	2.99923			676	289.725			293.501	3.23436
		676.5	288.59			293.538	3.05634			676.5	299.62			293.617	3.69131			676.5	293.939			293.517	3.05155			676.5	297.178			293.647	2.90829			676.5	291.304			293.705	2.97976			676.5	291.716			293.492	3.22414
		677	296.629			293.585	3.05206			677	295.839			293.558	3.68963			677	291.772			293.514	3.05172			677	295.633			293.613	2.90704			677	292.334			293.694	2.97961			677	295.051			293.528	3.20066
		677.5	294.018			293.566	3.04482			677.5	297.444			293.534	3.69048			677.5	296.12			293.488	3.06929			677.5	293.569			293.583	2.91648			677.5	295.331			293.752	3.01235			677.5	291.426			293.517	3.1936
		678	292.729			293.588	3.06437			678	295.333			293.531	3.68781			678	294.443			293.495	3.06612			678	296.697			293.606	2.93381			678	295.859			293.728	2.99713			678	295.202			293.519	3.19786
		678.5	294.062			293.577	3.07178			678.5	293.062			293.502	3.69738			678.5	289.252			293.474	3.07786			678.5	289.177			293.57	2.93945			678.5	296.319			293.741	2.99224			678.5	289.892			293.51	3.20817
		679	296.353			293.581	3.07306			679	291.928			293.506	3.69733			679	291.476			293.499	3.08497			679	293.915			293.619	2.94713			679	294.448			293.76	2.99497			679	298.763			293.493	3.20583
		679.5	294.384			293.581	3.07259			679.5	299.385			293.486	3.71574			679.5	293.808			293.491	3.08022			679.5	295.048			293.595	2.96448			679.5	289.146			293.743	2.99537			679.5	296.38			293.54	3.21968
		680	295.763			293.581	3.0727			680	290.972			293.469	3.69604			680	287.659			293.475	3.08383			680	290.291			293.582	2.96363			680	290.47			293.739	2.99288			680	284.631			293.552	3.21744
		680.5	294.795			293.56	3.07249			680.5	298.289			293.48	3.69184			680.5	296.311			293.508	3.07397			680.5	292.327			293.614	2.96219			680.5	298.029			293.735	2.98986			680.5	294.875			293.558	3.22065
		681	292.5			293.538	3.07892			681	291.468			293.441	3.68249			681	295.048			293.523	3.07133			681	290.278			293.598	2.97681			681	287.434			293.727	2.98993			681	291.201			293.562	3.21846
		681.5	294.507			293.545	3.07814			681.5	297.567			293.456	3.68057			681.5	292.828			293.513	3.07383			681.5	297.687			293.625	2.97095			681.5	293.168			293.767	2.98154			681.5	293.371			293.557	3.21681
		682	296.498			293.541	3.07739			682	296.857			293.418	3.67748			682	296.654			293.565	3.0631			682	292.486			293.599	2.95813			682	293.639			293.78	2.97275			682	294.607			293.585	3.20931
		682.5	291.512			293.522	3.07077			682.5	291.684			293.431	3.69521			682.5	293.89			293.529	3.07279			682.5	292.377			293.596	2.95972			682.5	292.806			293.72	3.00703			682.5	294.486			293.551	3.19031
		683	292.359			293.546	3.07436			683	296.578			293.442	3.69326			683	297.302			293.57	3.14457			683	294.989			293.628	2.9825			683	294.94			293.793	3.03041			683	292.122			293.552	3.1908
		683.5	295.867			293.53	3.08996			683.5	288.209			293.405	3.69882			683.5	299.382			293.561	3.14858			683.5	294.285			293.608	2.98732			683.5	292.321			293.804	3.03201			683.5	291.679			293.6	3.1278
		684	297.977			293.523	3.08621			684	291.08			293.464	3.70953			684	289.153			293.538	3.14273			684	289.155			293.598	2.9885			684	293.836			293.821	3.04091			684	286.98			293.604	3.13
		684.5	294.512			293.513	3.07493			684.5	296.281			293.463	3.70991			684.5	293.185			293.538	3.14269			684.5	294.149			293.625	2.97268			684.5	296.667			293.83	3.04067			684.5	301.385			293.632	3.13444
		685	297.133			293.477	3.10405			685	294.172			293.434	3.71036			685	294.735			293.517	3.13146			685	293.378			293.595	2.99632			685	296.745			293.819	3.04087			685	291.864			293.64	3.13547
		685.5	293.676			293.48	3.108			685.5	294.102			293.453	3.72355			685.5	292.633			293.491	3.10399			685.5	293.311			293.62	3.01435			685.5	295.074			293.86	3.07638			685.5	293.625			293.638	3.13505
		686	290.049			293.466	3.11413			686	291.829			293.444	3.72418			686	295.111			293.535	3.10547			686	296.577			293.636	3.02119			686	291.703			293.861	3.07643			686	298.61			293.637	3.13488
		686.5	298.113			293.481	3.10478			686.5	293.191			293.486	3.75229			686.5	287.496			293.552	3.11301			686.5	292.386			293.586	3.05412			686.5	296.678			293.816	3.1013			686.5	289.863			293.663	3.1432
		687	289.237			293.479	3.10194			687	284.507			293.48	3.75343			687	296.615			293.586	3.16168			687	302.412			293.594	3.05308			687	292.934			293.831	3.12217			687	300.941			293.673	3.14008
		687.5	295.349			293.457	3.14824			687.5	300.186			293.531	3.69994			687.5	291.532			293.563	3.18476			687.5	290.164			293.551	2.98843			687.5	288.796			293.789	3.16219			687.5	292.289			293.7	3.10553
		688	293.136			293.469	3.16007			688	293.727			293.511	3.6749			688	294.595			293.555	3.18288			688	290.025			293.555	2.98457			688	296.366			293.806	3.16			688	293.816			293.665	3.05782
		688.5	295.869			293.476	3.16112			688.5	290.387			293.492	3.68328			688.5	293.378			293.577	3.15592			688.5	300.211			293.578	2.97491			688.5	293.878			293.789	3.15363			688.5	292.373			293.674	3.05516
		689	299.498			293.471	3.15798			689	293.459			293.508	3.6767			689	291.057			293.55	3.15333			689	293.355			293.539	2.93846			689	288.732			293.766	3.17587			689	293.445			293.65	3.07332
		689.5	291.509			293.45	3.13142			689.5	293.176			293.495	3.68131			689.5	297.028			293.553	3.15157			689.5	298.339			293.525	2.94596			689.5	297.592			293.81	3.16756			689.5	293.283			293.633	3.05506
		690	290.788			293.446	3.13414			690	294.526			293.501	3.68164			690	295.367			293.527	3.16442			690	290.631			293.512	2.93039			690	288.032			293.779	3.17298			690	293.981			293.651	3.04339
		690.5	299.07			293.453	3.1299			690.5	292.622			293.502	3.682			690.5	291.06			293.509	3.17558			690.5	291.634			293.515	2.9283			690.5	293.685			293.783	3.17362			690.5	287.056			293.618	2.99954
		691	288.773			293.428	3.10484			691	290.993			293.485	3.69336			691	293.136			293.529	3.17279			691	292.701			293.526	2.92537			691	296.649			293.833	3.17307			691	297.042			293.633	3.0007
		691.5	293.967			293.432	3.09967			691.5	297.462			293.51	3.69334			691.5	292.64			293.483	3.18789			691.5	294.348			293.522	2.92695			691.5	292.099			293.79	3.17982			691.5	292.349			293.593	3.05081
		692	297.837			293.426	3.09973			692	288.643			293.488	3.6828			692	290.582			293.487	3.19035			692	296.913			293.502	2.93457			692	295.298			293.814	3.15433			692	289.799			293.606	3.05082
		692.5	293.053			293.414	3.0875			692.5	292.529			293.491	3.67904			692.5	289.007			293.506	3.18733			692.5	291.771			293.489	2.92512			692.5	295.027			293.816	3.1544			692.5	298.153			293.606	3.0508
		693	295.849			293.426	3.09054			693	290.031			293.504	3.68022			693	291.901			293.492	3.19516			693	292.047			293.495	2.92283			693	292.282			293.792	3.15136			693	293.242			293.621	3.05649
		693.5	289.714			293.388	3.10792			693.5	295.018			293.512	3.67455			693.5	295.23			293.501	3.19526			693.5	296.229			293.507	2.9219			693.5	294.016			293.821	3.16254			693.5	296.214			293.628	3.05893
		694	293.003			293.425	3.10867			694	295.577			293.528	3.68845			694	291.487			293.522	3.18992			694	294.492			293.527	2.95442			694	293.502			293.801	3.1658			694	293.155			293.637	3.04167
		694.5	297.359			293.438	3.11189			694.5	289.619			293.519	3.6856			694.5	297.62			293.55	3.1746			694.5	293.399			293.499	2.97304			694.5	297.869			293.819	3.18283			694.5	291.461			293.641	3.04655
		695	293.514			293.412	3.10048			695	297.528			293.539	3.67524			695	291.201			293.542	3.18034			695	295.821			293.513	2.97913			695	292.045			293.822	3.18173			695	292.933			293.617	3.07573
		695.5	295.818			293.419	3.10237			695.5	287.188			293.538	3.67388			695.5	295.001			293.535	3.17812			695.5	293.076			293.476	2.99592			695.5	299.729			293.802	3.19238			695.5	289.933			293.65	3.0703
		696	289.476			293.395	3.10293			696	295.302			293.572	3.64642			696	296.865			293.537	3.17702			696	294.413			293.473	2.99652			696	296.964			293.818	3.19918			696	290.308			293.614	3.06011
		696.5	297.246			293.419	3.09103			696.5	292.725			293.557	3.64556			696.5	292.893			293.502	3.17062			696.5	290.902			293.495	3.01903			696.5	288.73			293.784	3.19233			696.5	296.466			293.598	3.07096
		697	293.382			293.414	3.0858			697	295.709			293.585	3.6613			697	297.402			293.492	3.18107			697	295.782			293.48	3.03876			697	294.01			293.786	3.19151			697	286.081			293.615	3.09637
		697.5	290.436			293.413	3.08581			697.5	297.522			293.544	3.685			697.5	293.362			293.481	3.17959			697.5	296.109			293.499	3.06453			697.5	291.458			293.769	3.16867			697.5	298.967			293.607	3.09993
		698	295.478			293.436	3.08054			698	296.734			293.552	3.69581			698	294.217			293.488	3.18829			698	291.776			293.506	3.0722			698	293.302			293.699	3.25048			698	291.049			293.616	3.09625
		698.5	289.82			293.396	3.10679			698.5	297.095			293.565	3.7123			698.5	296.714			293.498	3.18973			698.5	294.701			293.52	3.07073			698.5	302.469			293.708	3.23962			698.5	291.088			293.612	3.09787
		699	293.437			293.422	3.09891			699	296.23			293.523	3.71978			699	294.83			293.482	3.17804			699	285.656			293.54	3.09037			699	292.752			293.682	3.25829			699	293.295			293.622	3.08917
		699.5	293.188			293.42	3.09913			699.5	290.212			293.543	3.74537			699.5	291.424			293.492	3.18093			699.5	298.969			293.56	3.05101			699.5	291.182			293.68	3.25973			699.5	289.196			293.653	3.08726
		700	287.943			293.418	3.09935			700	294.953			293.523	3.77388			700	294.275			293.463	3.20163			700	287.869			293.539	3.02787			700	294.68			293.708	3.2806			700	300.951			293.637	3.08097
		700.5	303.272			293.469	3.09408			700.5	294.521			293.51	3.77357			700.5	291.51			293.489	3.25145			700.5	296.549			293.558	3.00383			700.5	292.12			293.636	3.24553			700.5	293.194			293.668	3.03542
		701	288.128			293.393	3.0391			701	292.166			293.525	3.78314			701	292.288			293.463	3.26199			701	295.822			293.536	2.99803			701	292.565			293.645	3.24545			701	289.588			293.642	3.01208
		701.5	292.94			293.417	3.01643			701.5	295.989			293.509	3.79471			701.5	297.109			293.465	3.2608			701.5	292.14			293.526	2.99376			701.5	292.339			293.669	3.24509			701.5	297.857			293.644	3.01006
		702	295.366			293.407	3.02083			702	292.032			293.517	3.80161			702	298.29			293.465	3.26069			702	297.669			293.515	3.0038			702	295.425			293.641	3.26012			702	285.449			293.678	3.01859
		702.5	291.708			293.408	3.0215			702.5	290.614			293.518	3.80139			702.5	296.124			293.458	3.26663			702.5	292.33			293.491	2.98959			702.5	296.549			293.683	3.29347			702.5	295.313			293.672	3.02035
		703	293.67			293.413	3.01967			703	300.687			293.526	3.7968			703	296.459			293.471	3.26742			703	294.191			293.518	3.00323			703	291.281			293.69	3.29258			703	292.172			293.705	3.0072
		703.5	298.034			293.427	3.02771			703.5	292.966			293.546	3.84486			703.5	291.349			293.438	3.26414			703.5	295.404			293.504	3.00639			703.5	294.968			293.683	3.29699			703.5	291.753			293.664	2.96367
		704	291.28			293.415	3.01417			704	299.48			293.506	3.89264			704	293.408			293.42	3.24727			704	287.635			293.49	3.0043			704	299.38			293.686	3.2989			704	293.712			293.664	2.96365
		704.5	291.555			293.438	3.01531			704.5	292.669			293.493	3.87667			704.5	290.313			293.412	3.2425			704.5	291.209			293.526	2.97725			704.5	295.445			293.654	3.30184			704.5	288.016			293.652	2.98636
		705	295.1			293.445	3.01253			705	292.977			293.524	3.89454			705	289.282			293.426	3.26218			705	292.715			293.532	2.97387			705	288.679			293.678	3.30219			705	296.611			293.628	2.97169
		705.5	292.971			293.442	3.01121			705.5	290.796			293.493	3.92258			705.5	289.733			293.45	3.26471			705.5	293.584			293.522	2.98009			705.5	296.627			293.679	3.30272			705.5	292.287			293.662	2.91611
		706	294.411			293.468	3.02901			706	290.433			293.536	3.9403			706	302.099			293.455	3.26519			706	290.683			293.522	2.9801			706	291.892			293.622	3.30314			706	291.98			293.651	2.91398
		706.5	295.21			293.45	3.03375			706.5	292.38			293.541	3.93733			706.5	291.883			293.471	3.25761			706.5	295.05			293.566	3.00331			706.5	298.83			293.63	3.30978			706.5	292.968			293.662	2.91251
		707	295.194			293.459	3.04139			707	297.804			293.53	3.94374			707	299.052			293.486	3.24533			707	291.354			293.531	3.02645			707	293.907			293.645	3.29456			707	290.59			293.679	2.91123
		707.5	289.119			293.469	3.05088			707.5	294.358			293.517	3.93411			707.5	299.734			293.485	3.24616			707.5	295.885			293.542	3.02251			707.5	293.896			293.654	3.30533			707.5	292.959			293.66	2.92427
		708	296.574			293.474	3.04517			708	301.625			293.491	3.94589			708	291.482			293.434	3.19038			708	290.009			293.521	3.02101			708	291.096			293.66	3.30322			708	290.74			293.675	2.90205
		708.5	292.098			293.467	3.03969			708.5	293.081			293.47	3.91356			708.5	298.451			293.48	3.23612			708.5	292.654			293.512	3.0339			708.5	293.806			293.651	3.29154			708.5	293.901			293.677	2.9039
		709	290.585			293.467	3.03946			709	293.978			293.492	3.92349			709	288.311			293.458	3.21286			709	293.2			293.54	3.05246			709	294.846			293.689	3.3399			709	291.478			293.681	2.9025
		709.5	294.512			293.475	3.03421			709.5	292.4			293.48	3.92585			709.5	296.919			293.439	3.18661			709.5	290.382			293.532	3.05579			709.5	294.419			293.667	3.35284			709.5	292.809			293.697	2.90184
		710	293.541			293.487	3.04363			710	295.174			293.488	3.92543			710	291.835			293.463	3.19026			710	289.128			293.538	3.05065			710	297.122			293.706	3.36721			710	297.739			293.704	2.9018
		710.5	301.038			293.495	3.04587			710.5	288.662			293.468	3.92753			710.5	295.163			293.427	3.17481			710.5	297.517			293.56	3.03459			710.5	292.314			293.699	3.36832			710.5	287.864			293.694	2.91584
		711	286.064			293.469	3.00326			711	293.477			293.475	3.91974			711	294.016			293.448	3.1545			711	291.435			293.524	3.02997			711	286.762			293.665	3.39085			711	295.683			293.725	2.93998
		711.5	290.435			293.515	2.9596			711.5	289.392			293.471	3.92025			711.5	288.601			293.426	3.14588			711.5	292.268			293.562	3.05157			711.5	295.846			293.666	3.39106			711.5	297.944			293.737	2.93259
		712	292.692			293.536	2.95273			712	292.184			293.475	3.91616			712	298.386			293.428	3.14479			712	293.795			293.567	3.05025			712	293.412			293.621	3.40589			712	289.504			293.76	2.95153
		712.5	289.009			293.539	2.95218			712.5	293.166			293.503	3.92665			712.5	292.891			293.397	3.15818			712.5	291.113			293.583	3.0597			712.5	291.546			293.65	3.4204			712.5	293.032			293.752	2.95969
		713	297.436			293.551	2.93867			713	296.075			293.495	3.92889			713	290.066			293.393	3.15789			713	298.634			293.62	3.0735			713	293.811			293.681	3.3858			713	293.54			293.758	2.95902
		713.5	289.64			293.514	2.93578			713.5	288.1			293.486	3.92507			713.5	293.062			293.412	3.14054			713.5	290.633			293.576	3.06398			713.5	291.973			293.645	3.40133			713.5	296.151			293.746	2.94766
		714	297.985			293.526	2.92513			714	296.498			293.517	3.90686			714	294.341			293.367	3.13335			714	289.87			293.603	3.06152			714	298.572			293.691	3.46241			714	295.862			293.768	2.92003
		714.5	294.131			293.472	2.94106			714.5	297.983			293.511	3.90338			714.5	297.39			293.39	3.14667			714.5	292.944			293.608	3.05614			714.5	288.379			293.697	3.45976			714.5	294.409			293.755	2.91733
		715	296.385			293.471	2.94075			715	291.538			293.481	3.89227			715	289.242			293.397	3.14094			715	295.483			293.599	3.06035			715	292.38			293.717	3.47188			715	294.808			293.734	2.90218
		715.5	294.818			293.452	2.93418			715.5	296.89			293.494	3.89018			715.5	295.239			293.403	3.14141			715.5	291.206			293.595	3.05833			715.5	295.384			293.716	3.47226			715.5	294.377			293.754	2.88672
		716	292.93			293.455	2.93644			716	291.07			293.466	3.88622			716	294.27			293.389	3.14307			716	291.345			293.594	3.05915			716	292.833			293.676	3.46296			716	291.993			293.792	2.92714
		716.5	294.389			293.456	2.93634			716.5	291.103			293.491	3.88703			716.5	290.769			293.377	3.13209			716.5	295.868			293.594	3.05932			716.5	293.939			293.701	3.44262			716.5	293.292			293.773	2.94009
		717	292.426			293.439	2.94042			717	297.835			293.497	3.88423			717	293.91			293.388	3.12152			717	290.419			293.572	3.05872			717	294.892			293.683	3.4584			717	293.229			293.763	2.93533
		717.5	290.312			293.456	2.94424			717.5	288.469			293.45	3.88886			717.5	296.089			293.367	3.12326			717.5	292.034			293.575	3.05613			717.5	292.186			293.693	3.46677			717.5	291.958			293.741	2.93592
		718	295.097			293.471	2.93587			718	295.907			293.49	3.87905			718	292.881			293.383	3.13682			718	296.68			293.589	3.05542			718	291.884			293.686	3.47004			718	296.775			293.73	2.93784
		718.5	293.408			293.457	2.9346			718.5	292.726			293.473	3.87587			718.5	286.803			293.412	3.13921			718.5	291.034			293.569	3.0481			718.5	296.597			293.666	3.48006			718.5	289.854			293.724	2.93685
		719	294.221			293.445	2.93945			719	294.558			293.465	3.87932			719	296.737			293.399	3.14245			719	296.371			293.59	3.04526			719	295.063			293.683	3.49349			719	297.347			293.718	2.93669
		719.5	298.15			293.427	2.94563			719.5	294.269			293.48	3.88961			719.5	290.071			293.397	3.14082			719.5	291.11			293.583	3.04023			719.5	291.644			293.647	3.54405			719.5	297.502			293.718	2.93681
		720	291.465			293.416	2.93204			720	298.388			293.443	3.91794			720	298.203			293.407	3.14233			720	290.69			293.572	3.05316			720	294.593			293.694	3.58183			720	285.626			293.724	2.93715
		720.5	293.452			293.412	2.93616			720.5	290.476			293.417	3.90225			720.5	292.417			293.46	3.11987			720.5	289.662			293.621	3.08719			720.5	288.636			293.664	3.58298			720.5	295.141			293.704	2.95444
		721	298.144			293.411	2.93618			721	291.876			293.456	3.91191			721	292.584			293.431	3.11589			721	292.044			293.62	3.08947			721	296.859			293.657	3.58161			721	294.958			293.718	2.95288
		721.5	291.413			293.388	2.91696			721.5	293.67			293.441	3.92405			721.5	290.484			293.449	3.10682			721.5	290.851			293.651	3.10452			721.5	293.227			293.693	3.5975			721.5	289.843			293.698	2.94559
		722	297.343			293.398	2.91362			722	293.777			293.46	3.93493			722	291.883			293.419	3.08996			722	296.82			293.656	3.10083			722	291.647			293.66	3.61921			722	298.125			293.708	2.93589
		722.5	287.731			293.376	2.90031			722.5	291.935			293.437	3.94739			722.5	295.893			293.441	3.09873			722.5	289.585			293.638	3.09276			722.5	295.922			293.674	3.60522			722.5	294.198			293.721	2.95725
		723	294.282			293.407	2.87278			723	291.138			293.444	3.94596			723	291.267			293.448	3.09842			723	291.626			293.67	3.08348			723	289.623			293.67	3.60213			723	289.405			293.697	2.94581
		723.5	289.652			293.416	2.87813			723.5	287.129			293.481	3.95834			723.5	291.466			293.449	3.09781			723.5	295.637			293.654	3.10174			723.5	298.282			293.631	3.6475			723.5	295.386			293.737	2.88973
		724	298.552			293.426	2.86838			724	296.358			293.498	3.93777			724	296.448			293.449	3.09795			724	289.867			293.641	3.09893			724	291.333			293.678	3.68172			724	293.67			293.718	2.89317
		724.5	290.435			293.385	2.85339			724.5	290.099			293.49	3.93346			724.5	289.362			293.432	3.09367			724.5	294.45			293.664	3.08785			724.5	293.208			293.647	3.68887			724.5	291.877			293.717	2.89275
		725	291.212			293.431	2.87863			725	296.969			293.525	3.93468			725	300.707			293.449	3.0911			725	294.081			293.657	3.08759			725	295.34			293.658	3.68009			725	297.349			293.71	2.90297
		725.5	297.883			293.442	2.87433			725.5	292.904			293.491	3.93509			725.5	293.684			293.441	3.09818			725.5	294.25			293.655	3.08745			725.5	288.562			293.664	3.68797			725.5	288.58			293.697	2.88844
		726	293.638			293.412	2.85874			726	289.996			293.519	3.95209			726	290.884			293.433	3.09214			726	295.205			293.642	3.09089			726	292.178			293.666	3.68659			726	292.979			293.717	2.90581
		726.5	295.611			293.411	2.85871			726.5	294.966			293.515	3.9569			726.5	295.999			293.473	3.09171			726.5	292.03			293.623	3.09273			726.5	289.768			293.667	3.68652			726.5	294.377			293.751	2.89535
		727	289.609			293.37	2.8856			727	294.94			293.505	3.95576			727	291.818			293.435	3.04896			727	291.371			293.627	3.09123			727	295.511			293.681	3.69882			727	286.187			293.752	2.89607
		727.5	293.61			293.394	2.87408			727.5	291.735			293.531	3.98264			727.5	294.323			293.425	3.05138			727.5	294.408			293.658	3.10038			727.5	295.627			293.69	3.68884			727.5	292.041			293.752	2.89608
		728	297.766			293.386	2.87562			728	295.311			293.523	3.98781			728	296.748			293.447	3.04896			728	295.651			293.684	3.12731			728	296.533			293.727	3.7108			728	293.199			293.762	2.89305
		728.5	290.513			293.349	2.86609			728.5	285.14			293.536	3.99746			728.5	291.212			293.423	3.04839			728.5	295.467			293.643	3.15406			728.5	293.559			293.705	3.74699			728.5	292.253			293.749	2.8827
		729	285.035			293.364	2.85903			729	296.037			293.593	3.95938			729	289.705			293.436	3.04723			729	296.407			293.641	3.15297			729	294.243			293.715	3.75442			729	295.537			293.758	2.86912
		729.5	294.445			293.407	2.79745			729.5	297.518			293.572	3.95765			729.5	291.086			293.423	3.0492			729.5	292.72			293.635	3.14882			729.5	292.858			293.71	3.75261			729.5	292.629			293.755	2.87017
		730	293.814			293.394	2.79826			730	292.913			293.554	3.94781			730	289.741			293.399	3.04191			730	290.197			293.629	3.15161			730	291.801			293.679	3.75481			730	298.471			293.747	2.87086
		730.5	291.799			293.394	2.79819			730.5	298.749			293.557	3.94756			730.5	296.906			293.414	3.03848			730.5	291.741			293.665	3.15292			730.5	294.836			293.69	3.75734			730.5	288.007			293.772	2.82585
		731	295.593			293.387	2.80355			731	293.528			293.545	3.93559			731	289.614			293.398	3.06622			731	292.914			293.666	3.15207			731	295.233			293.676	3.76034			731	292.649			293.774	2.8249
		731.5	290.84			293.394	2.81099			731.5	294.444			293.562	3.94318			731.5	293.538			293.406	3.06212			731.5	289.204			293.672	3.15182			731.5	297.191			293.685	3.76061			731.5	295.307			293.782	2.8257
		732	290.994			293.418	2.80979			732	299.87			293.54	3.95073			732	295.774			293.413	3.05588			732	295.867			293.704	3.13875			732	289.193			293.708	3.76275			732	290.699			293.797	2.82526
		732.5	288.595			293.432	2.8046			732.5	293.094			293.525	3.93186			732.5	291.889			293.412	3.05563			732.5	287.779			293.669	3.15496			732.5	295.693			293.684	3.77075			732.5	294.338			293.772	2.83139
		733	294.689			293.464	2.78564			733	293.205			293.514	3.93591			733	295.302			293.428	3.04405			733	292.913			293.745	3.19812			733	291.85			293.673	3.76939			733	293.908			293.79	2.83519
		733.5	295.235			293.475	2.79484			733.5	294.136			293.533	3.94388			733.5	294.518			293.401	3.06693			733.5	295.484			293.72	3.22372			733.5	295.731			293.657	3.76119			733.5	291.366			293.776	2.81936
		734	288.205			293.438	2.821			734	290.108			293.573	3.99072			734	297.467			293.395	3.06325			734	295.678			293.708	3.22179			734	290.336			293.665	3.75305			734	295.92			293.804	2.78956
		734.5	294.127			293.49	2.82211			734.5	295.113			293.573	3.99136			734.5	298.586			293.413	3.06543			734.5	295.846			293.752	3.30957			734.5	295.125			293.682	3.76889			734.5	290.567			293.823	2.79455
		735	294.303			293.482	2.8228			735	295.148			293.584	3.99888			735	296.663			293.381	3.07998			735	294.898			293.713	3.33105			735	294.517			293.675	3.77292			735	291.847			293.782	2.83379
		735.5	289.546			293.484	2.82368			735.5	292.214			293.55	4.01482			735.5	293.497			293.403	3.10386			735.5	292.922			293.729	3.34422			735.5	290.946			293.662	3.7703			735.5	293.698			293.791	2.82685
		736	292.62			293.53	2.83411			736	298.931			293.546	4.01656			736	295.988			293.372	3.09407			736	290.177			293.731	3.34385			736	294.495			293.716	3.79971			736	295.712			293.794	2.828
		736.5	295.391			293.526	2.83614			736.5	287.707			293.555	4.03082			736.5	294.337			293.347	3.07196			736.5	295.799			293.745	3.33479			736.5	291.18			293.688	3.81053			736.5	297.842			293.816	2.84606
		737	294.51			293.534	2.8441			737	295.613			293.568	4.01588			737	294.064			293.34	3.06557			737	299.943			293.764	3.35711			737	293.862			293.724	3.85379			737	298.667			293.854	2.86386
		737.5	294.969			293.536	2.84499			737.5	293.182			293.574	4.02014			737.5	294.228			293.324	3.0726			737.5	296.587			293.732	3.32845			737.5	292.097			293.718	3.85964			737.5	294.639			293.842	2.86019
		738	293.386			293.53	2.84325			738	292.476			293.578	4.02016			738	293.433			293.304	3.06833			738	295.284			293.721	3.32261			738	292.204			293.691	3.87329			738	299.171			293.884	2.87261
		738.5	298.413			293.543	2.848			738.5	296.391			293.574	4.02177			738.5	293.344			293.315	3.07632			738.5	294.311			293.731	3.33008			738.5	294.987			293.746	3.91567			738.5	297.347			293.896	2.8691
		739	293.908			293.519	2.82702			739	287.4			293.564	4.01712			739	294.185			293.302	3.07862			739	290.885			293.705	3.34561			739	294.499			293.708	3.95165			739	293.573			293.899	2.86925
		739.5	296.924			293.512	2.8279			739.5	300.294			293.595	3.99329			739.5	297.101			293.338	3.13035			739.5	290.951			293.725	3.34061			739.5	293.394			293.739	3.96397			739.5	300.579			293.902	2.87107
		740	295.178			293.486	2.82015			740	290.381			293.536	3.98179			740	295.692			293.32	3.14025			740	297.97			293.744	3.3359			740	291.66			293.735	3.96577			740	286.627			293.87	2.86259
		740.5	293.301			293.49	2.82303			740.5	290.5			293.573	3.98702			740.5	292.589			293.319	3.14029			740.5	296.84			293.721	3.32264			740.5	293.732			293.709	3.97538			740.5	294.441			293.837	2.84488
		741	293.413			293.495	2.82366			741	296.322			293.57	3.98942			741	294.063			293.337	3.15667			741	298.793			293.722	3.32403			741	290.417			293.717	3.97885			741	298.568			293.823	2.84795
		741.5	296.639			293.486	2.82728			741.5	290.812			293.563	3.98597			741.5	293.473			293.29	3.17073			741.5	295.091			293.667	3.33083			741.5	293.83			293.697	3.9911			741.5	287.608			293.766	2.8554
		742	291.35			293.511	2.87847			742	290.819			293.582	3.98172			742	294.447			293.322	3.22699			742	296.326			293.677	3.33743			742	296.056			293.708	3.98855			742	295.12			293.765	2.85425
		742.5	292.562			293.511	2.87836			742.5	297.124			293.584	3.98015			742.5	286.993			293.304	3.24112			742.5	294.713			293.673	3.33523			742.5	289.585			293.737	4.01003			742.5	291.094			293.74	2.87791
		743	302.095			293.53	2.88431			743	285.688			293.58	3.97685			743	294.693			293.266	3.27675			743	293.886			293.657	3.338			743	297.996			293.742	4.00692			743	294.732			293.701	2.83756
		743.5	290.856			293.468	2.83279			743.5	296.977			293.615	3.93782			743.5	296.03			293.273	3.27869			743.5	294.021			293.678	3.35236			743.5	291.593			293.755	4.01158			743.5	298.042			293.768	2.82895
		744	292.903			293.504	2.84618			744	292.742			293.603	3.93127			744	293.465			293.258	3.28046			744	290.425			293.665	3.35591			744	292.491			293.738	4.00909			744	288.714			293.728	2.87761
		744.5	292.674			293.525	2.85743			744.5	292.677			293.62	3.93462			744.5	294.565			293.324	3.28748			744.5	299.425			293.71	3.37177			744.5	296.153			293.744	4.00346			744.5	293.483			293.741	2.90609
		745	293.725			293.527	2.85706			745	291.778			293.625	3.93407			745	292.498			293.307	3.28942			745	291.119			293.703	3.36155			745	290.96			293.731	3.99368			745	293.425			293.75	2.88999
		745.5	296.341			293.529	2.85729			745.5	287.696			293.649	3.93718			745.5	296.157			293.28	3.28898			745.5	295.183			293.702	3.36223			745.5	296.754			293.696	4.04191			745.5	297.048			293.74	2.88857
		746	288.742			293.512	2.85048			746	295.783			293.681	3.91463			746	292.354			293.329	3.36389			746	293.128			293.724	3.38712			746	298.224			293.72	4.049			746	292.988			293.78	2.90741
		746.5	292.494			293.521	2.83851			746.5	295.457			293.675	3.91243			746.5	298.264			293.294	3.38773			746.5	293.463			293.712	3.39419			746.5	293.391			293.708	4.04532			746.5	292.833			293.757	2.91865
		747	292.369			293.511	2.84642			747	290.104			293.659	3.91167			747	290.424			293.305	3.38877			747	294.684			293.738	3.41199			747	298.385			293.714	4.04205			747	295.618			293.739	2.90316
		747.5	295.274			293.499	2.85607			747.5	298.388			293.651	3.921			747.5	296.288			293.305	3.38918			747.5	295.38			293.715	3.42018			747.5	289.511			293.715	4.04299			747.5	293.039			293.775	2.88536
		748	293.275			293.496	2.85485			748	290.168			293.629	3.90671			748	296.095			293.278	3.41911			748	296.942			293.696	3.42157			748	290.901			293.683	4.03281			748	293.315			293.761	2.89276
		748.5	288.074			293.47	2.88219			748.5	295.489			293.629	3.90686			748.5	294.197			293.268	3.40757			748.5	293.519			293.691	3.41734			748.5	293.714			293.696	4.03636			748.5	295.948			293.782	2.90484
		749	299.831			293.501	2.85731			749	297.998			293.625	3.9053			749	292.513			293.253	3.42648			749	295.017			293.683	3.41969			749	285.924			293.676	4.02295			749	294.33			293.755	2.89961
		749.5	288.672			293.477	2.82421			749.5	291.866			293.605	3.89307			749.5	291.881			293.239	3.41973			749.5	295.176			293.686	3.42136			749.5	297.837			293.702	4.01273			749.5	296.313			293.764	2.89994
		750	293.83			293.5	2.80362			750	296.57			293.594	3.90084			750	288.462			293.231	3.4149			750	298.341			293.673	3.42085			750	298.469			293.747	4.0315			750	293.371			293.778	2.9025
		750.5	292.69			293.533	2.84554			750.5	294.2			293.577	3.89533			750.5	295.343			293.188	3.4564			750.5	294.594			293.635	3.41046			750.5	290.951			293.739	4.03339			750.5	297.121			293.763	2.90058
		751	292.284			293.55	2.85087			751	291.444			293.593	3.90501			751	287.444			293.206	3.46263			751	290.209			293.622	3.41216			751	299.525			293.786	3.99678			751	296.934			293.775	2.90227
		751.5	294.61			293.571	2.85681			751.5	298.986			293.613	3.90397			751.5	293.895			293.204	3.4635			751.5	295.461			293.631	3.40539			751.5	291.928			293.774	3.98843			751.5	297.941			293.754	2.92057
		752	292.806			293.572	2.85737			752	291.189			293.614	3.90601			752	296.672			293.228	3.45579			752	284.446			293.637	3.40949			752	289.971			293.751	3.98449			752	293.317			293.735	2.91852
		752.5	296.466			293.571	2.85787			752.5	287.371			293.627	3.90223			752.5	296.921			293.209	3.45429			752.5	295.03			293.69	3.34816			752.5	298.57			293.728	4.01255			752.5	291.909			293.749	2.92739
		753	295.269			293.519	2.9004			753	292.347			293.651	3.87823			753	296.736			293.28	3.47874			753	288.385			293.674	3.34927			753	288.944			293.734	4.02136			753	294.734			293.708	2.94733
		753.5	289.529			293.549	2.94958			753.5	290.938			293.657	3.87713			753.5	293.935			293.249	3.49969			753.5	297.449			293.699	3.32833			753.5	297.952			293.737	4.02022			753.5	290.333			293.71	2.95463
		754	295.661			293.549	2.94965			754	287.202			293.671	3.87233			754	290.419			293.278	3.5503			754	294.413			293.673	3.3192			754	293.706			293.763	4.01256			754	296.209			293.693	2.95209
		754.5	287.726			293.528	2.94897			754.5	295.102			293.698	3.84586			754.5	291.569			293.255	3.54146			754.5	290.51			293.671	3.31889			754.5	291.629			293.75	4.00119			754.5	291.374			293.701	2.96314
		755	295.937			293.587	2.95026			755	287.509			293.703	3.8481			755	290.37			293.235	3.53298			755	295.027			293.658	3.33578			755	295.218			293.752	3.99944			755	296.283			293.703	2.96585
		755.5	290.33			293.568	2.94718			755.5	287.918			293.727	3.82407			755.5	296.114			293.255	3.5487			755.5	291.458			293.669	3.3439			755.5	289.609			293.723	3.98995			755.5	296.833			293.678	2.99002
		756	295.86			293.636	3.02787			756	295.835			293.739	3.80992			756	293.794			293.235	3.57659			756	291.101			293.693	3.34497			756	288.988			293.718	3.99052			756	291.595			293.696	2.98994
		756.5	293.707			293.615	3.02723			756.5	293.884			293.737	3.80889			756.5	289.541			293.257	3.58034			756.5	293.787			293.679	3.36115			756.5	294.501			293.719	3.9899			756.5	292.765			293.705	2.99604
		757	296.416			293.601	3.03302			757	298.834			293.714	3.82178			757	291.258			293.29	3.58364			757	293.808			293.689	3.36422			757	289.541			293.721	3.99085			757	294.203			293.701	3.00155
		757.5	291.324			293.645	3.13596			757.5	287.961			293.703	3.81037			757.5	292.57			293.251	3.59564			757.5	291.55			293.688	3.36421			757.5	294.533			293.698	4.02817			757.5	294.429			293.698	2.99934
		758	291.065			293.616	3.18463			758	299.287			293.726	3.78948			758	288.573			293.288	3.63918			758	293.649			293.704	3.36159			758	294.554			293.724	4.01433			758	287.572			293.695	3.00169
		758.5	293.478			293.652	3.19723			758.5	293.582			293.692	3.76987			758.5	292.434			293.278	3.65216			758.5	291.143			293.724	3.37339			758.5	291.801			293.71	4.0161			758.5	294.351			293.689	2.99758
		759	286.001			293.629	3.21572			759	293.644			293.745	3.84105			759	295.299			293.293	3.64995			759	296.073			293.741	3.36886			759	295.475			293.744	4.00924			759	292.607			293.69	2.99951
		759.5	293.202			293.627	3.22001			759.5	296.491			293.698	3.89773			759.5	297.757			293.319	3.66328			759.5	288.217			293.725	3.36516			759.5	290.462			293.749	4.01071			759.5	295.759			293.683	3.00599
		760	292.89			293.64	3.22323			760	285.07			293.688	3.89295			760	291.935			293.328	3.65389			760	291.872			293.739	3.34814			760	293.317			293.746	4.01033			760	293.198			293.717	3.03334
		760.5	297.733			293.65	3.22401			760.5	294.77			293.764	3.8728			760.5	293.558			293.354	3.66645			760.5	297.075			293.749	3.34554			760.5	298.742			293.782	4.02574			760.5	297.613			293.684	3.06378
		761	293.985			293.63	3.21101			761	298.505			293.741	3.88046			761	299.138			293.348	3.66418			761	296.219			293.751	3.34737			761	292.968			293.749	4.03914			761	292.371			293.685	3.0639
		761.5	292.428			293.618	3.21402			761.5	288.655			293.739	3.87914			761.5	289.064			293.296	3.67491			761.5	291.678			293.69	3.41299			761.5	292.769			293.773	4.03384			761.5	296.94			293.745	3.06154
		762	291.649			293.601	3.23027			762	293.092			293.773	3.86389			762	296.802			293.35	3.73396			762	295.037			293.746	3.46979			762	295.325			293.778	4.0338			762	295.272			293.737	3.06192
		762.5	292.248			293.629	3.23735			762.5	291.67			293.755	3.87554			762.5	291.241			293.322	3.75294			762.5	297.213			293.728	3.47204			762.5	291.731			293.733	4.02848			762.5	291.018			293.751	3.06284
		763	291.45			293.674	3.28118			763	288.346			293.786	3.88427			763	287.518			293.318	3.74647			763	297.159			293.693	3.47274			763	295.999			293.75	4.03252			763	291.952			293.786	3.1242
		763.5	293.743			293.684	3.27744			763.5	293.916			293.815	3.86516			763.5	299.488			293.329	3.73695			763.5	295.713			293.695	3.4751			763.5	294.679			293.744	4.03493			763.5	292.76			293.785	3.12427
		764	294.787			293.67	3.28323			764	298.682			293.81	3.86573			764	291.082			293.288	3.74319			764	295.252			293.641	3.52656			764	292.111			293.699	4.06569			764	296.691			293.749	3.12129
		764.5	292.097			293.665	3.2823			764.5	294.342			293.787	3.85031			764.5	290.121			293.313	3.74625			764.5	289.488			293.625	3.52644			764.5	287.697			293.72	4.06587			764.5	294.169			293.753	3.12005
		765	292.007			293.663	3.28339			765	297.2			293.793	3.85206			765	294.069			293.331	3.72743			765	296.64			293.648	3.51434			765	295.029			293.692	4.06876			765	290.283			293.739	3.11186
		765.5	297.295			293.708	3.3224			765.5	290.552			293.78	3.84494			765.5	288.918			293.296	3.70196			765.5	297.83			293.623	3.51064			765.5	293.123			293.675	4.07223			765.5	294.993			293.724	3.11166
		766	295.238			293.659	3.34104			766	298.166			293.766	3.8615			766	294.605			293.314	3.69973			766	292.414			293.634	3.52603			766	296.059			293.675	4.07211			766	292.63			293.728	3.10822
		766.5	289.245			293.65	3.33924			766.5	296.543			293.758	3.8542			766.5	294.453			293.328	3.69285			766.5	293.929			293.619	3.53728			766.5	293.056			293.697	4.05141			766.5	291.402			293.748	3.10908
		767	295.115			293.681	3.32701			767	297.844			293.727	3.85659			767	288.883			293.348	3.70686			767	294.058			293.616	3.53728			767	298.813			293.692	4.05041			767	295.849			293.762	3.1108
		767.5	294.979			293.648	3.3455			767.5	300.011			293.714	3.84677			767.5	295.46			293.356	3.69883			767.5	293.646			293.618	3.53768			767.5	293.982			293.692	4.05044			767.5	293.792			293.749	3.10396
		768	290.371			293.651	3.34704			768	286.563			293.705	3.8341			768	284.013			293.357	3.69918			768	290.825			293.617	3.53769			768	294.779			293.682	4.04705			768	294.543			293.747	3.10382
		768.5	295.221			293.664	3.33923			768.5	291.281			293.746	3.80138			768.5	298.664			293.358	3.69978			768.5	296.368			293.655	3.54867			768.5	294.741			293.707	4.05788			768.5	293.563			293.758	3.09534
		769	288.998			293.624	3.36975			769	296.276			293.766	3.79882			769	293.881			293.359	3.6995			769	294.819			293.626	3.55054			769	291.539			293.673	4.04337			769	286.131			293.748	3.09465
		769.5	295.79			293.68	3.38733			769.5	294.083			293.741	3.79866			769.5	293.256			293.356	3.69825			769.5	296.664			293.615	3.55012			769.5	301.841			293.694	4.05589			769.5	297.706			293.754	3.09363
		770	292.26			293.635	3.41976			770	302.609			293.749	3.80086			770	297.305			293.397	3.63931			770	294.358			293.618	3.55224			770	292.02			293.682	4.05628			770	295.634			293.769	3.08949
		770.5	297.076			293.65	3.4202			770.5	289.372			293.71	3.74964			770.5	292.275			293.357	3.62455			770.5	293.808			293.607	3.55341			770.5	296.318			293.678	4.0557			770.5	293.246			293.755	3.08636
		771	292.206			293.659	3.43238			771	289.673			293.715	3.74527			771	292.771			293.358	3.62475			771	290.077			293.62	3.55949			771	293.061			293.701	4.05655			771	294.689			293.756	3.08637
		771.5	293.395			293.649	3.43955			771.5	299.269			293.709	3.7517			771.5	294.669			293.33	3.64742			771.5	301.867			293.617	3.563			771.5	294.359			293.64	4.02555			771.5	288.946			293.746	3.0868
		772	293.93			293.67	3.45088			772	284.539			293.681	3.73095			772	289.623			293.344	3.66682			772	292.718			293.56	3.52176			772	293.712			293.65	4.02397			772	293.07			293.728	3.09836
		772.5	295.906			293.664	3.45149			772.5	300.432			293.708	3.68359			772.5	293.304			293.379	3.69001			772.5	293.414			293.593	3.54474			772.5	297.394			293.643	4.02046			772.5	291.361			293.77	3.05118
		773	297.774			293.641	3.45206			773	292.886			293.686	3.65597			773	294.025			293.369	3.69416			773	294.949			293.58	3.5498			773	291.007			293.62	4.03617			773	293.633			293.767	3.04656
		773.5	289.495			293.664	3.49495			773.5	291.607			293.694	3.656			773.5	289.939			293.367	3.69356			773.5	294.29			293.597	3.56337			773.5	298.766			293.61	4.03704			773.5	296.223			293.733	3.06182
		774	295.289			293.672	3.48714			774	295.425			293.707	3.65324			774	295.26			293.379	3.68507			774	298.579			293.58	3.56798			774	288.599			293.587	4.04918			774	294.979			293.713	3.07931
		774.5	293.523			293.662	3.48536			774.5	290.658			293.698	3.65125			774.5	291.613			293.397	3.69355			774.5	290.959			293.534	3.56292			774.5	298.863			293.584	4.04646			774.5	294.384			293.697	3.08201
		775	290.147			293.671	3.48748			775	296.042			293.736	3.65962			775	290.51			293.383	3.69668			775	290.741			293.556	3.5609			775	290.745			293.596	4.04235			775	298.704			293.71	3.0678
		775.5	294.872			293.668	3.49111			775.5	292.509			293.724	3.65597			775.5	293.038			293.39	3.69163			775.5	291.247			293.567	3.55567			775.5	292.672			293.597	4.0439			775.5	288.982			293.716	3.06789
		776	292.295			293.689	3.51051			776	288.032			293.709	3.66798			776	288.817			293.407	3.70837			776	293.113			293.577	3.55197			776	301.241			293.649	4.04654			776	292.181			293.717	3.06725
		776.5	296.491			293.702	3.51011			776.5	299.909			293.745	3.64766			776.5	292.918			293.411	3.7069			776.5	295.068			293.6	3.56481			776.5	293.255			293.602	4.04062			776.5	299.188			293.706	3.07155
		777	297.974			293.674	3.50997			777	287.764			293.725	3.62423			777	289.659			293.432	3.70218			777	290.292			293.581	3.56728			777	293.958			293.617	4.03554			777	294.23			293.692	3.0664
		777.5	292.873			293.668	3.50401			777.5	290.992			293.75	3.59999			777.5	296.907			293.449	3.70871			777.5	289.708			293.615	3.56808			777.5	296.046			293.616	4.03579			777.5	296.08			293.647	3.11129
		778	298.485			293.665	3.50521			778	296.903			293.756	3.59658			778	294.511			293.463	3.69657			778	298.099			293.64	3.55838			778	292.025			293.562	4.00551			778	292.245			293.675	3.14237
		778.5	290.449			293.656	3.49573			778.5	289.342			293.745	3.59023			778.5	291.167			293.495	3.71944			778.5	289.552			293.596	3.55797			778.5	294.969			293.558	4.00631			778.5	294.316			293.629	3.13559
		779	294.925			293.688	3.49507			779	293.856			293.775	3.57868			779	295.907			293.509	3.71015			779	298.938			293.637	3.55832			779	295.482			293.585	4.02775			779	295.546			293.672	3.13032
		779.5	296.247			293.649	3.52382			779.5	288.042			293.759	3.58551			779.5	294.477			293.473	3.71148			779.5	289.066			293.616	3.53918			779.5	292.96			293.545	4.0422			779.5	291.934			293.684	3.12906
		780	294.458			293.658	3.53274			780	295.865			293.797	3.56476			780	291.742			293.458	3.71339			780	292.531			293.656	3.5336			780	297.086			293.564	4.04346			780	296.488			293.633	3.12103
		780.5	291.435			293.621	3.56362			780.5	293.258			293.794	3.56353			780.5	298.165			293.458	3.71342			780.5	296.635			293.688	3.55153			780.5	293.108			293.564	4.04361			780.5	294.201			293.672	3.17571
		781	290.473			293.629	3.56044			781	290.373			293.782	3.56939			781	289.127			293.464	3.71818			781	289.246			293.678	3.54605			781	286.05			293.541	4.04558			781	295.693			293.641	3.18228
		781.5	293.899			293.634	3.55716			781.5	294.492			293.8	3.56123			781.5	303.115			293.453	3.71832			781.5	295.646			293.7	3.53211			781.5	302.016			293.589	4.09452			781.5	296.995			293.652	3.18115
		782	293.626			293.591	3.60584			782	289.898			293.775	3.57448			782	291.2			293.452	3.71898			782	292.425			293.674	3.53704			782	295.327			293.544	4.10558			782	294.801			293.644	3.18138
		782.5	292.722			293.595	3.60651			782.5	299.583			293.805	3.56739			782.5	292.042			293.429	3.70388			782.5	291.831			293.659	3.54877			782.5	297.105			293.567	4.11639			782.5	294.28			293.647	3.18392
		783	296.45			293.607	3.60734			783	293.862			293.757	3.55458			783	293.793			293.44	3.69424			783	298.959			293.68	3.55043			783	294.688			293.622	4.08884			783	294.347			293.679	3.19814
		783.5	288.997			293.579	3.60708			783.5	289.161			293.736	3.56622			783.5	293.124			293.371	3.6416			783.5	290.854			293.643	3.53373			783.5	292.605			293.556	4.05863			783.5	297.226			293.666	3.19194
		784	294.446			293.617	3.59881			784	300.005			293.772	3.55637			784	294.034			293.386	3.63899			784	292.232			293.665	3.52997			784	300.604			293.576	4.07589			784	293.843			293.658	3.1927
		784.5	295.965			293.624	3.60209			784.5	290.966			293.734	3.53009			784.5	298.078			293.384	3.64019			784.5	294.607			293.651	3.54118			784.5	294.104			293.528	4.0906			784.5	292.337			293.689	3.24076
		785	287.41			293.624	3.60224			785	290.5			293.771	3.53983			785	296.627			293.391	3.6423			785	288.271			293.647	3.54055			785	287.616			293.515	4.09074			785	294.396			293.689	3.24077
		785.5	297.751			293.657	3.57531			785.5	297.932			293.769	3.54211			785.5	301.471			293.384	3.64397			785.5	298.269			293.697	3.53586			785.5	299.699			293.525	4.09093			785.5	293.563			293.661	3.25457
		786	290.703			293.61	3.58363			786	292.284			293.753	3.53049			786	288.08			293.406	3.66061			786	296.519			293.66	3.52673			786	286.606			293.462	4.0786			786	288.945			293.658	3.25427
		786.5	293.161			293.629	3.57821			786.5	300.152			293.774	3.53397			786.5	293.483			293.386	3.64591			786.5	286.625			293.66	3.52604			786.5	295.069			293.507	4.13383			786.5	295.158			293.642	3.25847
		787	297.714			293.627	3.57867			787	292.143			293.735	3.50613			787	291.934			293.362	3.64009			787	294.015			293.7	3.49156			787	293.281			293.525	4.11558			787	293.411			293.591	3.28277
		787.5	284.763			293.635	3.59077			787.5	294.619			293.734	3.50685			787.5	291.105			293.311	3.5974			787.5	293.707			293.694	3.49211			787.5	288.405			293.477	4.09893			787.5	294.255			293.592	3.28296
		788	297.762			293.678	3.53532			788	296.257			293.729	3.50629			788	292.185			293.351	3.58334			788	290.932			293.685	3.49429			788	297.58			293.511	4.06978			788	295.41			293.594	3.28224
		788.5	294.674			293.646	3.52757			788.5	289.982			293.722	3.50256			788.5	289.376			293.376	3.60173			788.5	294.581			293.674	3.50773			788.5	290.122			293.494	4.07025			788.5	285.823			293.611	3.29413
		789	294.807			293.682	3.57636			789	293.492			293.763	3.50691			789	289.753			293.39	3.6016			789	292.492			293.662	3.50872			789	294.689			293.502	4.07146			789	294.83			293.635	3.31247
		789.5	295.205			293.641	3.61169			789.5	290.897			293.775	3.51008			789.5	295.106			293.379	3.61224			789.5	290.555			293.656	3.51165			789.5	298.814			293.527	4.05532			789.5	293.578			293.641	3.30576
		790	290.77			293.657	3.62583			790	294.267			293.765	3.52114			790	287.884			293.4	3.61744			790	295.738			293.655	3.51284			790	289.029			293.53	4.05848			790	296.272			293.649	3.31155
		790.5	292.118			293.668	3.6203			790.5	294.758			293.806	3.57484			790.5	296.071			293.434	3.61177			790.5	291.093			293.662	3.51906			790.5	292.8			293.55	4.05138			790.5	295.387			293.647	3.31188
		791	294.107			293.673	3.61889			791	289.309			293.773	3.59713			791	294.937			293.428	3.62003			791	293.88			293.67	3.51519			791	294.131			293.538	4.05147			791	288.921			293.644	3.3116
		791.5	289.522			293.668	3.61891			791.5	295.997			293.785	3.58618			791.5	290.316			293.46	3.66511			791.5	291.934			293.663	3.51605			791.5	291.739			293.532	4.04456			791.5	297.825			293.634	3.30924
		792	292.823			293.664	3.62437			792	293.105			293.779	3.58348			792	294.426			293.479	3.64629			792	290.408			293.682	3.51698			792	297.933			293.536	4.0401			792	287.516			293.65	3.27856
		792.5	295.511			293.646	3.63796			792.5	289.253			293.77	3.58748			792.5	294.837			293.471	3.64241			792.5	294.271			293.672	3.52884			792.5	291.294			293.544	4.04016			792.5	296.469			293.644	3.27749
		793	295.393			293.654	3.64358			793	295.133			293.79	3.57339			793	294.547			293.461	3.64108			793	292.961			293.694	3.54587			793	298.616			293.545	4.04032			793	290.815			293.652	3.27899
		793.5	288.162			293.653	3.64317			793.5	291.573			293.789	3.57317			793.5	290.384			293.461	3.64082			793.5	294.519			293.68	3.55394			793.5	292.837			293.582	4.05722			793.5	289.939			293.639	3.2737
		794	297.222			293.675	3.62293			794	298.287			293.774	3.58871			794	293.752			293.478	3.65294			794	300.268			293.693	3.56141			794	290.121			293.554	4.04628			794	299.782			293.648	3.28045
		794.5	295.48			293.654	3.6145			794.5	293.604			293.759	3.57587			794.5	291.864			293.463	3.65338			794.5	288.715			293.641	3.54046			794.5	296.775			293.58	4.04842			794.5	291.46			293.654	3.27272
		795	292.287			293.612	3.64226			795	293.724			293.749	3.5788			795	290.572			293.467	3.65476			795	296.202			293.653	3.52846			795	291.011			293.539	4.03866			795	293.36			293.642	3.26155
		795.5	294.949			293.652	3.67117			795.5	297.27			293.759	3.5813			795.5	289.19			293.501	3.65799			795.5	288.447			293.681	3.57145			795.5	292.379			293.548	4.03912			795.5	292.045			293.681	3.23424
		796	290.856			293.645	3.67004			796	294.128			293.768	3.59206			796	292.839			293.495	3.65862			796	292.542			293.684	3.56643			796	296.3			293.555	4.03476			796	291.94			293.637	3.25517
		796.5	294.247			293.637	3.67692			796.5	292.234			293.757	3.59397			796.5	298.228			293.518	3.6629			796.5	298.771			293.694	3.56593			796.5	282.989			293.536	4.02842			796.5	296.59			293.66	3.25135
		797	296.282			293.659	3.69254			797	298.442			293.791	3.61204			797	294.976			293.508	3.67385			797	287.958			293.665	3.5482			797	290.442			293.552	4.02469			797	293.19			293.666	3.24536
		797.5	293.305			293.652	3.68898			797.5	287.286			293.75	3.60657			797.5	294.131			293.53	3.66102			797.5	299.549			293.692	3.52513			797.5	288.759			293.57	4.02733			797.5	292.386			293.64	3.21659
		798	294.984			293.66	3.68992			798	299.182			293.786	3.57788			798	295.408			293.536	3.66087			798	297.529			293.677	3.50669			798	291.07			293.522	4.0513			798	293.658			293.651	3.21283
		798.5	287.355			293.67	3.69626			798.5	299.433			293.766	3.55856			798.5	288.283			293.494	3.65525			798.5	294.615			293.653	3.49678			798.5	298.933			293.582	3.9829			798.5	291.57			293.647	3.21377
		799	295.171			293.683	3.67787			799	288.673			293.737	3.53581			799	302.124			293.504	3.66158			799	298.587			293.644	3.49642			799	288.049			293.576	3.98829			799	297.772			293.667	3.21639
		799.5	292.902			293.681	3.67716			799.5	300.277			293.777	3.52359			799.5	289.531			293.506	3.66214			799.5	289.812			293.629	3.48109			799.5	294.467			293.606	3.97444			799.5	292.165			293.675	3.21407
		800	292.846			293.691	3.67756			800	286.191			293.707	3.53281			800	291.852			293.5	3.65994			800	294.667			293.659	3.47427			800	296.035			293.613	3.97115			800	295.768			293.654	3.20839
		800.5	298.314			293.695	3.67708			800.5	292.253			293.751	3.49331			800.5	294.188			293.539	3.64614			800.5	291.745			293.656	3.47371			800.5	289.116			293.59	3.95335			800.5	292.78			293.677	3.22124
		801	288.009			293.653	3.67279			801	297.45			293.764	3.49262			801	290.062			293.494	3.59487			801	292.112			293.664	3.47123			801	300.451			293.628	3.93633			801	293.219			293.678	3.22085
		801.5	292.771			293.681	3.65093			801.5	289.117			293.737	3.48488			801.5	295.021			293.542	3.60608			801.5	293.888			293.685	3.4752			801.5	293.975			293.593	3.95897			801.5	287.056			293.653	3.23964
		802	291.061			293.682	3.65066			802	297.59			293.767	3.47088			802	290.442			293.554	3.60435			802	289.786			293.675	3.47751			802	290.925			293.59	3.95722			802	293.095			293.669	3.23717
		802.5	295.563			293.695	3.64593			802.5	292.153			293.733	3.46713			802.5	294.715			293.553	3.6042			802.5	292.933			293.685	3.46948			802.5	296.04			293.601	3.94783			802.5	292.33			293.654	3.22485
		803	292.58			293.695	3.64573			803	292.3			293.741	3.46535			803	294.486			293.576	3.59664			803	297.714			293.662	3.48924			803	290.18			293.584	3.92504			803	293.155			293.671	3.22578
		803.5	296.548			293.689	3.64858			803.5	304.698			293.756	3.46521			803.5	299.322			293.549	3.60657			803.5	291.446			293.624	3.48668			803.5	296.147			293.58	3.92498			803.5	294.357			293.642	3.23266
		804	295.639			293.671	3.64335			804	284.909			293.689	3.38173			804	296.207			293.567	3.59997			804	292.44			293.633	3.48333			804	295.214			293.583	3.92357			804	295.153			293.652	3.23294
		804.5	295.871			293.646	3.64664			804.5	296.809			293.735	3.32418			804.5	294.245			293.583	3.61191			804.5	294.969			293.646	3.48379			804.5	287.873			293.587	3.92681			804.5	289.768			293.649	3.2334
		805	292.981			293.629	3.64438			805	298.846			293.714	3.31788			805	293.637			293.534	3.66524			805	292.365			293.644	3.48299			805	297.103			293.597	3.92069			805	291.209			293.689	3.20016
		805.5	294.512			293.646	3.64967			805.5	286.866			293.672	3.3065			805.5	292.197			293.513	3.64392			805.5	290.686			293.654	3.48218			805.5	291.518			293.582	3.91665			805.5	296.957			293.692	3.1999
		806	298.117			293.633	3.65105			806	299.452			293.706	3.27112			806	289.592			293.513	3.64406			806	293.597			293.677	3.47795			806	298.453			293.57	3.91515			806	293.119			293.744	3.25933
		806.5	290.878			293.61	3.6372			806.5	291.311			293.681	3.24603			806.5	291.772			293.502	3.64533			806.5	299.541			293.701	3.49377			806.5	293.08			293.6	3.89421			806.5	295.155			293.742	3.25961
		807	296.971			293.634	3.63464			807	290.153			293.713	3.25532			807	301.285			293.515	3.65031			807	288.057			293.653	3.47905			807	297.027			293.581	3.88633			807	294.406			293.76	3.27268
		807.5	297.279			293.626	3.6294			807.5	295.3			293.739	3.24723			807.5	294.548			293.518	3.64938			807.5	293.537			293.693	3.46007			807.5	301.682			293.588	3.8838			807.5	288.6			293.737	3.27911
		808	290.01			293.639	3.64726			808	289.112			293.719	3.24964			808	295.881			293.538	3.6387			808	291.601			293.689	3.46065			808	289.51			293.571	3.86986			808	299.079			293.718	3.31354
		808.5	295.191			293.657	3.63819			808.5	297.42			293.734	3.23536			808.5	296.372			293.546	3.6366			808.5	288.233			293.703	3.45779			808.5	298.787			293.582	3.87142			808.5	293.206			293.745	3.31488
		809	292.203			293.648	3.63658			809	297.445			293.712	3.22513			809	291.124			293.486	3.607			809	298.359			293.733	3.43624			809	292.475			293.583	3.87244			809	298.472			293.724	3.3077
		809.5	292.076			293.683	3.65536			809.5	291.497			293.704	3.21757			809.5	292.681			293.5	3.61712			809.5	291.491			293.717	3.42194			809.5	288.042			293.545	3.82955			809.5	289.904			293.727	3.30742
		810	297.019			293.693	3.65377			810	294.2			293.707	3.21572			810	292.315			293.503	3.61932			810	291.624			293.749	3.43132			810	294.592			293.54	3.83476			810	294.066			293.701	3.31644
		810.5	295.142			293.684	3.64773			810.5	290.995			293.704	3.21554			810.5	292.345			293.48	3.61571			810.5	293.548			293.758	3.4281			810.5	287.963			293.502	3.82053			810.5	295.328			293.676	3.32959
		811	295.836			293.656	3.65788			811	290.169			293.709	3.21203			811	288.948			293.513	3.62434			811	290.348			293.741	3.43768			811	298.278			293.532	3.83703			811	292.241			293.701	3.30991
		811.5	295.257			293.634	3.6583			811.5	292.576			293.736	3.2048			811.5	293.265			293.496	3.63671			811.5	299.085			293.75	3.43076			811.5	292.919			293.539	3.82863			811.5	293.021			293.665	3.28988
		812	294.722			293.651	3.67414			812	290.271			293.735	3.20523			812	292.306			293.475	3.65552			812	293.307			293.725	3.40987			812	288.579			293.562	3.84888			812	293.76			293.676	3.29221
		812.5	293.287			293.626	3.68404			812.5	297.75			293.743	3.19868			812.5	289.396			293.498	3.66334			812.5	296.982			293.734	3.41124			812.5	302.828			293.575	3.83435			812.5	293.468			293.649	3.27467
		813	291.386			293.632	3.68445			813	291.594			293.706	3.19424			813	297.498			293.519	3.6492			813	298.409			293.696	3.41663			813	292.715			293.554	3.82001			813	300.668			293.653	3.27037
		813.5	290.093			293.618	3.69779			813.5	294.311			293.721	3.19123			813.5	291.428			293.518	3.64925			813.5	289.898			293.68	3.40194			813.5	297.806			293.557	3.81974			813.5	289.878			293.654	3.27045
		814	291.915			293.626	3.69217			814	294.315			293.701	3.20039			814	294.239			293.522	3.64832			814	295.982			293.683	3.39961			814	291.827			293.559	3.81815			814	294.067			293.641	3.26881
		814.5	287.269			293.635	3.6902			814.5	295.377			293.708	3.2033			814.5	291.671			293.514	3.66009			814.5	290.892			293.661	3.39882			814.5	290.399			293.497	3.76651			814.5	291.484			293.671	3.28247
		815	293.753			293.658	3.66456			815	291.821			293.71	3.20487			815	294.89			293.528	3.68115			815	291.24			293.665	3.39618			815	293.359			293.519	3.77446			815	292.092			293.665	3.28484
		815.5	292.553			293.695	3.70261			815.5	294.235			293.702	3.21221			815.5	291.4			293.53	3.68024			815.5	294.637			293.654	3.40647			815.5	288.845			293.496	3.76224			815.5	293.647			293.638	3.30606
		816	295.58			293.697	3.70225			816	291.142			293.692	3.21369			816	291.003			293.519	3.68127			816	291.004			293.654	3.40622			816	297.493			293.499	3.76102			816	293.224			293.655	3.31448
		816.5	293.058			293.697	3.70258			816.5	296.135			293.702	3.20885			816.5	297.591			293.538	3.68148			816.5	291.3			293.659	3.40284			816.5	291.394			293.527	3.7583			816.5	291.953			293.625	3.27743
		817	291.065			293.715	3.70808			817	292.324			293.679	3.20786			817	296.545			293.528	3.68048			817	291.462			293.681	3.40183			817	289.935			293.494	3.78767			817	294.485			293.682	3.3095
		817.5	295.801			293.717	3.70665			817.5	288.354			293.699	3.21228			817.5	291.327			293.551	3.68097			817.5	290.97			293.705	3.40283			817.5	298.171			293.536	3.78213			817.5	289.174			293.658	3.32415
		818	293.183			293.708	3.70377			818	296.596			293.725	3.18987			818	295.678			293.556	3.67804			818	294.816			293.702	3.4049			818	285.101			293.514	3.77181			818	294.819			293.658	3.32382
		818.5	292.376			293.703	3.70526			818.5	292.502			293.719	3.18525			818.5	294.875			293.529	3.66818			818.5	292.749			293.703	3.40522			818.5	301.223			293.511	3.77339			818.5	292.811			293.671	3.32259
		819	291.064			293.703	3.70535			819	291.041			293.717	3.18579			819	297.412			293.519	3.6629			819	295.314			293.703	3.4054			819	290.491			293.532	3.76507			819	291.857			293.645	3.3428
		819.5	290.628			293.72	3.70105			819.5	297.617			293.706	3.19997			819.5	291.023			293.506	3.67545			819.5	294.866			293.702	3.40512			819.5	293.695			293.517	3.75246			819.5	299.909			293.669	3.35736
		820	295.949			293.731	3.69507			820	286.762			293.685	3.18801			820	293.694			293.508	3.67674			820	288.903			293.703	3.40563			820	298.865			293.553	3.70563			820	292.767			293.697	3.36598
		820.5	290.477			293.727	3.693			820.5	293.218			293.717	3.15011			820.5	292.078			293.516	3.68145			820.5	300.685			293.701	3.40821			820.5	288.003			293.535	3.67728			820.5	293.596			293.669	3.38187
		821	293.239			293.748	3.68641			821	298.32			293.742	3.16536			821	296.878			293.484	3.6756			821	289.323			293.671	3.37273			821	291.409			293.552	3.67094			821	291.282			293.714	3.38044
		821.5	293.531			293.761	3.6895			821.5	288.812			293.699	3.16127			821.5	294.04			293.507	3.67458			821.5	298.237			293.685	3.36048			821.5	296.06			293.558	3.6723			821.5	294.741			293.687	3.39272
		822	293.538			293.749	3.69461			822	297.592			293.742	3.15258			822	290.615			293.484	3.68708			822	291.843			293.639	3.36107			822	285.529			293.52	3.65663			822	288.533			293.694	3.3924
		822.5	292.977			293.754	3.69509			822.5	289.004			293.729	3.14222			822.5	291.829			293.504	3.6899			822.5	293.374			293.641	3.36038			822.5	301.017			293.548	3.63558			822.5	295.355			293.716	3.39423
		823	293.898			293.767	3.69674			823	293.514			293.753	3.12431			823	292.592			293.502	3.68846			823	295.909			293.647	3.36109			823	289.707			293.568	3.63438			823	298.22			293.67	3.37181
		823.5	296.041			293.757	3.69895			823.5	298.46			293.73	3.14351			823.5	294.684			293.489	3.69119			823.5	288.491			293.624	3.36128			823.5	291.837			293.559	3.63047			823.5	296.302			293.678	3.37156
		824	291.69			293.742	3.69579			824	290.667			293.706	3.12557			824	289.884			293.501	3.68569			824	292.964			293.638	3.34594			824	299.402			293.596	3.58558			824	295.624			293.689	3.37522
		824.5	290.351			293.756	3.69337			824.5	294.69			293.733	3.12285			824.5	294.696			293.519	3.68632			824.5	294.442			293.636	3.34638			824.5	291.819			293.557	3.54668			824.5	293.604			293.69	3.37465
		825	299.554			293.775	3.68553			825	297.187			293.739	3.12543			825	297.478			293.522	3.68589			825	293.112			293.613	3.35663			825	293.353			293.554	3.55005			825	293.898			293.705	3.38551
		825.5	293.44			293.738	3.66434			825.5	289.956			293.736	3.12269			825.5	293.124			293.51	3.68591			825.5	293.708			293.627	3.36032			825.5	298.251			293.564	3.54801			825.5	294.736			293.713	3.37479
		826	292.017			293.753	3.66951			826	298.718			293.75	3.11185			826	291.694			293.544	3.68352			826	291.501			293.614	3.3651			826	290.293			293.541	3.52478			826	290.414			293.722	3.38197
		826.5	293.287			293.738	3.68335			826.5	289.043			293.73	3.09237			826.5	295.322			293.526	3.68615			826.5	291.451			293.625	3.3618			826.5	299.611			293.539	3.52601			826.5	292.412			293.696	3.36724
		827	287.405			293.751	3.68622			827	292.946			293.774	3.08869			827	291.01			293.515	3.67717			827	292.8			293.664	3.38088			827	285.375			293.57	3.5505			827	292.664			293.672	3.36551
		827.5	294.36			293.791	3.66084			827.5	300.204			293.786	3.09026			827.5	294.515			293.529	3.68131			827.5	297.704			293.644	3.39748			827.5	297.504			293.555	3.53727			827.5	291.297			293.675	3.36782
		828	292.041			293.764	3.67648			828	290.144			293.77	3.06473			828	291.641			293.525	3.68351			828	299.509			293.612	3.38899			828	294.685			293.556	3.53663			828	292.384			293.681	3.36853
		828.5	290.468			293.795	3.68808			828.5	297.841			293.787	3.05395			828.5	291.909			293.527	3.68461			828.5	287.535			293.572	3.36693			828.5	290.325			293.55	3.52712			828.5	294.889			293.672	3.37031
		829	293.391			293.819	3.68173			829	296.785			293.756	3.04441			829	294.214			293.53	3.68325			829	295.038			293.571	3.36772			829	295.64			293.606	3.48595			829	295.154			293.679	3.37412
		829.5	293.655			293.806	3.68781			829.5	291.771			293.761	3.05088			829.5	286.509			293.528	3.6829			829.5	295.201			293.594	3.3935			829.5	291.488			293.59	3.47529			829.5	290.621			293.669	3.38662
		830	291.987			293.822	3.69454			830	293.854			293.767	3.0483			830	292.821			293.537	3.68046			830	291.549			293.585	3.39165			830	294.721			293.603	3.48337			830	296.156			293.705	3.41134
		830.5	293.692			293.822	3.69444			830.5	293.421			293.744	3.06429			830.5	290.999			293.529	3.68535			830.5	297.329			293.568	3.41043			830.5	296.306			293.612	3.47683			830.5	295.801			293.714	3.41104
		831	290.468			293.836	3.69933			831	296.406			293.741	3.0649			831	296.864			293.558	3.71318			831	292.043			293.569	3.41147			831	290.041			293.59	3.47793			831	293.623			293.712	3.41331
		831.5	297.025			293.833	3.70253			831.5	297.012			293.732	3.05972			831.5	292.817			293.589	3.67974			831.5	294.172			293.558	3.41902			831.5	293.067			293.592	3.47712			831.5	296.445			293.771	3.49336
		832	295.694			293.819	3.69569			832	289.986			293.709	3.05239			832	288.126			293.607	3.6842			832	295.602			293.566	3.42194			832	293.939			293.582	3.47667			832	286.988			293.741	3.51046
		832.5	293.729			293.839	3.71665			832.5	296.76			293.733	3.0418			832.5	294.465			293.622	3.67969			832.5	288.671			293.565	3.42139			832.5	290.88			293.572	3.47163			832.5	292.495			293.77	3.54637
		833	294.982			293.81	3.73988			833	290.96			293.696	3.04948			833	295.633			293.57	3.70626			833	303.193			293.577	3.40813			833	298.956			293.57	3.47406			833	295.057			293.771	3.54543
		833.5	296.898			293.827	3.75322			833.5	297.083			293.734	3.0624			833.5	288.76			293.609	3.73787			833.5	287.941			293.567	3.38122			833.5	290.609			293.574	3.47397			833.5	298.334			293.757	3.5415
		834	287.751			293.804	3.74877			834	302.195			293.75	3.08771			834	298.942			293.609	3.73783			834	292.908			293.588	3.35897			834	293.122			293.573	3.47389			834	298.976			293.768	3.55181
		834.5	298.84			293.857	3.73872			834.5	289.965			293.712	3.0297			834.5	291.265			293.623	3.74671			834.5	304.614			293.606	3.36527			834.5	301.158			293.604	3.47759			834.5	293.55			293.741	3.57263
		835	292.394			293.848	3.72853			835	297.37			293.767	3.06105			835	293.593			293.621	3.74548			835	287.989			293.579	3.29771			835	289.402			293.603	3.47547			835	298.873			293.756	3.58887
		835.5	294.774			293.825	3.75212			835.5	288.271			293.724	3.07042			835.5	295.124			293.615	3.75366			835.5	298.077			293.614	3.2752			835.5	301.889			293.611	3.47033			835.5	294.269			293.78	3.55875
		836	298.751			293.822	3.75163			836	291.406			293.745	3.04735			836	290.39			293.608	3.74515			836	293.329			293.6	3.26203			836	289.63			293.604	3.47255			836	294.361			293.785	3.55771
		836.5	291.761			293.804	3.73661			836.5	300.754			293.766	3.04612			836.5	291.93			293.603	3.74903			836.5	292.981			293.595	3.26311			836.5	289.042			293.571	3.43144			836.5	296.218			293.767	3.56033
		837	297.067			293.793	3.74593			837	290.363			293.719	3.01075			837	296.606			293.614	3.7523			837	299.591			293.611	3.26755			837	302.23			293.57	3.43214			837	291.451			293.727	3.55311
		837.5	294.937			293.794	3.74626			837.5	296.89			293.763	3.02709			837.5	291.465			293.613	3.7518			837.5	293.531			293.581	3.23994			837.5	286.201			293.54	3.38471			837.5	292.135			293.722	3.54679
		838	293.807			293.772	3.75242			838	294.011			293.735	3.02452			838	301.386			293.614	3.75092			838	294.374			293.555	3.26152			838	298.429			293.558	3.37335			838	291.794			293.723	3.54678
		838.5	295.868			293.756	3.759			838.5	291.629			293.688	3.09309			838.5	289.803			293.642	3.75952			838.5	297.242			293.563	3.26544			838.5	291.453			293.563	3.36755			838.5	287.678			293.69	3.52899
		839	293.653			293.753	3.75777			839	294.267			293.712	3.09549			839	293.097			293.61	3.76196			839	289.126			293.532	3.26003			839	289.616			293.514	3.31151			839	297.158			293.671	3.53588
		839.5	292.443			293.776	3.77053			839.5	293.683			293.72	3.09915			839.5	297.95			293.634	3.76396			839.5	294.866			293.555	3.2451			839.5	296.188			293.548	3.27075			839.5	288.541			293.661	3.53682
		840	291.774			293.788	3.77008			840	288.375			293.714	3.10039			840	287.645			293.604	3.72572			840	294.942			293.541	3.24548			840	289.276			293.517	3.25356			840	292.766			293.654	3.53302
		840.5	295.961			293.794	3.76782			840.5	297.843			293.754	3.0831			840.5	302.12			293.607	3.7232			840.5	293.194			293.529	3.24475			840.5	294.027			293.506	3.26495			840.5	300.119			293.667	3.52967
		841	294.356			293.781	3.7648			841	289.929			293.715	3.08081			841	288.977			293.637	3.74271			841	297.123			293.546	3.25174			841	299.584			293.523	3.25343			841	286.264			293.679	3.52848
		841.5	291.468			293.763	3.77071			841.5	295.012			293.749	3.07637			841.5	286.426			293.616	3.73017			841.5	287.775			293.528	3.24184			841.5	291.278			293.509	3.24791			841.5	301.238			293.681	3.52731
		842	301.762			293.769	3.76792			842	294.495			293.725	3.0851			842	294.875			293.638	3.70761			842	296.962			293.59	3.25036			842	296.483			293.561	3.26277			842	289.387			293.685	3.52223
		842.5	291.382			293.724	3.72571			842.5	291.314			293.725	3.08514			842.5	291.336			293.598	3.65845			842.5	295.696			293.573	3.24156			842.5	292.591			293.548	3.26613			842.5	293.239			293.67	3.51376
		843	296.311			293.763	3.74215			843	296.281			293.739	3.08057			843	300.282			293.625	3.64414			843	291.477			293.555	3.23976			843	290.869			293.497	3.25012			843	299.14			293.684	3.49846
		843.5	289.628			293.764	3.74255			843.5	292.719			293.716	3.07909			843.5	291.205			293.663	3.60807			843.5	298.057			293.597	3.26614			843.5	295.318			293.518	3.24915			843.5	290.023			293.692	3.49813
		844	298.19			293.772	3.73491			844	294.633			293.717	3.07883			844	290.665			293.661	3.60759			844	291.461			293.574	3.25083			844	284.658			293.495	3.24452			844	294.379			293.657	3.46829
		844.5	297.149			293.742	3.72372			844.5	296.066			293.705	3.07967			844.5	303.289			293.671	3.60392			844.5	299.342			293.571	3.2524			844.5	297.307			293.501	3.24394			844.5	295.95			293.688	3.42896
		845	292.975			293.732	3.71726			845	293.776			293.721	3.09946			845	287.501			293.622	3.5803			845	298.057			293.548	3.2274			845	293.705			293.501	3.24379			845	290.828			293.686	3.42369
		845.5	294.07			293.748	3.7211			845.5	296.527			293.722	3.09955			845.5	294.731			293.628	3.57699			845.5	290.945			293.538	3.21665			845.5	292.202			293.496	3.24187			845.5	297.53			293.69	3.41926
		846	293.084			293.757	3.72412			846	294.116			293.685	3.11128			846	296.252			293.647	3.57127			846	299.692			293.578	3.23355			846	296.994			293.552	3.18462			846	291.605			293.702	3.42182
		846.5	290.488			293.758	3.72398			846.5	294.677			293.689	3.11243			846.5	286.839			293.591	3.50665			846.5	290.565			293.537	3.20761			846.5	291.691			293.555	3.1885			846.5	294.747			293.678	3.40015
		847	290.348			293.808	3.74636			847	292.247			293.704	3.12508			847	296.298			293.642	3.492			847	298.654			293.559	3.20224			847	296.101			293.531	3.20529			847	295.732			293.671	3.40825
		847.5	289.998			293.792	3.76765			847.5	288.438			293.697	3.12969			847.5	287.439			293.626	3.49449			847.5	290.247			293.56	3.20391			847.5	294.365			293.563	3.22261			847.5	292.68			293.67	3.40801
		848	294.826			293.811	3.75804			848	294.047			293.732	3.10946			848	293.37			293.623	3.49223			848	291.535			293.562	3.20136			848	294.71			293.551	3.21441			848	295.346			293.67	3.4084
		848.5	287.878			293.817	3.76066			848.5	290.134			293.714	3.11737			848.5	294.489			293.647	3.46166			848.5	295.875			293.553	3.21055			848.5	299.903			293.552	3.21397			848.5	289.125			293.676	3.4044
		849	294.339			293.83	3.74517			849	294.644			293.762	3.13545			849	285.592			293.609	3.47411			849	291.887			293.549	3.20825			849	291.998			293.553	3.2148			849	292.177			293.665	3.39504
		849.5	295.102			293.852	3.76214			849.5	293.982			293.725	3.16802			849.5	296.212			293.663	3.46243			849.5	295.701			293.558	3.20612			849.5	295.391			293.527	3.22884			849.5	297.015			293.651	3.40943
		850	293.308			293.823	3.7749			850	289.713			293.726	3.16805			850	291.488			293.641	3.47803			850	292.436			293.533	3.20889			850	295.546			293.548	3.24955			850	288.241			293.656	3.41194
		850.5	300.406			293.823	3.77498			850.5	293.016			293.723	3.17217			850.5	291.654			293.638	3.47752			850.5	290.869			293.531	3.20989			850.5	286.499			293.502	3.22391			850.5	298.535			293.635	3.41189
		851	296.151			293.8	3.74876			851	297.52			293.726	3.17178			851	301.452			293.688	3.43295			851	291.826			293.534	3.20753			851	300.635			293.512	3.22236			851	298.302			293.66	3.42324
		851.5	296.46			293.768	3.7565			851.5	295.345			293.711	3.16092			851.5	287.833			293.666	3.43066			851.5	292.06			293.544	3.20537			851.5	292.536			293.524	3.23284			851.5	288.339			293.684	3.45252
		852	294.881			293.779	3.76841			852	299.274			293.694	3.16133			852	302.353			293.695	3.43619			852	296.621			293.553	3.20372			852	295.177			293.498	3.23683			852	295.439			293.71	3.4374
		852.5	292.491			293.757	3.77529			852.5	293.747			293.67	3.13689			852.5	292.324			293.679	3.43507			852.5	295.102			293.526	3.20085			852.5	295.998			293.52	3.24304			852.5	296.58			293.729	3.43942
		853	285.961			293.75	3.77874			853	292.25			293.659	3.14052			853	292.75			293.665	3.44837			853	291.861			293.534	3.20666			853	289.241			293.567	3.20922			853	289.472			293.707	3.43233
		853.5	301.315			293.816	3.75783			853.5	293.63			293.672	3.14011			853.5	298.003			293.66	3.43607			853.5	293.33			293.557	3.21143			853.5	292.106			293.519	3.17466			853.5	295.616			293.737	3.41034
		854	289.519			293.754	3.73555			854	293.712			293.67	3.14023			854	286.351			293.677	3.4151			854	292.263			293.555	3.21171			854	292.767			293.536	3.17805			854	290.835			293.742	3.40255
		854.5	291.613			293.807	3.74976			854.5	292.609			293.674	3.14081			854.5	296.102			293.652	3.36924			854.5	294.05			293.558	3.21084			854.5	291.877			293.52	3.17759			854.5	295.042			293.726	3.40219
		855	299.518			293.834	3.75363			855	296.027			293.689	3.14251			855	296.898			293.664	3.36866			855	287.97			293.575	3.22308			855	295.657			293.521	3.17813			855	297.179			293.719	3.39402
		855.5	292.186			293.815	3.73421			855.5	292.434			293.679	3.13827			855.5	288.247			293.677	3.37057			855.5	297.229			293.611	3.20017			855.5	284.971			293.552	3.16639			855.5	290.211			293.695	3.37849
		856	303.953			293.851	3.75274			856	290.237			293.683	3.13725			856	301.204			293.655	3.35659			856	296.204			293.579	3.19541			856	294.112			293.549	3.16763			856	299.495			293.711	3.36013
		856.5	291.573			293.771	3.70608			856.5	295.417			293.71	3.13105			856.5	287.553			293.677	3.32342			856.5	288.358			293.598	3.22231			856.5	291.863			293.575	3.18265			856.5	287.618			293.692	3.36132
		857	290.957			293.776	3.70377			857	289.286			293.708	3.13022			857	294.238			293.65	3.32566			857	295.718			293.606	3.21108			857	296.289			293.565	3.19088			857	294.523			293.682	3.35564
		857.5	305.234			293.799	3.70039			857.5	296.685			293.705	3.13486			857.5	297.77			293.644	3.32124			857.5	293.629			293.604	3.20949			857.5	295.467			293.539	3.19506			857.5	299.62			293.709	3.34344
		858	285.455			293.747	3.61119			858	292.549			293.698	3.12977			858	290.341			293.662	3.30186			858	294.736			293.608	3.2101			858	293.971			293.602	3.1489			858	292.825			293.71	3.34427
		858.5	298.398			293.794	3.56398			858.5	292.503			293.684	3.14151			858.5	297.714			293.646	3.27246			858.5	297.701			293.588	3.21556			858.5	299.102			293.59	3.15136			858.5	295.296			293.716	3.34049
		859	288.768			293.78	3.55137			859	304.129			293.706	3.14853			859	294.045			293.66	3.25203			859	294.502			293.571	3.20274			859	288.824			293.609	3.15215			859	302.664			293.682	3.36164
		859.5	285.647			293.782	3.54892			859.5	284.355			293.647	3.06207			859.5	287.376			293.665	3.25385			859.5	293.027			293.562	3.20265			859.5	295.303			293.606	3.14998			859.5	293.125			293.655	3.35483
		860	295.717			293.823	3.50176			860	294.308			293.669	3.00975			860	302.756			293.67	3.26041			860	290.981			293.564	3.20243			860	294.167			293.562	3.18505			860	290.436			293.714	3.39705
		860.5	294.901			293.8	3.50445			860.5	300.329			293.673	3.01108			860.5	288.014			293.69	3.25225			860.5	293.912			293.586	3.19941			860.5	289.714			293.583	3.20163			860.5	293.142			293.653	3.40253
		861	293.803			293.765	3.52717			861	290.158			293.62	2.98755			861	298.239			293.695	3.25881			861	297.424			293.556	3.22458			861	296.401			293.525	3.20596			861	294.064			293.686	3.37575
		861.5	291.625			293.782	3.53548			861.5	298.285			293.61	3.00291			861.5	291.332			293.666	3.28039			861.5	283.976			293.562	3.2333			861.5	291.547			293.565	3.19643			861.5	292.273			293.674	3.37706
		862	288.883			293.77	3.54763			862	295.306			293.608	2.99975			862	288.673			293.699	3.24997			862	302.793			293.605	3.16186			862	286.5			293.565	3.1964			862	291.965			293.619	3.3706
		862.5	297.224			293.789	3.53147			862.5	289.464			293.593	2.99856			862.5	296.269			293.648	3.18686			862.5	291.545			293.536	3.11095			862.5	295.759			293.532	3.22405			862.5	295.799			293.65	3.39309
		863	301.339			293.797	3.54117			863	298.009			293.608	2.98549			863	290.935			293.654	3.17707			863	290.071			293.559	3.11301			863	290.554			293.559	3.21493			863	295.518			293.628	3.39709
		863.5	293.428			293.769	3.5032			863.5	294.151			293.591	2.9703			863.5	292.637			293.641	3.16357			863.5	297.603			293.567	3.10588			863.5	291.113			293.525	3.22105			863.5	294.2			293.61	3.35784
		864	290.917			293.759	3.50714			864	292.87			293.574	2.977			864	294.593			293.645	3.16107			864	284.936			293.542	3.09334			864	292.171			293.53	3.21877			864	293.856			293.591	3.37037
		864.5	293.841			293.75	3.51598			864.5	294.058			293.604	2.99922			864.5	292.986			293.652	3.15211			864.5	292.066			293.586	3.03258			864.5	292.138			293.586	3.19361			864.5	292.478			293.601	3.36423
		865	291.694			293.755	3.51672			865	295.522			293.591	3.00304			865	297.939			293.652	3.15256			865	294.052			293.56	3.06688			865	294.112			293.583	3.19202			865	292.921			293.612	3.36676
		865.5	301.058			293.766	3.51369			865.5	294.621			293.574	3.00135			865.5	290.555			293.662	3.14729			865.5	291.682			293.569	3.07065			865.5	293.081			293.625	3.20698			865.5	293.822			293.61	3.36661
		866	287.529			293.72	3.47812			866	287.781			293.567	3.00063			866	294.796			293.678	3.15032			866	299.899			293.566	3.07244			866	294.088			293.622	3.21			866	294.474			293.606	3.36861
		866.5	293.336			293.753	3.4505			866.5	296.612			293.583	2.97755			866.5	294.8			293.661	3.15475			866.5	289.46			293.541	3.04102			866.5	297.922			293.625	3.20896			866.5	293.039			293.613	3.36664
		867	295.465			293.771	3.4581			867	290.348			293.559	2.97254			867	288.929			293.637	3.17724			867	293.306			293.546	3.03531			867	291.997			293.634	3.20742			867	293.87			293.592	3.36634
		867.5	288.489			293.743	3.46759			867.5	295.087			293.589	2.97006			867.5	294.962			293.618	3.16272			867.5	294.486			293.546	3.03535			867.5	298.186			293.646	3.21332			867.5	292.677			293.576	3.36479
		868	295.606			293.803	3.48066			868	298.21			293.569	2.97327			868	292.11			293.623	3.15871			868	293.482			293.525	3.04299			868	292.343			293.647	3.21319			868	289.971			293.588	3.37205
		868.5	293.065			293.79	3.47872			868.5	294.88			293.541	2.95594			868.5	290.805			293.631	3.16381			868.5	298.48			293.53	3.04375			868.5	294.123			293.646	3.21306			868.5	294.522			293.58	3.37336
		869	287.053			293.798	3.47874			869	295.247			293.517	2.9639			869	294.105			293.595	3.1903			869	290.464			293.522	3.03269			869	296.139			293.612	3.20351			869	296.92			293.589	3.37272
		869.5	300.39			293.817	3.45178			869.5	291.277			293.524	2.96893			869.5	287.616			293.601	3.18296			869.5	292.706			293.54	3.02511			869.5	289.56			293.639	3.21295			869.5	289.059			293.582	3.37544
		870	286.679			293.798	3.42572			870	295.602			293.565	2.99596			870	299.969			293.598	3.18206			870	297.123			293.54	3.02505			870	293.99			293.629	3.2017			870	289.086			293.565	3.38276
		870.5	295.227			293.853	3.39922			870.5	294.954			293.539	3.00098			870.5	299.288			293.592	3.1866			870.5	292.121			293.533	3.01848			870.5	294.876			293.646	3.20425			870.5	291.641			293.585	3.39935
		871	298.985			293.852	3.39895			871	290.206			293.549	3.0085			871	290.833			293.605	3.18049			871	296.562			293.543	3.01712			871	288.58			293.621	3.22043			871	291.395			293.572	3.40616
		871.5	290.198			293.814	3.38372			871.5	288.618			293.581	3.0068			871.5	294.269			293.599	3.1806			871.5	289.431			293.525	3.00978			871.5	292.218			293.6	3.21758			871.5	294.44			293.585	3.41218
		872	297.62			293.827	3.37485			872	293.617			293.603	2.98639			872	292.106			293.641	3.15699			872	290.408			293.559	3.00147			872	289.177			293.615	3.20569			872	291.532			293.607	3.42062
		872.5	292.714			293.826	3.37364			872.5	290.005			293.633	3.01708			872.5	296.917			293.606	3.12543			872.5	299.339			293.58	2.99429			872.5	296.767			293.584	3.23162			872.5	291.423			293.597	3.43426
		873	291.229			293.819	3.37752			873	295.891			293.618	3.04349			873	291.155			293.566	3.10383			873	290.902			293.573	2.98208			873	293.368			293.566	3.23509			873	293.369			293.618	3.45325
		873.5	302.403			293.853	3.3863			873.5	294.518			293.59	3.04809			873.5	291.273			293.588	3.10035			873.5	298.188			293.591	2.97676			873.5	299.002			293.609	3.2264			873.5	286.145			293.594	3.447
		874	291.116			293.797	3.33681			874	294.295			293.59	3.04832			874	298.701			293.592	3.10137			874	290.93			293.591	2.9774			874	299.053			293.603	3.23022			874	299.907			293.614	3.43226
		874.5	293.285			293.797	3.3369			874.5	293.459			293.567	3.06134			874.5	292.383			293.573	3.12142			874.5	289.313			293.609	2.97212			874.5	289.392			293.629	3.21538			874.5	289.517			293.65	3.42264
		875	295.392			293.833	3.37056			875	298.364			293.553	3.06796			875	294.652			293.562	3.11364			875	295.498			293.64	2.95933			875	293.808			293.585	3.23235			875	297.556			293.645	3.4262
		875.5	289.489			293.792	3.40148			875.5	293.744			293.535	3.05017			875.5	296.571			293.551	3.12699			875.5	292.846			293.637	2.95779			875.5	292.481			293.585	3.23237			875.5	294.5			293.676	3.43369
		876	299.026			293.818	3.38837			876	289.352			293.519	3.05736			876	291.552			293.531	3.15344			876	293.196			293.642	2.9573			876	290.413			293.6	3.26608			876	289.114			293.675	3.43355
		876.5	294.875			293.792	3.3682			876.5	295.37			293.542	3.04315			876.5	299.316			293.513	3.13392			876.5	297.891			293.654	2.96053			876.5	292.39			293.522	3.32371			876.5	301.929			293.683	3.43047
		877	290.919			293.748	3.41146			877	295.744			293.528	3.04114			877	292.488			293.499	3.14518			877	291.202			293.63	2.94565			877	299.439			293.575	3.34353			877	289.896			293.708	3.43287
		877.5	296.859			293.802	3.45199			877.5	292.924			293.524	3.03872			877.5	289.8			293.484	3.14698			877.5	297.071			293.631	2.9446			877.5	288.147			293.542	3.37355			877.5	294.38			293.698	3.43684
		878	292.147			293.773	3.45023			878	292.108			293.52	3.03996			878	291.485			293.465	3.13968			878	294.869			293.621	2.93631			878	295.646			293.537	3.37632			878	292.791			293.78	3.45021
		878.5	296.823			293.781	3.4483			878.5	294.656			293.515	3.04317			878.5	291.16			293.46	3.14415			878.5	289.203			293.635	2.94818			878.5	295.052			293.591	3.41385			878.5	296.255			293.755	3.42388
		879	296.75			293.803	3.48047			879	295.479			293.516	3.04343			879	297.07			293.453	3.1325			879	297.741			293.654	2.93172			879	290.927			293.585	3.41683			879	298.243			293.779	3.41093
		879.5	287.192			293.756	3.50324			879.5	290.639			293.491	3.04735			879.5	292.341			293.474	3.14059			879.5	294.65			293.655	2.93343			879.5	302.489			293.57	3.39703			879.5	293.954			293.767	3.40165
		880	298.048			293.799	3.47502			880	295.577			293.512	3.0423			880	291.478			293.481	3.13407			880	297.24			293.632	2.94312			880	288.05			293.596	3.37522			880	292.544			293.753	3.40425
		880.5	286.97			293.783	3.46293			880.5	295.387			293.492	3.04227			880.5	293.539			293.508	3.14089			880.5	298.84			293.632	2.94239			880.5	297.786			293.582	3.37264			880.5	301.754			293.767	3.39106
		881	293.103			293.783	3.46413			881	290.848			293.476	3.04059			881	291.347			293.508	3.14091			881	294.652			293.564	2.97821			881	297.051			293.594	3.38237			881	296.996			293.731	3.34224
		881.5	291.33			293.838	3.54061			881.5	293.994			293.486	3.03525			881.5	289.229			293.478	3.13599			881.5	293.682			293.55	2.97964			881.5	288.897			293.623	3.38476			881.5	289.314			293.749	3.3312
		882	285.257			293.854	3.53659			882	289.383			293.473	3.03891			882	294.36			293.479	3.1355			882	290.398			293.537	2.98491			882	299.138			293.595	3.33321			882	293.679			293.726	3.34317
		882.5	294.577			293.871	3.50431			882.5	296.031			293.501	3.02726			882.5	291.503			293.456	3.16832			882.5	289.405			293.588	3.01782			882.5	287.508			293.621	3.31001			882.5	291.221			293.705	3.36214
		883	295.005			293.885	3.51273			883	289.854			293.464	3.04244			883	295.182			293.457	3.16837			883	296.064			293.61	3.00331			883	292.257			293.635	3.33364			883	286.945			293.672	3.37009
		883.5	290.801			293.83	3.57923			883.5	289.675			293.503	3.0466			883.5	291.808			293.436	3.19636			883.5	291.563			293.597	2.99828			883.5	294.592			293.614	3.32523			883.5	294.148			293.658	3.35705
		884	296.64			293.854	3.57467			884	296.412			293.516	3.03588			884	298.355			293.445	3.18663			884	295.242			293.597	2.9982			884	287.971			293.622	3.31608			884	292.791			293.65	3.35813
		884.5	295.945			293.834	3.5702			884.5	292.398			293.487	3.03528			884.5	294.137			293.452	3.19022			884.5	289.429			293.579	2.99947			884.5	303.006			293.612	3.30244			884.5	297.616			293.682	3.37782
		885	296.01			293.794	3.59146			885	298.394			293.519	3.05741			885	291.912			293.416	3.25233			885	293.811			293.614	2.99206			885	291.316			293.616	3.2959			885	298.522			293.625	3.33759
		885.5	294.052			293.788	3.58878			885.5	290.039			293.486	3.04031			885.5	291.172			293.404	3.25034			885.5	298.42			293.601	2.99664			885.5	290.156			293.647	3.3126			885.5	289.999			293.602	3.33033
		886	288.262			293.749	3.62891			886	294.739			293.492	3.03456			886	296.066			293.393	3.25965			886	290.821			293.574	2.97745			886	293.252			293.639	3.31218			886	296.787			293.616	3.31779
		886.5	294.481			293.774	3.60817			886.5	296.43			293.512	3.05518			886.5	298.492			293.37	3.24077			886.5	296.345			293.621	3.00903			886.5	291.71			293.646	3.30225			886.5	292.947			293.601	3.3249
		887	292.691			293.756	3.61348			887	292.445			293.5	3.0485			887	294.768			293.365	3.24038			887	294.858			293.585	3.02096			887	294.912			293.613	3.24077			887	293.672			293.614	3.32066
		887.5	299.464			293.731	3.6376			887.5	291.851			293.527	3.06308			887.5	288.861			293.376	3.23933			887.5	292.771			293.59	3.02416			887.5	293.475			293.627	3.23687			887.5	293.436			293.658	3.29026
		888	293.377			293.721	3.62444			888	293.687			293.533	3.06101			888	296.379			293.398	3.23911			888	291.942			293.608	3.03016			888	298.168			293.647	3.22785			888	289.046			293.66	3.29059
		888.5	291.242			293.742	3.63411			888.5	294.811			293.531	3.06107			888.5	296.275			293.395	3.23664			888.5	288.545			293.614	3.02803			888.5	294.016			293.647	3.22789			888.5	293.733			293.65	3.29587
		889	302.051			293.761	3.63128			889	298.241			293.526	3.05977			889	288.389			293.365	3.21692			889	292.176			293.665	3.02833			889	292.335			293.66	3.22537			889	295.047			293.635	3.28468
		889.5	286.443			293.762	3.63321			889.5	295.898			293.496	3.0426			889.5	301.697			293.363	3.21613			889.5	291.318			293.667	3.02729			889.5	297.625			293.657	3.22447			889.5	293.804			293.607	3.26695
		890	298.433			293.766	3.62641			890	288.89			293.473	3.04225			890	291.515			293.375	3.20354			890	290.296			293.687	3.02456			890	289.912			293.67	3.22888			890	297.078			293.626	3.25695
		890.5	293.067			293.76	3.62015			890.5	302.529			293.493	3.025			890.5	294.528			293.374	3.20211			890.5	297.274			293.709	3.01594			890.5	294.345			293.633	3.2197			890.5	290.138			293.586	3.26645
		891	293.069			293.756	3.62148			891	288.053			293.451	2.95663			891	292.994			293.357	3.19565			891	292.583			293.688	3.00571			891	294.314			293.639	3.22173			891	295.379			293.618	3.29111
		891.5	293.189			293.741	3.63081			891.5	291.718			293.492	2.9392			891.5	290.375			293.359	3.19219			891.5	292.546			293.698	3.00542			891.5	299.093			293.646	3.22041			891.5	295.283			293.59	3.31475
		892	288.659			293.723	3.64234			892	294.802			293.5	2.93656			892	297.772			293.332	3.14365			892	295.755			293.667	3.04905			892	292.383			293.638	3.21303			892	287.76			293.614	3.33127
		892.5	289.136			293.735	3.62971			892.5	291.289			293.478	2.94362			892.5	291.888			293.33	3.14512			892.5	288.443			293.67	3.05111			892.5	296.503			293.669	3.20691			892.5	295.41			293.645	3.31749
		893	297.065			293.755	3.61519			893	293.214			293.516	2.96541			893	295.248			293.345	3.15774			893	298.627			293.678	3.03951			893	290.42			293.672	3.20764			893	291.18			293.637	3.31893
		893.5	295.209			293.744	3.60839			893.5	295.013			293.476	3.02503			893.5	297.266			293.365	3.16904			893.5	290.225			293.639	3.02576			893.5	294.654			293.649	3.21957			893.5	294.521			293.661	3.34652
		894	292.737			293.73	3.60818			894	288.573			293.464	3.0235			894	292.502			293.365	3.16978			894	297.051			293.698	3.0739			894	291.369			293.644	3.21145			894	293.634			293.664	3.34682
		894.5	292.992			293.732	3.60782			894.5	295.193			293.508	3.01564			894.5	296.495			293.369	3.17699			894.5	289.95			293.644	3.11043			894.5	293.03			293.627	3.2258			894.5	292.52			293.635	3.34214
		895	287.022			293.733	3.60761			895	291.698			293.463	3.05789			895	288.549			293.369	3.17711			895	290.934			293.688	3.12042			895	294.197			293.632	3.23089			895	296.091			293.674	3.34605
		895.5	300.272			293.756	3.57922			895.5	295.645			293.497	3.07615			895.5	293.612			293.38	3.18719			895.5	301.881			293.704	3.11451			895.5	295.932			293.655	3.22418			895.5	293.467			293.648	3.35221
		896	293.473			293.718	3.55016			896	299.03			293.473	3.07765			896	294.055			293.365	3.17589			896	289.183			293.645	3.07025			896	286.754			293.654	3.22398			896	292.505			293.657	3.35818
		896.5	289.415			293.744	3.56798			896.5	292.067			293.454	3.05496			896.5	289.771			293.365	3.17599			896.5	294.468			293.667	3.05393			896.5	295.042			293.692	3.2408			896.5	297.737			293.681	3.33276
		897	298.483			293.786	3.56636			897	299.105			293.451	3.05708			897	296.875			293.372	3.18502			897	292.844			293.641	3.06984			897	289.291			293.684	3.244			897	292.596			293.67	3.33076
		897.5	294.939			293.751	3.55475			897.5	290.038			293.394	3.05648			897.5	294.605			293.388	3.16853			897.5	293.378			293.625	3.08191			897.5	294.777			293.699	3.25283			897.5	288.763			293.716	3.36047
		898	294.883			293.746	3.55377			898	294.653			293.412	3.04723			898	294.158			293.385	3.16859			898	296.594			293.631	3.08265			898	292.491			293.71	3.26471			898	294.761			293.7	3.36396
		898.5	296.997			293.741	3.55291			898.5	295.064			293.415	3.04885			898.5	296.231			293.379	3.16846			898.5	292.643			293.602	3.08248			898.5	294.19			293.728	3.23608			898.5	294.729			293.716	3.37039
		899	290.091			293.701	3.5617			899	293.692			293.399	3.04898			899	293.067			293.4	3.15833			899	292.988			293.633	3.10486			899	295.657			293.741	3.24655			899	295.511			293.734	3.37374
		899.5	294.764			293.739	3.56404			899.5	296.687			293.417	3.06185			899.5	299.172			293.37	3.1539			899.5	295.402			293.642	3.10575			899.5	287.586			293.738	3.25083			899.5	290.015			293.702	3.38182
		900	294.783			293.724	3.56604			900	286.278			293.405	3.05386			900	294.172			293.359	3.15348			900	295.922			293.632	3.10333			900	295.385			293.749	3.25805			900	294.701			293.711	3.38371
		900.5	293.765			293.737	3.57441			900.5	294.875			293.425	3.02052			900.5	293.996			293.35	3.15379			900.5	294.155			293.661	3.15148			900.5	291.294			293.766	3.26026			900.5	292.765			293.719	3.38273
		901	289.773			293.69	3.63589			901	294.898			293.433	3.02679			901	294.757			293.342	3.14881			901	293.199			293.634	3.17094			901	296.96			293.748	3.26774			901	294.845			293.696	3.37099
		901.5	293.651			293.703	3.6266			901.5	292.054			293.392	3.06349			901.5	289.518			293.348	3.14923			901.5	296.497			293.656	3.18428			901.5	293.325			293.742	3.26524			901.5	293.841			293.708	3.37152
		902	293.023			293.687	3.63326			902	295.17			293.386	3.06705			902	294.058			293.327	3.12452			902	291.876			293.674	3.20902			902	291.38			293.769	3.23632			902	302.546			293.73	3.35352
		902.5	293.69			293.649	3.67975			902.5	290.661			293.367	3.06773			902.5	297.869			293.292	3.15542			902.5	291.679			293.644	3.25339			902.5	296.915			293.764	3.23469			902.5	292.905			293.719	3.3537
		903	295.484			293.673	3.69578			903	293.93			293.381	3.06172			903	284.721			293.291	3.15522			903	288.377			293.675	3.26392			903	292.147			293.768	3.23219			903	297.908			293.713	3.35295
		903.5	291.369			293.672	3.69529			903.5	295.129			293.408	3.09147			903.5	295.135			293.277	3.15471			903.5	290.038			293.673	3.2659			903.5	293.102			293.761	3.22666			903.5	290.536			293.708	3.35092
		904	292.913			293.673	3.6949			904	291.243			293.389	3.093			904	296.247			293.294	3.14359			904	293.317			293.676	3.26348			904	292.99			293.776	3.23139			904	285.942			293.737	3.34403
		904.5	290.704			293.701	3.71022			904.5	294.26			293.409	3.09258			904.5	291.965			293.318	3.16919			904.5	295.083			293.718	3.31405			904.5	293.876			293.776	3.23124			904.5	296.581			293.71	3.35708
		905	292.335			293.689	3.72319			905	292.656			293.385	3.10548			905	296.199			293.288	3.15467			905	294.443			293.685	3.33335			905	293.209			293.745	3.2314			905	292.752			293.704	3.36044
		905.5	296.492			293.699	3.72214			905.5	290.306			293.375	3.1108			905.5	292.891			293.337	3.09687			905.5	294.37			293.706	3.35071			905.5	292.984			293.785	3.26156			905.5	293.679			293.66	3.40173
		906	291.975			293.706	3.72899			906	293.665			293.413	3.11989			906	293.609			293.326	3.09436			906	295.391			293.703	3.3504			906	295.073			293.759	3.28766			906	289.984			293.667	3.4033
		906.5	293.479			293.68	3.7593			906.5	294.379			293.39	3.13498			906.5	293.234			293.319	3.08922			906.5	298.387			293.694	3.34827			906.5	295.206			293.784	3.30173			906.5	289.467			293.618	3.34501
		907	295.575			293.699	3.76773			907	297.911			293.379	3.13532			907	289.31			293.323	3.08796			907	289.954			293.668	3.33198			907	297.246			293.791	3.3031			907	293.548			293.627	3.34547
		907.5	295.513			293.676	3.77022			907.5	295.225			293.371	3.1255			907.5	297.45			293.33	3.09621			907.5	295.951			293.66	3.34243			907.5	293.969			293.775	3.31296			907.5	291.97			293.607	3.33172
		908	299.901			293.667	3.76797			908	291.363			293.307	3.21632			908	296.474			293.352	3.10883			908	292.777			293.639	3.34123			908	288.622			293.787	3.31408			908	295.475			293.604	3.33482
		908.5	293.519			293.647	3.74546			908.5	292.061			293.35	3.24682			908.5	291.731			293.361	3.1118			908.5	294.348			293.636	3.34228			908.5	291.06			293.799	3.32371			908.5	293.096			293.618	3.30784
		909	293.477			293.633	3.75083			909	293.054			293.33	3.26749			909	297.746			293.349	3.11636			909	294.324			293.605	3.36402			909	298.639			293.769	3.33863			909	290.742			293.593	3.3045
		909.5	299.099			293.614	3.76112			909.5	295.763			293.321	3.27031			909.5	289.198			293.358	3.1075			909.5	295.091			293.563	3.40803			909.5	289.369			293.764	3.33453			909.5	294.175			293.613	3.31156
		910	294.205			293.581	3.74198			910	292.122			293.324	3.27219			910	288.131			293.369	3.12654			910	297.961			293.542	3.41176			910	299.209			293.757	3.33577			910	292.806			293.598	3.31846
		910.5	295.195			293.581	3.74208			910.5	293.636			293.304	3.29089			910.5	297.05			293.327	3.14219			910.5	293.418			293.51	3.39999			910.5	290.535			293.789	3.31727			910.5	298.097			293.623	3.3102
		911	289.547			293.576	3.74051			911	292.02			293.319	3.29913			911	293.036			293.342	3.14206			911	290.117			293.506	3.40065			911	294.171			293.811	3.31379			911	291.798			293.671	3.32005
		911.5	291.319			293.592	3.73012			911.5	295.553			293.304	3.312			911.5	293.152			293.304	3.13467			911.5	292.317			293.519	3.3925			911.5	293.507			293.779	3.29837			911.5	288.388			293.645	3.34133
		912	298.725			293.603	3.72664			912	292.36			293.309	3.31564			912	293.171			293.309	3.12955			912	293.891			293.524	3.3915			912	288.828			293.787	3.28895			912	296.973			293.647	3.34063
		912.5	289.671			293.598	3.71972			912.5	291.833			293.33	3.32331			912.5	287.677			293.321	3.11399			912.5	295.162			293.504	3.4015			912.5	290.602			293.757	3.2668			912.5	294.66			293.664	3.35862
		913	294.476			293.613	3.70984			913	290.481			293.328	3.32443			913	300.345			293.306	3.10324			913	289.47			293.462	3.43197			913	297.051			293.771	3.25887			913	301.142			293.658	3.36045
		913.5	288.653			293.595	3.71428			913.5	294.523			293.344	3.3184			913.5	291.773			293.315	3.10517			913.5	295.191			293.483	3.42031			913.5	293.114			293.789	3.27117			913.5	289.265			293.69	3.36308
		914	291.588			293.602	3.70608			914	290.236			293.353	3.32426			914	292.105			293.297	3.11721			914	290.342			293.487	3.42243			914	292.519			293.764	3.29368			914	291.588			293.688	3.36291
		914.5	293.821			293.584	3.72452			914.5	295.729			293.372	3.31732			914.5	295.469			293.301	3.11758			914.5	291.607			293.512	3.41789			914.5	295.886			293.805	3.28409			914.5	294.59			293.688	3.36303
		915	291.924			293.595	3.72842			915	295.898			293.355	3.31402			915	292.928			293.337	3.09393			915	291.641			293.533	3.4191			915	286.868			293.808	3.28215			915	288.493			293.68	3.3544
		915.5	301.164			293.634	3.75131			915.5	290.105			293.353	3.3127			915.5	295.843			293.311	3.05685			915.5	289.203			293.505	3.45738			915.5	297.185			293.794	3.27425			915.5	298.074			293.685	3.35218
		916	292.818			293.601	3.71376			916	292.214			293.347	3.31924			916	292.066			293.316	3.0552			916	294.446			293.538	3.4481			916	293.041			293.815	3.28405			916	297.486			293.721	3.33345
		916.5	295.707			293.602	3.71355			916.5	293.14			293.387	3.35259			916.5	292.138			293.288	3.09296			916.5	292.098			293.513	3.46059			916.5	290.894			293.815	3.28404			916.5	289.007			293.705	3.32547
		917	296.633			293.604	3.71471			917	291.523			293.373	3.35977			917	294.723			293.275	3.08917			917	295.728			293.519	3.45918			917	294.139			293.798	3.28216			917	297.991			293.702	3.32494
		917.5	291.5			293.57	3.71839			917.5	296.436			293.374	3.35899			917.5	288.706			293.295	3.0997			917.5	296.21			293.544	3.4942			917.5	295.178			293.842	3.24802			917.5	289.49			293.684	3.29434
		918	294.028			293.56	3.72684			918	293.613			293.391	3.38317			918	296.075			293.279	3.09471			918	290.494			293.488	3.54213			918	292.26			293.809	3.24774			918	294.281			293.687	3.29127
		918.5	292.131			293.563	3.72764			918.5	295.264			293.367	3.39951			918.5	296.471			293.3	3.10059			918.5	294.992			293.505	3.5359			918.5	297.707			293.816	3.24753			918.5	296.128			293.694	3.28826
		919	292.328			293.555	3.73235			919	292.247			293.378	3.40958			919	290.904			293.311	3.10039			919	292.623			293.5	3.53456			919	293.75			293.798	3.27424			919	290.759			293.688	3.28769
		919.5	294.515			293.556	3.73199			919.5	288.688			293.415	3.43762			919.5	295.644			293.302	3.09891			919.5	295.191			293.514	3.53629			919.5	294.97			293.794	3.27427			919.5	294.371			293.693	3.28098
		920	292.866			293.542	3.73367			920	293.37			293.422	3.42925			920	289.211			293.373	3.15696			920	295.131			293.538	3.56511			920	291.191			293.776	3.27657			920	295.898			293.676	3.26711
		920.5	295.096			293.518	3.7541			920.5	293.374			293.463	3.47732			920.5	295.974			293.331	3.1772			920.5	288.55			293.514	3.57091			920.5	293.757			293.777	3.27611			920.5	291.448			293.645	3.26045
		921	294.69			293.521	3.75575			921	298.149			293.451	3.48182			921	296.549			293.342	3.191			921	294.619			293.541	3.55376			921	295.254			293.772	3.27045			921	297.651			293.657	3.2477
		921.5	295.951			293.508	3.75619			921.5	289.723			293.432	3.46637			921.5	291.422			293.377	3.20308			921.5	292.107			293.515	3.5655			921.5	294.326			293.738	3.3055			921.5	290.183			293.646	3.23706
		922	290.999			293.518	3.76444			922	297.343			293.462	3.46076			922	293.02			293.34	3.21975			922	289			293.508	3.56991			922	293.009			293.757	3.32358			922	297.223			293.663	3.22408
		922.5	294.627			293.521	3.76252			922.5	295.086			293.425	3.45884			922.5	295.446			293.38	3.21806			922.5	292.124			293.54	3.55814			922.5	293.193			293.756	3.32471			922.5	292.893			293.678	3.23307
		923	295.507			293.505	3.76451			923	293.765			293.45	3.48832			923	293.038			293.318	3.28706			923	294.658			293.543	3.5571			923	289.133			293.756	3.32472			923	291.553			293.668	3.22867
		923.5	291.95			293.517	3.77435			923.5	288.831			293.418	3.51523			923.5	292.334			293.282	3.29117			923.5	291.308			293.503	3.59025			923.5	293.848			293.783	3.3582			923.5	296.298			293.676	3.22344
		924	292.993			293.513	3.77616			924	293.749			293.425	3.50766			924	296.652			293.281	3.29188			924	291.214			293.543	3.61144			924	294.785			293.757	3.37324			924	294.653			293.678	3.22406
		924.5	294.567			293.537	3.78826			924.5	296.153			293.429	3.50871			924.5	291.255			293.285	3.29209			924.5	292.614			293.524	3.63477			924.5	291.375			293.799	3.41596			924.5	292.121			293.679	3.22483
		925	294.053			293.518	3.79279			925	295.769			293.423	3.50491			925	295.102			293.271	3.28877			925	289.829			293.561	3.66307			925	299.431			293.768	3.44886			925	296.168			293.666	3.24
		925.5	292.187			293.517	3.79271			925.5	296.648			293.444	3.53179			925.5	296.017			293.267	3.28966			925.5	295.904			293.565	3.6594			925.5	295.387			293.768	3.45018			925.5	288.443			293.664	3.2383
		926	296.517			293.582	3.87886			926	292.833			293.422	3.52537			926	290.96			293.28	3.29114			926	291.083			293.549	3.65607			926	290.434			293.801	3.48364			926	299.595			293.676	3.22995
		926.5	288.914			293.541	3.891			926.5	294.526			293.435	3.52764			926.5	295.724			293.251	3.28651			926.5	293.818			293.558	3.65229			926.5	298.381			293.754	3.5345			926.5	294.534			293.647	3.22444
		927	295.85			293.559	3.87792			927	297.949			293.424	3.52768			927	291.443			293.251	3.2867			927	299.171			293.539	3.66053			927	296.714			293.781	3.53726			927	290.728			293.668	3.23405
		927.5	295.569			293.554	3.87587			927.5	295.403			293.427	3.5326			927.5	294.208			293.242	3.28409			927.5	288.834			293.519	3.64077			927.5	294.305			293.771	3.52403			927.5	304.292			293.644	3.26855
		928	288.952			293.525	3.88324			928	296.918			293.403	3.53536			928	293.436			293.244	3.28561			928	291.372			293.553	3.62822			928	297.114			293.722	3.57048			928	288.756			293.632	3.26319
		928.5	298.265			293.588	3.91297			928.5	293.653			293.383	3.52683			928.5	290.403			293.246	3.28437			928.5	291.309			293.551	3.6296			928.5	292.295			293.772	3.59507			928.5	300.975			293.616	3.26613
		929	295.146			293.543	3.91136			929	291.552			293.391	3.5291			929	299.98			293.233	3.27968			929	287.448			293.584	3.64025			929	291.221			293.757	3.58201			929	290.836			293.595	3.28972
		929.5	290.79			293.559	3.92426			929.5	297.887			293.398	3.52678			929.5	292.724			293.245	3.27759			929.5	299.664			293.599	3.62121			929.5	291.773			293.739	3.57615			929.5	293.319			293.612	3.31303
		930	296.972			293.575	3.91945			930	292.857			293.39	3.51858			930	296.271			293.227	3.28234			930	293.279			293.579	3.59848			930	292.767			293.721	3.58216			930	298.079			293.611	3.31431
		930.5	292.028			293.534	3.92652			930.5	289.333			293.406	3.52324			930.5	294.087			293.23	3.28279			930.5	288.131			293.579	3.59849			930.5	294.262			293.679	3.59212			930.5	288.333			293.569	3.29153
		931	296.52			293.562	3.9355			931	292.821			293.449	3.5264			931	286.543			293.232	3.2813			931	297.514			293.608	3.57781			931	289.593			293.694	3.59254			931	299.253			293.591	3.31188
		931.5	289.825			293.542	3.93049			931.5	294.616			293.466	3.53167			931.5	300.476			293.199	3.24627			931.5	290.01			293.58	3.56923			931.5	293.942			293.695	3.59166			931.5	291.941			293.584	3.31952
		932	294.167			293.546	3.92701			932	292.353			293.479	3.54051			932	288.131			293.23	3.27206			932	295.652			293.608	3.56329			932	293.714			293.675	3.61339			932	293.342			293.541	3.23547
		932.5	299.707			293.563	3.93663			932.5	294.742			293.514	3.56415			932.5	297.35			293.196	3.27602			932.5	295.407			293.569	3.58398			932.5	297.117			293.691	3.61645			932.5	291.467			293.573	3.21963
		933	287.938			293.51	3.92518			933	289.398			293.522	3.56826			933	295.113			293.189	3.2756			933	291.142			293.575	3.58844			933	298.673			293.678	3.61922			933	290.449			293.494	3.23257
		933.5	298.437			293.544	3.90641			933.5	298.55			293.537	3.55703			933.5	287.634			293.233	3.2448			933.5	301.057			293.579	3.58638			933.5	292.233			293.704	3.6084			933.5	298.047			293.53	3.24229
		934	292.133			293.52	3.89099			934	300.246			293.54	3.56073			934	297.575			293.181	3.21138			934	292.248			293.526	3.55338			934	291.788			293.71	3.60975			934	293.601			293.524	3.24361
		934.5	298.511			293.516	3.89319			934.5	294.544			293.497	3.53135			934.5	290.249			293.208	3.19142			934.5	296.589			293.553	3.56375			934.5	294.498			293.678	3.6373			934.5	292.371			293.501	3.22749
		935	296.959			293.505	3.88214			935	300.98			293.462	3.55555			935	295.819			293.189	3.17809			935	299.199			293.54	3.55735			935	289.289			293.688	3.64969			935	290.521			293.538	3.21056
		935.5	287.723			293.446	3.91858			935.5	288.782			293.43	3.51641			935.5	294.847			293.192	3.17982			935.5	294.961			293.516	3.53534			935.5	295.817			293.694	3.6591			935.5	292.326			293.5	3.1876
		936	294.229			293.487	3.90143			936	292.464			293.431	3.51515			936	290.599			293.238	3.16585			936	295.269			293.499	3.53664			936	293.28			293.713	3.66093			936	294.773			293.541	3.21874
		936.5	295.187			293.483	3.90109			936.5	295.761			293.463	3.53487			936.5	297.594			293.207	3.15377			936.5	292.382			293.473	3.54256			936.5	290.005			293.757	3.69083			936.5	294.104			293.535	3.21999
		937	289.545			293.449	3.91591			937	291.229			293.448	3.53149			937	290.085			293.228	3.14825			937	296.091			293.491	3.54592			937	292.508			293.738	3.69676			937	294.508			293.555	3.21949
		937.5	297.141			293.513	3.9569			937.5	299.322			293.437	3.54097			937.5	296.388			293.221	3.14402			937.5	293.647			293.484	3.54206			937.5	292.945			293.771	3.68679			937.5	292.296			293.608	3.25414
		938	290.529			293.464	3.97202			938	291.149			293.413	3.51708			938	295.442			293.211	3.14212			938	288.272			293.482	3.54204			938	292.245			293.765	3.68425			938	288.301			293.551	3.27474
		938.5	290.62			293.501	3.97912			938.5	284.547			293.414	3.51661			938.5	290.331			293.24	3.1451			938.5	295.964			293.5	3.52477			938.5	289.152			293.741	3.70281			938.5	294.24			293.558	3.27618
		939	295.371			293.536	3.98434			939	296.394			293.481	3.47512			939	299.032			293.207	3.13409			939	290.981			293.506	3.52949			939	293.011			293.805	3.75057			939	291.41			293.574	3.27846
		939.5	298.15			293.498	4.00324			939.5	295.915			293.484	3.47739			939.5	293.839			293.22	3.12646			939.5	293.862			293.486	3.55429			939.5	293.454			293.781	3.77549			939.5	294.315			293.564	3.29192
		940	294.835			293.513	4.02641			940	292.474			293.464	3.47461			940	292.078			293.217	3.1241			940	292.056			293.481	3.55441			940	299.649			293.77	3.78117			940	293.068			293.608	3.33485
		940.5	292.98			293.463	4.0713			940.5	296.441			293.498	3.49858			940.5	294.071			293.211	3.12093			940.5	292.521			293.505	3.5604			940.5	291.411			293.814	3.81493			940.5	292.582			293.594	3.33574
		941	293.363			293.488	4.08327			941	289.986			293.445	3.53414			941	294.445			293.219	3.11569			941	296.57			293.521	3.56355			941	289.524			293.798	3.8405			941	300.749			293.602	3.33889
		941.5	290.732			293.493	4.08373			941.5	296.732			293.47	3.52696			941.5	293.888			293.189	3.08835			941.5	293.487			293.513	3.55827			941.5	295.433			293.82	3.84866			941.5	290.153			293.605	3.33988
		942	292.722			293.48	4.09731			942	290.217			293.474	3.53126			942	294.546			293.186	3.08801			942	300.231			293.52	3.55949			942	291.81			293.831	3.85059			942	295.614			293.603	3.3408
		942.5	292.752			293.484	4.09697			942.5	294.52			293.472	3.53333			942.5	293.269			293.211	3.09918			942.5	293.589			293.505	3.53823			942.5	293.777			293.784	3.83718			942.5	294.341			293.636	3.321
		943	299.232			293.474	4.10143			943	294.197			293.489	3.54665			943	290.441			293.21	3.09893			943	292.078			293.503	3.53833			943	290.906			293.81	3.83901			943	288.749			293.621	3.32494
		943.5	296.427			293.457	4.08471			943.5	291.56			293.473	3.55031			943.5	292.559			293.188	3.10584			943.5	299.8			293.494	3.5442			943.5	294.411			293.824	3.82838			943.5	294.085			293.618	3.32718
		944	291.377			293.434	4.08091			944	292.895			293.485	3.54783			944	294.475			293.172	3.11049			944	293.396			293.462	3.5159			944	295.847			293.816	3.82668			944	296.065			293.644	3.35236
		944.5	292.037			293.436	4.08016			944.5	292.34			293.494	3.54884			944.5	292.04			293.169	3.10955			944.5	291.023			293.46	3.51605			944.5	297.914			293.83	3.82463			944.5	292.031			293.634	3.35683
		945	295.161			293.433	4.08115			945	299.19			293.464	3.58561			945	297.741			293.177	3.11204			945	294.581			293.488	3.51889			945	288.92			293.802	3.84616			945	295.185			293.67	3.38386
		945.5	296.249			293.432	4.08089			945.5	294.068			293.461	3.58108			945.5	291.474			293.177	3.11219			945.5	296.099			293.492	3.52027			945.5	298.443			293.837	3.8522			945.5	288.799			293.641	3.34759
		946	295.896			293.413	4.07671			946	288.956			293.443	3.58693			946	295.564			293.176	3.11236			946	298.907			293.476	3.51566			946	294.701			293.814	3.86279			946	295.795			293.669	3.34157
		946.5	293.264			293.419	4.08164			946.5	294.959			293.457	3.57459			946.5	291.665			293.172	3.11116			946.5	291.502			293.439	3.4969			946.5	291.848			293.807	3.86037			946.5	291.576			293.655	3.33909
		947	300.438			293.408	4.08555			947	297.789			293.458	3.57505			947	288.697			293.168	3.1131			947	294.968			293.42	3.51825			947	296.302			293.793	3.85033			947	297.685			293.633	3.35014
		947.5	287.173			293.379	4.05612			947.5	290.894			293.424	3.56619			947.5	298.356			293.139	3.09752			947.5	298.859			293.418	3.5174			947.5	289.219			293.81	3.83617			947.5	300.204			293.658	3.33225
		948	293.893			293.413	4.03241			948	295.327			293.446	3.56402			948	289.002			293.146	3.0953			948	290.783			293.402	3.50028			948	298.837			293.818	3.84703			948	294.224			293.666	3.33509
		948.5	296.042			293.418	4.03352			948.5	290.567			293.443	3.56273			948.5	293.779			293.151	3.10013			948.5	289.572			293.432	3.50296			948.5	290.761			293.818	3.84722			948.5	295.983			293.63	3.34754
		949	290.347			293.39	4.03464			949	299.705			293.478	3.56908			949	295.623			293.166	3.10004			949	295.116			293.439	3.49639			949	294.05			293.845	3.85185			949	292.613			293.636	3.34573
		949.5	298.914			293.404	4.02888			949.5	287.273			293.447	3.54169			949.5	291.859			293.18	3.08621			949.5	293.741			293.419	3.49846			949.5	297.636			293.849	3.85517			949.5	294.221			293.628	3.34396
		950	289.274			293.37	4.01091			950	294.051			293.489	3.51818			950	297.197			293.149	3.06521			950	290.681			293.423	3.49944			950	290.465			293.879	3.84233			950	294.773			293.661	3.32893
		950.5	293.203			293.41	4.00928			950.5	289.108			293.487	3.51796			950.5	290.484			293.193	3.06901			950.5	291.954			293.439	3.49413			950.5	297.814			293.872	3.83477			950.5	290.405			293.658	3.32747
		951	295.819			293.378	4.03561			951	293.69			293.477	3.5326			951	288.941			293.176	3.0754			951	291.517			293.456	3.49558			951	295.987			293.876	3.83217			951	297.196			293.649	3.33597
		951.5	289.634			293.387	4.04297			951.5	294.554			293.481	3.53338			951.5	300.277			293.178	3.07775			951.5	293.94			293.471	3.49353			951.5	291.058			293.867	3.8337			951.5	293.426			293.641	3.32824
		952	298.787			293.396	4.03665			952	291.908			293.466	3.53523			952	291.363			293.193	3.07819			952	293.862			293.452	3.50106			952	295.828			293.853	3.82494			952	291.697			293.609	3.2956
		952.5	290.36			293.36	4.02041			952.5	294.379			293.475	3.53353			952.5	297.305			293.154	3.07582			952.5	291.127			293.452	3.50109			952.5	292.07			293.877	3.81878			952.5	291.551			293.607	3.29533
		953	291.144			293.394	4.02296			953	291.529			293.438	3.56205			953	294.661			293.182	3.07658			953	296.681			293.447	3.50549			953	296.134			293.844	3.81364			953	294.547			293.61	3.29803
		953.5	299.229			293.413	4.02142			953.5	294.885			293.451	3.5597			953.5	295.518			293.197	3.06297			953.5	296.538			293.418	3.50293			953.5	295.421			293.831	3.81072			953.5	294.917			293.61	3.29832
		954	288.958			293.381	4.00047			954	293.272			293.453	3.56077			954	293.583			293.167	3.02238			954	292.917			293.4	3.49609			954	291.637			293.869	3.82121			954	295.886			293.624	3.30724
		954.5	300.061			293.422	3.99756			954.5	294.524			293.445	3.56278			954.5	290.635			293.181	3.02048			954.5	292.808			293.412	3.49837			954.5	298.001			293.865	3.81958			954.5	291.912			293.633	3.31291
		955	297.087			293.381	3.97143			955	295.493			293.466	3.58108			955	290.676			293.146	3.01257			955	297.565			293.422	3.49988			955	289.915			293.875	3.81749			955	288.208			293.632	3.31411
		955.5	295.651			293.383	3.97403			955.5	294.092			293.471	3.5845			955.5	295.813			293.172	3.04651			955.5	295.071			293.407	3.48834			955.5	290.428			293.866	3.8142			955.5	291.884			293.62	3.30552
		956	299.351			293.368	3.97115			956	293.156			293.458	3.58722			956	291.769			293.147	3.04719			956	290.928			293.404	3.48706			956	297.494			293.857	3.81263			956	301.996			293.609	3.30972
		956.5	288.045			293.341	3.94859			956.5	295.745			293.489	3.61239			956.5	297.938			293.163	3.05753			956.5	300.021			293.449	3.51489			956.5	291.761			293.882	3.81427			956.5	287.263			293.598	3.31916
		957	292.578			293.387	3.94091			957	295.079			293.472	3.60981			957	290.405			293.19	3.05893			957	289.99			293.44	3.49897			957	295.601			293.848	3.80723			957	294.237			293.611	3.31611
		957.5	295.524			293.373	3.94875			957.5	288.672			293.462	3.60807			957.5	295.304			293.179	3.07167			957.5	295.163			293.462	3.49111			957.5	295.718			293.875	3.79832			957.5	292.106			293.6	3.31642
		958	294.727			293.391	3.96642			958	295.289			293.472	3.59765			958	298.705			293.195	3.09334			958	294.491			293.475	3.50318			958	286.657			293.901	3.79262			958	288.454			293.603	3.31744
		958.5	294.957			293.379	3.96599			958.5	289.687			293.461	3.59547			958.5	294.402			293.192	3.09488			958.5	290.716			293.468	3.50256			958.5	298.192			293.868	3.79025			958.5	299.21			293.605	3.31959
		959	295.606			293.372	3.96442			959	296.895			293.48	3.58551			959	298.664			293.193	3.09557			959	294.307			293.497	3.50343			959	287.526			293.894	3.79378			959	290.779			293.588	3.33698
		959.5	289.128			293.371	3.96393			959.5	292.308			293.45	3.58202			959.5	288.356			293.229	3.10554			959.5	292.695			293.505	3.50707			959.5	296.721			293.866	3.80246			959.5	298.983			293.625	3.31773
		960	293.806			293.374	3.96061			960	288.862			293.465	3.58319			960	293.885			293.198	3.11587			960	293.489			293.522	3.51146			960	295.289			293.856	3.80022			960	289.465			293.616	3.32494
		960.5	291.09			293.367	3.96118			960.5	295.089			293.477	3.57134			960.5	292.56			293.152	3.10211			960.5	295.267			293.512	3.51421			960.5	287.557			293.9	3.76744			960.5	292.287			293.559	3.27788
		961	288.021			293.378	3.9579			961	289.594			293.453	3.57643			961	289.256			293.148	3.10097			961	287.874			293.518	3.51786			961	295.258			293.857	3.76679			961	295.508			293.609	3.25781
		961.5	297.201			293.409	3.94012			961.5	288.105			293.49	3.57427			961.5	295.641			293.119	3.07626			961.5	298.677			293.545	3.49504			961.5	289.537			293.912	3.75486			961.5	293.567			293.594	3.26211
		962	289.103			293.382	3.93276			962	297.86			293.507	3.55647			962	292.168			293.15	3.05931			962	292.622			293.495	3.49412			962	292.53			293.877	3.76172			962	291.493			293.594	3.26203
		962.5	292.735			293.405	3.92113			962.5	292.385			293.504	3.55277			962.5	289.983			293.127	3.07103			962.5	288.966			293.506	3.49476			962.5	297.748			293.869	3.76043			962.5	293.379			293.623	3.24199
		963	298.842			293.397	3.92435			963	292.39			293.483	3.57232			963	296.376			293.122	3.07271			963	296.11			293.533	3.48053			963	295.225			293.906	3.73443			963	291.498			293.585	3.22078
		963.5	295.679			293.372	3.90548			963.5	294.762			293.472	3.57883			963.5	292.776			293.147	3.06159			963.5	291.737			293.491	3.50063			963.5	298.939			293.877	3.74628			963.5	292.3			293.627	3.23919
		964	291.389			293.368	3.90339			964	290.703			293.492	3.59718			964	295.877			293.132	3.05679			964	292.641			293.491	3.50063			964	290.434			293.929	3.75871			964	296.771			293.574	3.2388
		964.5	289.231			293.371	3.90204			964.5	298.793			293.475	3.61878			964.5	291.13			293.14	3.05645			964.5	293.626			293.48	3.50653			964.5	292.744			293.909	3.77631			964.5	292.229			293.579	3.23355
		965	294.779			293.403	3.89421			965	291.407			293.455	3.60053			965	288.271			293.152	3.04868			965	286.932			293.513	3.53889			965	294.128			293.873	3.77437			965	294.185			293.599	3.23818
		965.5	293.862			293.394	3.89312			965.5	292.265			293.442	3.61239			965.5	294.045			293.141	3.04076			965.5	295.77			293.554	3.50994			965.5	296.434			293.879	3.77734			965.5	291.556			293.582	3.23689
		966	291.799			293.415	3.90741			966	293.086			293.432	3.61901			966	291.538			293.153	3.04462			966	291.167			293.529	3.51226			966	293.265			293.844	3.76289			966	290.419			293.585	3.23711
		966.5	294.252			293.409	3.91061			966.5	291.131			293.451	3.62715			966.5	296.422			293.129	3.04247			966.5	294.909			293.553	3.51292			966.5	293.809			293.88	3.76468			966.5	298.403			293.607	3.238
		967	297.029			293.417	3.91397			967	291.758			293.437	3.64094			967	287.691			293.162	3.05742			967	290.422			293.535	3.51507			967	291.142			293.85	3.79742			967	290.486			293.576	3.27091
		967.5	289.75			293.409	3.90827			967.5	296.306			293.455	3.64116			967.5	290.071			293.159	3.06268			967.5	293.223			293.549	3.50829			967.5	297.468			293.833	3.8033			967.5	296.46			293.617	3.29671
		968	300.562			293.416	3.90349			968	291.112			293.414	3.65506			968	294.439			293.175	3.07488			968	290.342			293.54	3.51097			968	296.141			293.831	3.80186			968	297.114			293.608	3.30321
		968.5	293.037			293.368	3.87384			968.5	292.497			293.407	3.66077			968.5	290.768			293.182	3.07271			968.5	294.489			293.575	3.51348			968.5	295.861			293.814	3.81204			968.5	287.955			293.585	3.29686
		969	294.539			293.372	3.87391			969	290.175			293.422	3.66338			969	293.442			293.175	3.06669			969	296.858			293.566	3.51349			969	289.048			293.841	3.83093			969	298.802			293.605	3.30042
		969.5	290.933			293.357	3.87529			969.5	296.512			293.445	3.65745			969.5	292.971			293.209	3.0434			969.5	294.003			293.53	3.51631			969.5	291.961			293.821	3.85455			969.5	292.069			293.585	3.30849
		970	296.544			293.385	3.87809			970	299.659			293.422	3.65273			970	296.096			293.194	3.06545			970	292.748			293.543	3.5229			970	292.555			293.801	3.84602			970	292.991			293.604	3.30756
		970.5	297.684			293.358	3.87506			970.5	290.356			293.388	3.62613			970.5	292.845			293.225	3.1077			970.5	295.754			293.529	3.53193			970.5	287.809			293.79	3.84246			970.5	296.364			293.609	3.30332
		971	295.085			293.366	3.88595			971	296.865			293.391	3.62342			971	291.217			293.234	3.10304			971	294.149			293.548	3.55414			971	291.089			293.766	3.8442			971	290.663			293.583	3.28592
		971.5	291.409			293.353	3.88469			971.5	296.604			293.396	3.62851			971.5	295.369			293.197	3.14654			971.5	292.971			293.543	3.55402			971.5	297.308			293.774	3.83652			971.5	297.585			293.628	3.30481
		972	292.753			293.381	3.89157			972	293.066			293.372	3.62298			972	294.905			293.203	3.14736			972	296.171			293.536	3.55609			972	290.986			293.781	3.83446			972	294.307			293.595	3.30994
		972.5	297.398			293.366	3.89968			972.5	299.688			293.368	3.62383			972.5	288.373			293.199	3.14416			972.5	294.745			293.52	3.55142			972.5	294.372			293.805	3.8419			972.5	293.065			293.568	3.30307
		973	291.279			293.362	3.89593			973	286.908			293.356	3.60654			973	294.799			293.207	3.1454			973	297.891			293.487	3.57077			973	287.962			293.817	3.82715			973	296.603			293.631	3.31611
		973.5	298.156			293.37	3.89335			973.5	290.312			293.366	3.59071			973.5	288.82			293.211	3.14329			973.5	294.501			293.475	3.55987			973.5	293.299			293.84	3.82485			973.5	291.345			293.595	3.29879
		974	291.171			293.328	3.88724			974	294.661			293.398	3.59137			974	287.347			293.208	3.14153			974	298.269			293.469	3.55915			974	302.141			293.84	3.82432			974	302.462			293.624	3.31013
		974.5	291.095			293.359	3.89487			974.5	289.527			293.407	3.59669			974.5	295.029			293.208	3.14144			974.5	294.521			293.435	3.54567			974.5	283.26			293.823	3.84425			974.5	294.991			293.589	3.35327
		975	300.556			293.369	3.89157			975	290.71			293.421	3.58686			975	289.582			293.207	3.14384			975	295.472			293.476	3.60543			975	300.16			293.841	3.85593			975	294.362			293.574	3.34753
		975.5	287.151			293.346	3.86232			975.5	294.753			293.452	3.5906			975.5	291.589			293.251	3.22726			975.5	294.921			293.445	3.61509			975.5	287.203			293.846	3.84943			975.5	295.066			293.618	3.36717
		976	294.707			293.383	3.83808			976	290.554			293.458	3.59352			976	292.84			293.274	3.21197			976	293.849			293.438	3.61357			976	291.335			293.89	3.89347			976	291.739			293.595	3.35563
		976.5	293.694			293.347	3.85936			976.5	293.875			293.46	3.59184			976.5	290.418			293.305	3.18445			976.5	295.656			293.446	3.61617			976.5	301.368			293.857	3.85103			976.5	291.846			293.634	3.40824
		977	286.032			293.34	3.86002			977	292.575			293.448	3.59482			977	297.896			293.315	3.19376			977	292.96			293.43	3.6134			977	291.243			293.86	3.8434			977	294.831			293.632	3.40875
		977.5	301.762			293.367	3.82722			977.5	294.933			293.439	3.59917			977.5	296.797			293.328	3.18393			977.5	291.47			293.434	3.6134			977.5	296.293			293.848	3.82734			977.5	293.531			293.61	3.40351
		978	291.143			293.314	3.78384			978	292.155			293.429	3.59779			978	291.167			293.363	3.20373			978	295.082			293.461	3.61804			978	293.463			293.856	3.81445			978	289.689			293.65	3.42392
		978.5	293.751			293.322	3.78101			978.5	291.092			293.433	3.59681			978.5	297.044			293.389	3.22081			978.5	297.566			293.446	3.61727			978.5	292.725			293.862	3.81146			978.5	288.587			293.615	3.36863
		979	301.124			293.305	3.78665			979	294.79			293.432	3.59751			979	291.154			293.416	3.21844			979	293.041			293.44	3.61143			979	297.499			293.854	3.79685			979	289.53			293.627	3.37769
		979.5	287.406			293.266	3.74586			979.5	290.558			293.433	3.59793			979.5	290.921			293.389	3.20336			979.5	297.98			293.435	3.61269			979.5	296.838			293.834	3.82047			979.5	295.509			293.608	3.38346
		980	295.774			293.293	3.72296			980	294.936			293.453	3.593			980	292.653			293.379	3.1954			980	290.123			293.41	3.59853			980	296.706			293.812	3.81912			980	292.413			293.58	3.39504
		980.5	294.953			293.27	3.72157			980.5	291.438			293.424	3.60369			980.5	286.735			293.414	3.20952			980.5	297.119			293.424	3.59113			980.5	293.343			293.8	3.8238			980.5	298.939			293.624	3.42795
		981	286.849			293.243	3.72849			981	292.23			293.444	3.60385			981	293.736			293.396	3.19921			981	285.238			293.394	3.58517			981	300.605			293.844	3.86188			981	290.251			293.624	3.42793
		981.5	304.186			293.28	3.70138			981.5	292.808			293.436	3.60902			981.5	287.119			293.409	3.19532			981.5	291.851			293.44	3.53891			981.5	292.886			293.815	3.85633			981.5	292.286			293.583	3.46337
		982	294.646			293.208	3.62823			982	291.309			293.45	3.61224			982	291.136			293.426	3.19121			982	291.034			293.441	3.53819			982	290.435			293.767	3.87807			982	292.281			293.616	3.49533
		982.5	288.514			293.219	3.63648			982.5	295.133			293.458	3.60918			982.5	295.775			293.432	3.19087			982.5	300.6			293.463	3.53676			982.5	297.141			293.768	3.87878			982.5	290.534			293.631	3.48479
		983	297.387			293.256	3.6259			983	288.49			293.458	3.60885			983	284.282			293.44	3.17722			983	293.929			293.442	3.50638			983	288.261			293.783	3.88292			983	293.865			293.662	3.46732
		983.5	284.078			293.234	3.61409			983.5	297.754			293.503	3.60352			983.5	292.664			293.457	3.18818			983.5	293.456			293.429	3.50927			983.5	298.526			293.744	3.85324			983.5	295.771			293.707	3.4725
		984	295.493			293.282	3.55541			984	292.219			293.478	3.59123			984	289.571			293.48	3.15871			984	291.587			293.429	3.50927			984	293.055			293.751	3.85288			984	294.485			293.678	3.48181
		984.5	292.648			293.303	3.58157			984.5	290.72			293.478	3.59159			984.5	293.816			293.458	3.19031			984.5	291.523			293.45	3.51033			984.5	289.281			293.774	3.84669			984.5	290.88			293.693	3.4825
		985	287.898			293.283	3.59717			985	298.812			293.524	3.61542			985	293.084			293.458	3.19053			985	296.509			293.45	3.51002			985	296.361			293.748	3.84124			985	294.672			293.661	3.46332
		985.5	294.827			293.323	3.58187			985.5	291.751			293.496	3.59595			985.5	294.25			293.504	3.12353			985.5	291.255			293.425	3.50624			985.5	294.129			293.783	3.82286			985.5	292.736			293.669	3.45736
		986	286.152			293.3	3.58685			986	291.27			293.508	3.5941			986	295.536			293.531	3.13992			986	292.94			293.412	3.51904			986	294.304			293.75	3.81017			986	293.814			293.685	3.45805
		986.5	293.288			293.345	3.55347			986.5	298.664			293.522	3.59071			986.5	295.38			293.56	3.12974			986.5	300.344			293.442	3.54012			986.5	293.184			293.736	3.81803			986.5	288.862			293.663	3.47991
		987	290.905			293.353	3.55489			987	294.127			293.482	3.57762			987	292.562			293.585	3.15138			987	288.922			293.4	3.5077			987	294.379			293.765	3.80603			987	299.327			293.686	3.47426
		987.5	287.736			293.338	3.57051			987.5	297.869			293.48	3.57736			987.5	294.345			293.572	3.1585			987.5	295.929			293.428	3.49418			987.5	294.292			293.746	3.80235			987.5	288.015			293.683	3.47433
		988	297.442			293.407	3.59389			988	292.994			293.439	3.57387			988	291.329			293.584	3.16557			988	296.418			293.404	3.49291			988	296.056			293.747	3.80249			988	298.291			293.64	3.50197
		988.5	297.495			293.387	3.58252			988.5	293.223			293.435	3.57482			988.5	296.055			293.585	3.1665			988.5	293.152			293.397	3.48787			988.5	290.724			293.734	3.80523			988.5	295.266			293.66	3.5187
		989	295.229			293.356	3.57428			989	293.772			293.459	3.59014			989	292.916			293.596	3.17628			989	298.769			293.407	3.49014			989	295.297			293.728	3.8069			989	292.259			293.642	3.54325
		989.5	302.218			293.36	3.57729			989.5	292.324			293.447	3.59366			989.5	288.856			293.636	3.21435			989.5	292.688			293.393	3.4741			989.5	293.599			293.742	3.81425			989.5	299.874			293.658	3.55511
		990	287.152			293.325	3.52407			990	291.16			293.461	3.59496			990	296.216			293.611	3.22883			990	295.181			293.392	3.47436			990	296.167			293.735	3.8145			990	294.312			293.656	3.55548
		990.5	297.332			293.368	3.50135			990.5	293.072			293.473	3.59127			990.5	291.064			293.659	3.2653			990.5	294.776			293.389	3.47303			990.5	296.132			293.697	3.82963			990.5	291.304			293.634	3.56834
		991	292.21			293.359	3.49307			991	293.942			293.483	3.59296			991	297.501			293.652	3.26185			991	293.023			293.385	3.47206			991	294.85			293.689	3.83689			991	297.848			293.656	3.55246
		991.5	290.007			293.353	3.4958			991.5	296.441			293.458	3.60701			991.5	297.153			293.665	3.2638			991.5	294.633			293.396	3.47427			991.5	289.69			293.658	3.84895			991.5	290.314			293.634	3.53116
		992	289.6			293.374	3.4883			992	293.252			293.429	3.60645			992	290.221			293.719	3.27343			992	286.326			293.407	3.48173			992	298.03			293.658	3.84897			992	296.921			293.666	3.50904
		992.5	291.021			293.417	3.49456			992.5	290.324			293.439	3.6089			992.5	298.71			293.701	3.26931			992.5	296.29			293.459	3.45301			992.5	289.159			293.656	3.84786			992.5	292.728			293.621	3.5073
		993	293.293			293.426	3.49074			993	299.032			293.453	3.60225			993	291.837			293.731	3.27199			993	290.037			293.459	3.45318			993	297.481			293.64	3.84413			993	293.091			293.594	3.51642
		993.5	294.83			293.448	3.50366			993.5	285.04			293.411	3.58598			993.5	297.416			293.716	3.2615			993.5	290.829			293.462	3.4502			993.5	294.96			293.649	3.84872			993.5	300.481			293.62	3.5265
		994	292.375			293.449	3.50408			994	292.739			293.461	3.53834			994	294.256			293.675	3.26954			994	302.07			293.467	3.44749			994	294.516			293.647	3.85049			994	291.394			293.604	3.50521
		994.5	293.041			293.433	3.5161			994.5	297.313			293.457	3.53959			994.5	292.431			293.697	3.26114			994.5	286.147			293.457	3.42674			994.5	298.874			293.627	3.83805			994.5	296.651			293.607	3.50608
		995	293.247			293.456	3.52875			995	286.12			293.438	3.52903			995	297.98			293.665	3.24341			995	298.789			293.496	3.38752			995	291.545			293.656	3.82597			995	296.169			293.63	3.50562
		995.5	291.648			293.46	3.52899			995.5	298.536			293.457	3.49987			995.5	291.838			293.692	3.25121			995.5	294.202			293.472	3.36683			995.5	297.116			293.625	3.82017			995.5	289.65			293.62	3.49652
		996	292.611			293.45	3.53694			996	290.933			293.439	3.48302			996	293.027			293.685	3.24423			996	290.126			293.5	3.39502			996	298.226			293.638	3.82936			996	295.326			293.668	3.51787
		996.5	298.775			293.463	3.53837			996.5	295.242			293.448	3.47887			996.5	292.848			293.682	3.24398			996.5	293.52			293.518	3.38663			996.5	290.359			293.65	3.83599			996.5	294.074			293.662	3.51318
		997	297.84			293.433	3.51848			997	291.33			293.421	3.48588			997	293.913			293.683	3.24337			997	289.166			293.508	3.38958			997	297.645			293.617	3.81915			997	293.086			293.663	3.51289
		997.5	291.383			293.396	3.51137			997.5	287.805			293.431	3.48273			997.5	290.817			293.653	3.23137			997.5	289.699			293.537	3.37719			997.5	288.705			293.612	3.82314			997.5	295.097			293.671	3.51323
		998	293.892			293.391	3.51452			998	293.587			293.456	3.46015			998	292.361			293.672	3.23162			998	294.619			293.541	3.37251			998	296.978			293.591	3.81538			998	293.132			293.636	3.4799
		998.5	294.028			293.405	3.52225			998.5	295.286			293.465	3.46313			998.5	292.331			293.702	3.25417			998.5	290.675			293.542	3.37268			998.5	295.876			293.555	3.80559			998.5	292.576			293.655	3.47804
[truncated: 2,403 more rows]
[truncated: 26 more columns]

## Sheet: Potential Energy
		R150Q			Trajectory #2					R150Q			Trajectory #1					R150Q			Trajectory #3					R150-WT			Trajectory #1					R150-WT			Trajectory #2					R150-WT			Trajectory #3
																			checkcheck
		t (ps)	U (Kcal/mol)			AVG	STDEV			t (ps)	U (Kcal/mol)		(picoseconds used for AVG/STDEV)	AVG	STDEV			t (ps)	U (Kcal/mol)			AVG	STDEV			t (ps)	U (Kcal/mol)			AVG	STDEV			t (ps)	U (Kcal/mol)			AVG	STDEV			t (ps)	U (Kcal/mol)			AVG	STDEV
		0	-14620.1		0-100	-10619.7	405.858			0	-14672.4		0-100	-10682.9	405.586			0	-14727.5		0-100	-10719.8	405.148			0	-15663.8		0-100	-11583.8	413.394			0	-15598.9		0-100	-11587.9	411.324			0	-15611.3		0-100	-11563.8	412.941
		0.5	-9058.41		0.5-100.5	-10601.1	291.107			0.5	-9092.72		0.5-100.5	-10664.4	291.447			0.5	-9130.63		0.5-100.5	-10699.8	289.578			0.5	-10056.2		0.5-100.5	-11565.1	296.382			0.5	-10031.8		0.5-100.5	-11567.8	297.971			0.5	-9954.44		0.5-100.5	-11563.8	412.941
		1	-10880.7		1-101	-10608.3	269.904			1	-10968.1		1-101	-10671.9	269.358			1	-11102.2		1-101	-10708.8	267.71			1	-11969.1		1-101	-11571.9	276.625			1	-11894.5		1-101	-11575.9	277.31			1	-11825.8		1-101	-11543.4	297.031
		1.5	-11590		…	-10606	269.525			1.5	-11772.3		…	-10669.1	269.134			1.5	-11792.8		…	-10706.1	266.4			1.5	-12617.9		…	-11568.2	276.324			1.5	-12673.8		…	-11574	276.435			1.5	-12650.2		…	-11552	274.71
		2	-8616.81			-10602.2	260.837			2	-8723.18			-10665.2	258.54			2	-8805.51			-10699.1	255.98			2	-9629.15			-11564.3	266.791			2	-9638.46			-11567.6	265.417			2	-9565.04			-11552.3	275.139
		2.5	-11513			-10610.5	220.864			2.5	-11612			-10673.5	219.825			2.5	-11568.7			-10709.5	218.146			2.5	-12506.4			-11571.8	230.766			2.5	-12407.5			-11578.7	228.19			2.5	-12392.2			-11546.6	263.801
		3	-9687.99			-10606.4	211.48			3	-9747.31			-10669.1	209.57			3	-9685.89			-10703.4	210.904			3	-10492.1			-11567.6	221.125			3	-10607.3			-11572.9	221.711			3	-10529.3			-11555.6	223.269
		3.5	-9945.83			-10611.3	201.242			3.5	-10109.1			-10673.8	199.128			3.5	-10012.4			-10708.8	198.15			3.5	-10874.2			-11573.4	207.676			3.5	-10864.9			-11578.4	211.028			3.5	-10833.9			-11553.1	216.462
		4	-11271			-10613.2	196.551			4	-11161.8			-10675.7	195.592			4	-11294			-10712.5	191.905			4	-12051.3			-11575.2	203.052			4	-12023.4			-11582	204.847			4	-12051.5			-11556.1	205.985
		4.5	-9303.27			-10610.6	191.183			4.5	-9341.19			-10674.1	192.914			4.5	-9374.63			-10708.4	188.248			4.5	-10212			-11573.7	200.589			4.5	-10243.3			-11578.7	202.941			4.5	-10197.5			-11560.2	199.543
		5	-10934.9			-10616.7	167.348			5	-10942.5			-10680.4	168.263			5	-11011			-10716.1	163.24			5	-11862.2			-11579.6	176.357			5	-11885.1			-11586.6	180.1			5	-11892			-11557.7	196.45
		5.5	-10479			-10614.7	165.938			5.5	-10410.3			-10678.9	167.265			5.5	-10415.7			-10713.4	162.712			5.5	-11236.1			-11577.6	175.399			5.5	-11260.5			-11584.4	179.125			5.5	-11215			-11562.7	173.022
		6	-9794.89			-10615.6	165.689			6	-9963.78			-10681.1	166.718			6	-10033.6			-10714.3	161.562			6	-10756.1			-11579.8	173.891			6	-10889.5			-11586.2	177.663			6	-10843.1			-11561.8	171.773
		6.5	-11061.6			-10618.7	155.801			6.5	-11021.4			-10684.2	158.956			6.5	-11014.9			-10718.3	154.365			6.5	-11931.7			-11582.4	165.29			6.5	-11839			-11590.4	170.953			6.5	-11963.5			-11562.6	170.489
		7	-9694.25			-10616.9	152.751			7	-9733.05			-10682.9	157.263			7	-9794.25			-10715.6	153.897			7	-10604.7			-11581.1	163.539			7	-10637.5			-11588.2	170.65			7	-10673.4			-11565.4	162.976
		7.5	-10463.8			-10621	138.276			7.5	-10599.3			-10687.4	142.194			7.5	-10592.7			-10720.4	139.311			7.5	-11495.3			-11585.5	148.293			7.5	-11516.3			-11593.5	156.911			7.5	-11407.1			-11564.1	160.752
		8	-10624.3			-10621.5	137.893			8	-10512.9			-10687.4	142.165			8	-10635.9			-10720.8	139.07			8	-11496			-11585.4	148.41			8	-11344.7			-11593.9	156.817			8	-11469.9			-11567.4	148.65
		8.5	-9859.29			-10621.7	137.953			8.5	-9858.23			-10689.2	142.207			8.5	-9989.61			-10720.5	139.334			8.5	-10858.7			-11586.3	148.452			8.5	-10902.5			-11594.7	155.961			8.5	-10752.5			-11568.4	148.232
		9	-10818.5			-10625	127.133			9	-10775.9			-10693.4	129.435			9	-10872.6			-10724.3	129.308			9	-11727.7			-11589	139.877			9	-11675.4			-11598.8	148.269			9	-11728.5			-11568	148.564
		9.5	-10201.7			-10623.9	126.417			9.5	-10235.5			-10693.3	129.401			9.5	-10190.4			-10722.9	129.235			9.5	-11116			-11588.2	139.544			9.5	-10944.1			-11597.7	148.535			9.5	-11050.6			-11571.3	137.282
		10	-10271.5			-10625.7	122.902			10	-10360.9			-10695.6	125.264			10	-10417.2			-10724.7	124.156			10	-11277			-11590.7	135.483			10	-11330.3			-11601.1	141.095			10	-11245.6			-11571	137.072
		10.5	-10709.8			-10627.2	120.373			10.5	-10734.3			-10697.2	123.006			10.5	-10773.4			-10726	122.273			10.5	-11618.1			-11591.1	134.603			10.5	-11541.7			-11602.7	139.803			10.5	-11564			-11572.7	132.692
		11	-9990.82			-10626.6	120.243			11	-10126.6			-10697.1	122.986			11	-10117.5			-10724.6	123.282			11	-11028.4			-11591	134.589			11	-10869.5			-11602.4	139.945			11	-10959			-11574	130.734
[truncated: 4,378 more rows]
[truncated: 25 more columns]

## Sheet: RMSD
	Table S1. Average RMSD for the simulated AS1 residues
[truncated: 4,401 more rows]
